# Supplementary material for: Accelerating the prediction and discovery of peptide hydrogels with human-in-the-loop
Source: PubMed Central journal article supplement (PMC10313671; doi:10.1038/s41467-023-39648-2), 2023-06-30

1. Compound **LWFW**: obsvd.  $[M+H^+] = 651.4$

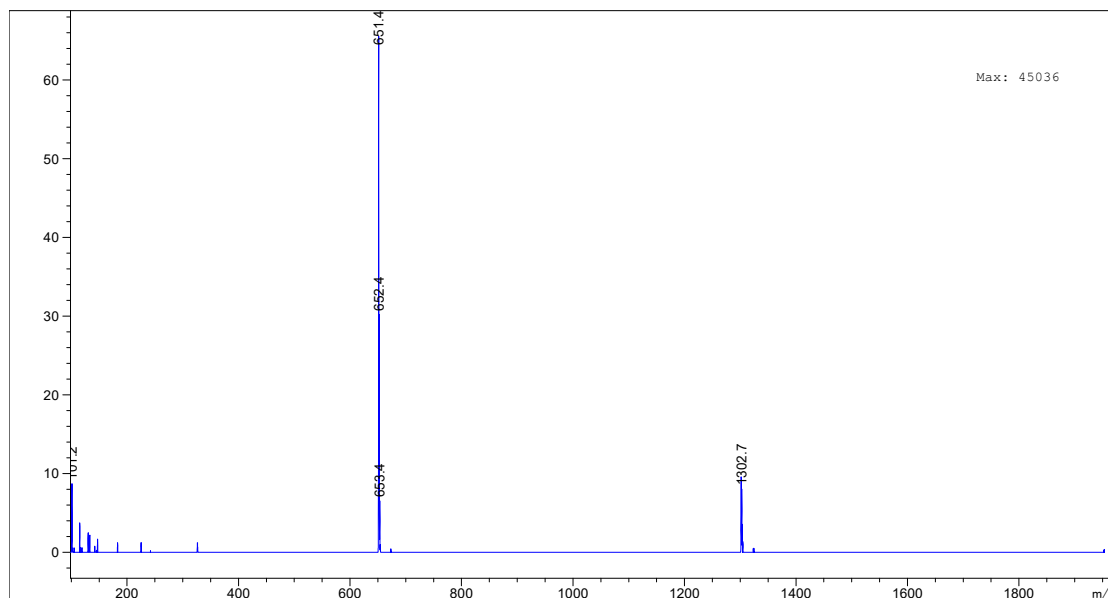

2. Compound **WV FY**: obsvd.  $[M+H^+] = 614.3$

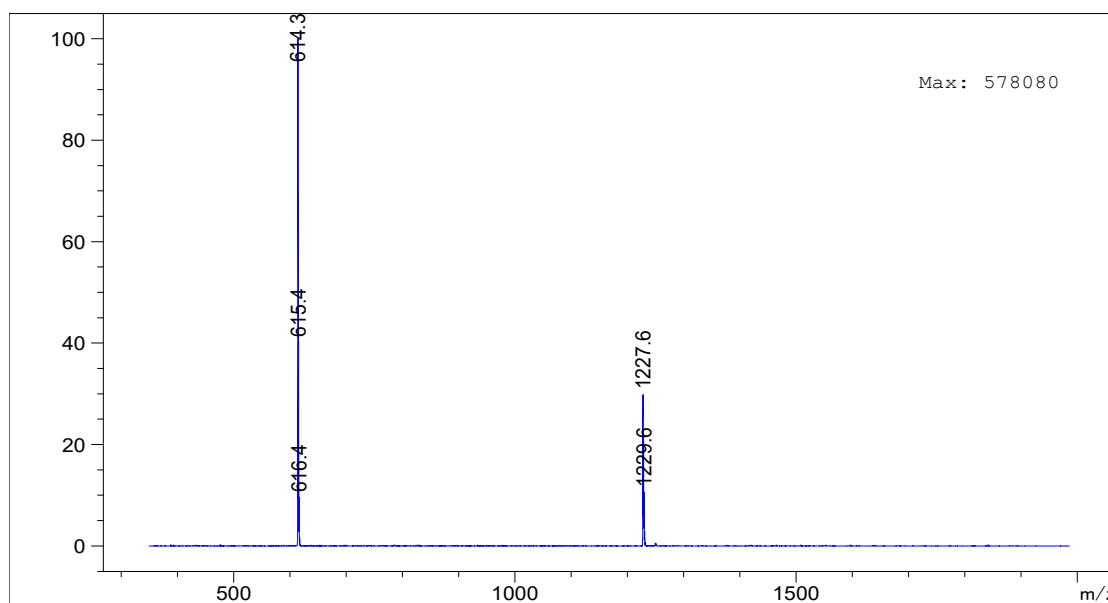

3. Compound **PV FY**: obsvd.  $[M+H^+] = 525.3$

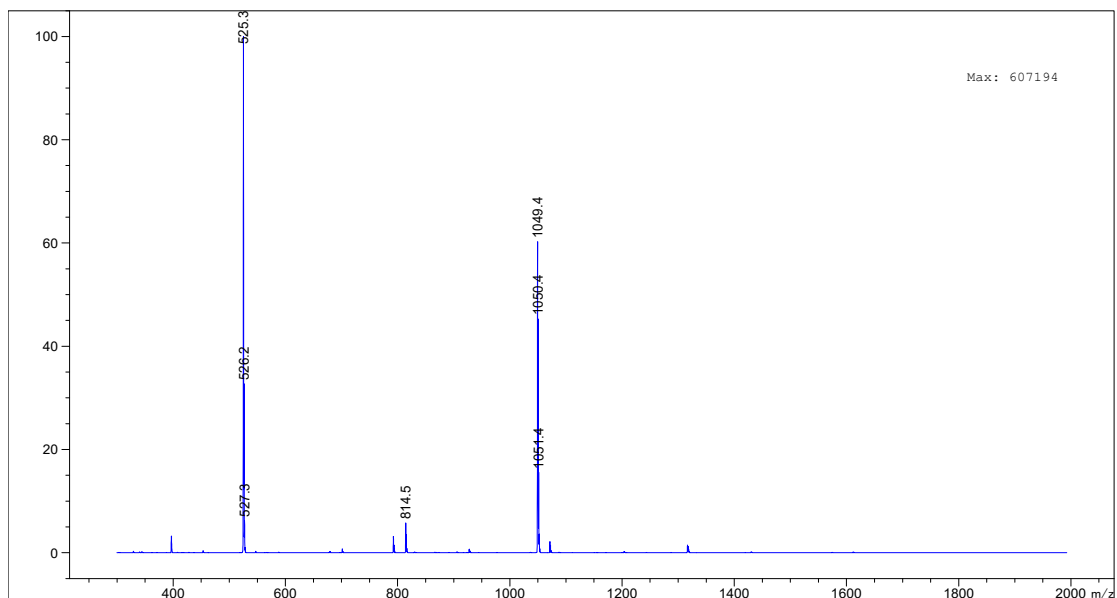

4. Compound **WAYF**: obsvd.  $[M+H]^+ = 586.2$

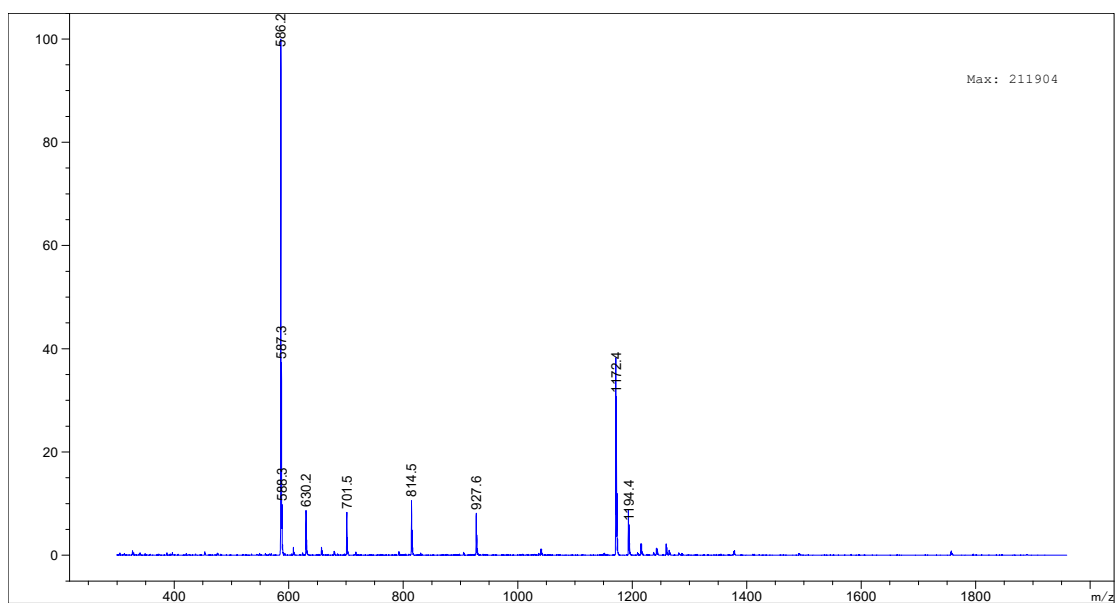

5. Compound **WEFF**: obsvd.  $[M+H]^+ = 628.2$

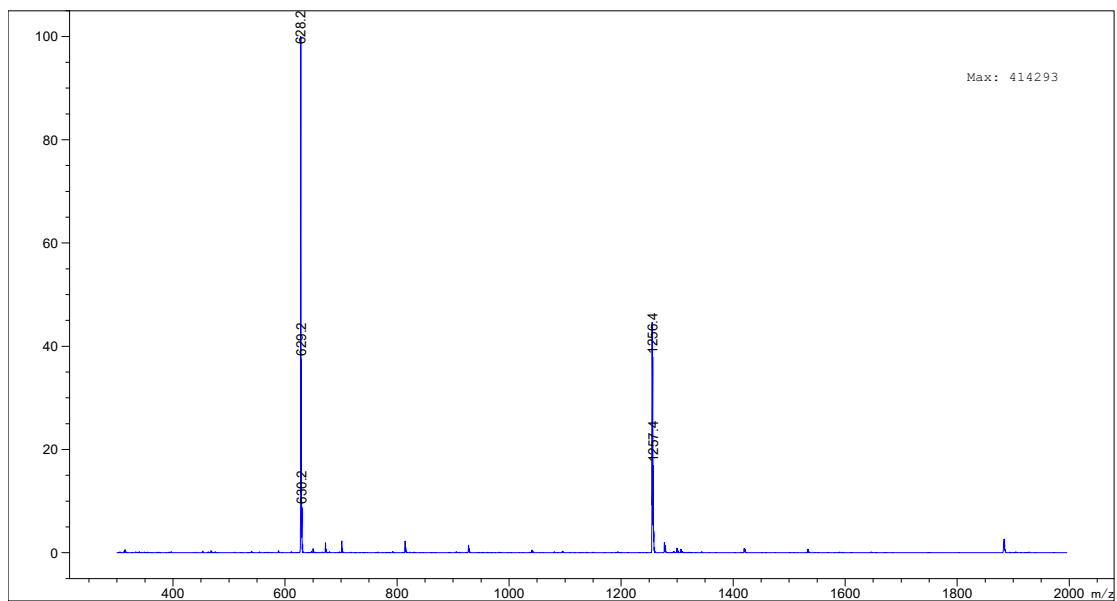

6. Compound **FKFF**: obsvd.  $[M+H^+] = 588.3$

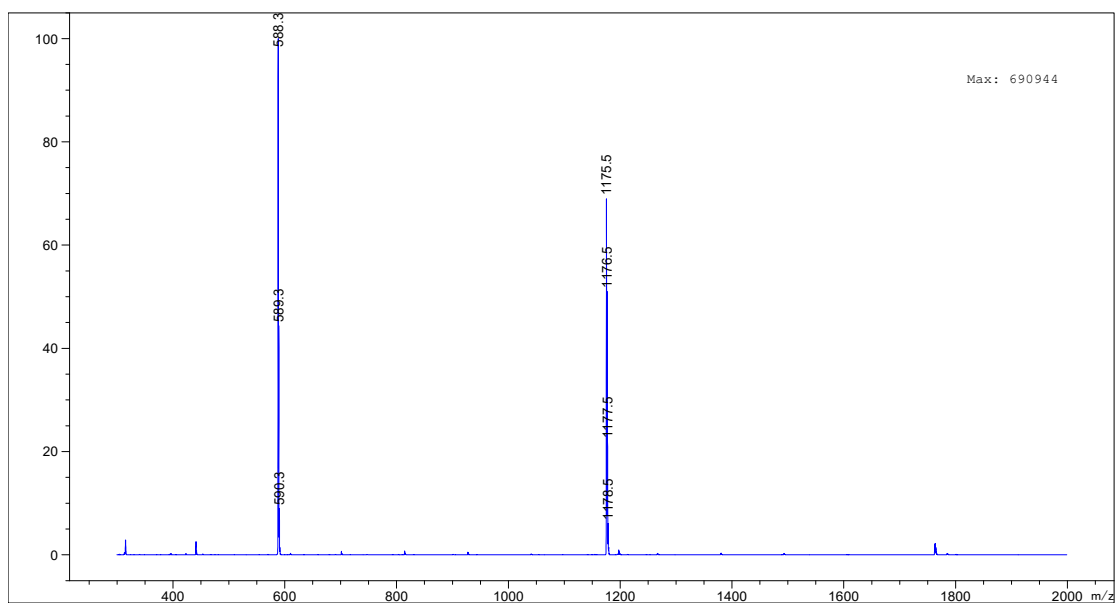

7. Compound **FKFW**: obsvd.  $[M+TFA^-] = 739.3$

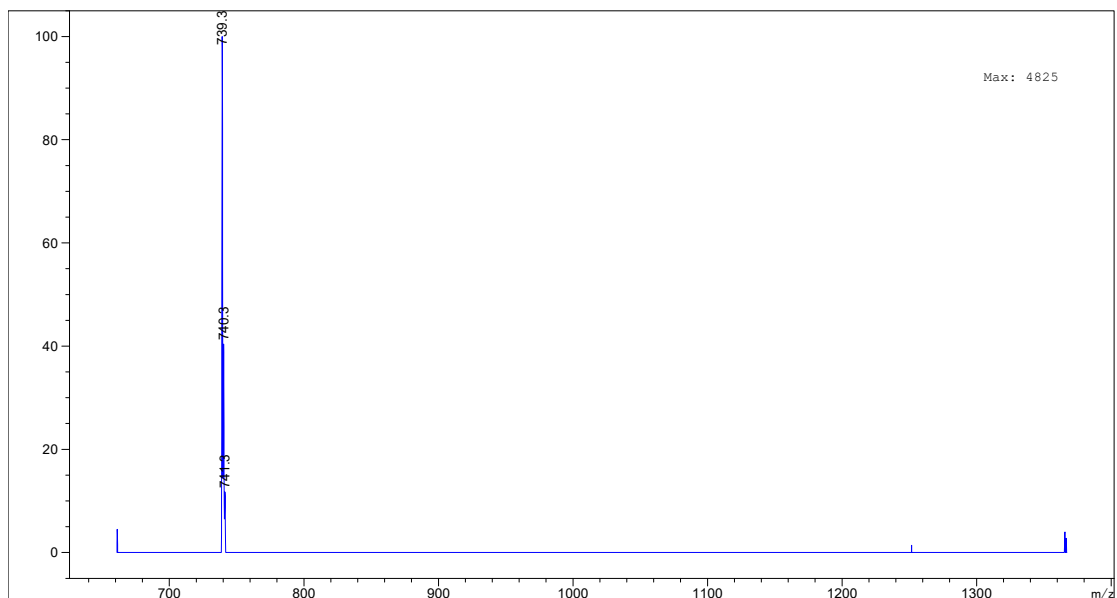

8. Compound **WKFF**: obsvd.  $[M+H]^+$  = 627.3

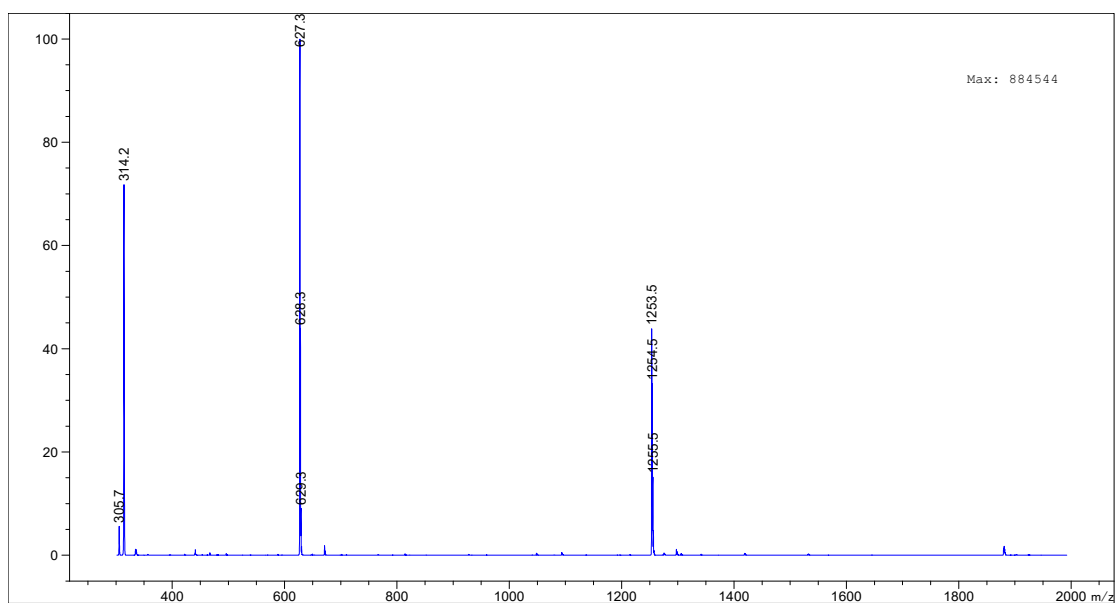

9. Compound **YAWF**: obsvd.  $[M+H]^+$  = 586.2

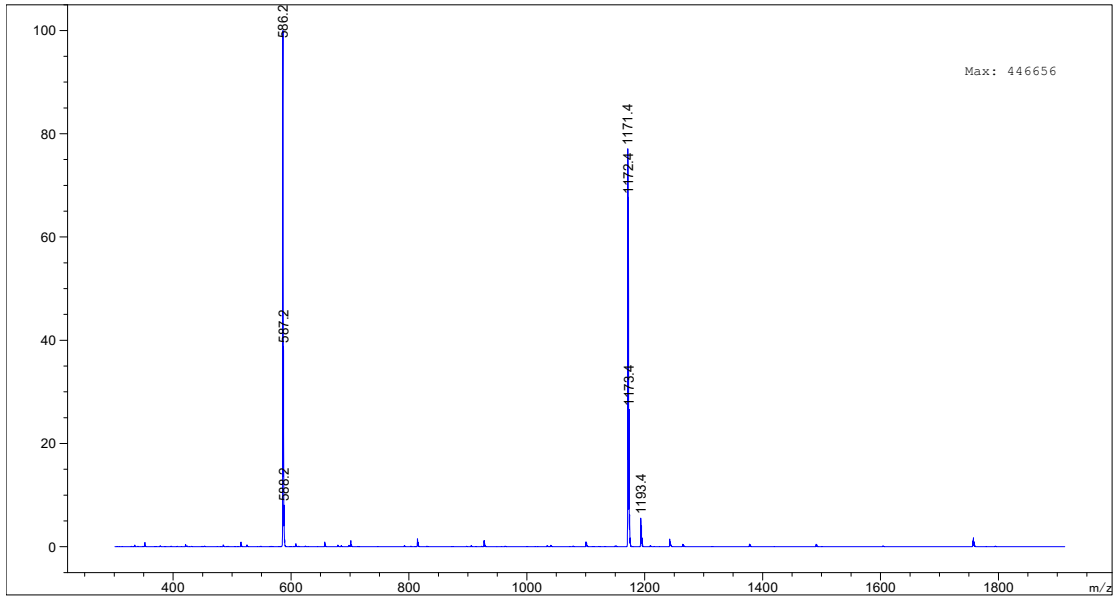

10. Compound FFFF: obsvd.  $[M+H^+] = 607.4$

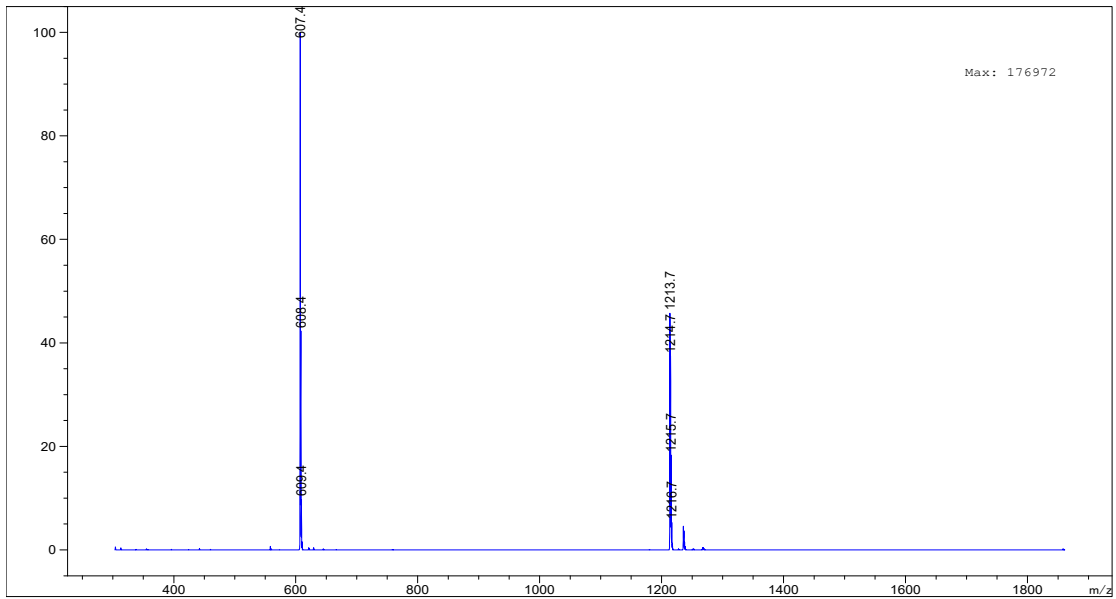

11. Compound IIII: obsvd.  $[M+H^+] = 471.5$

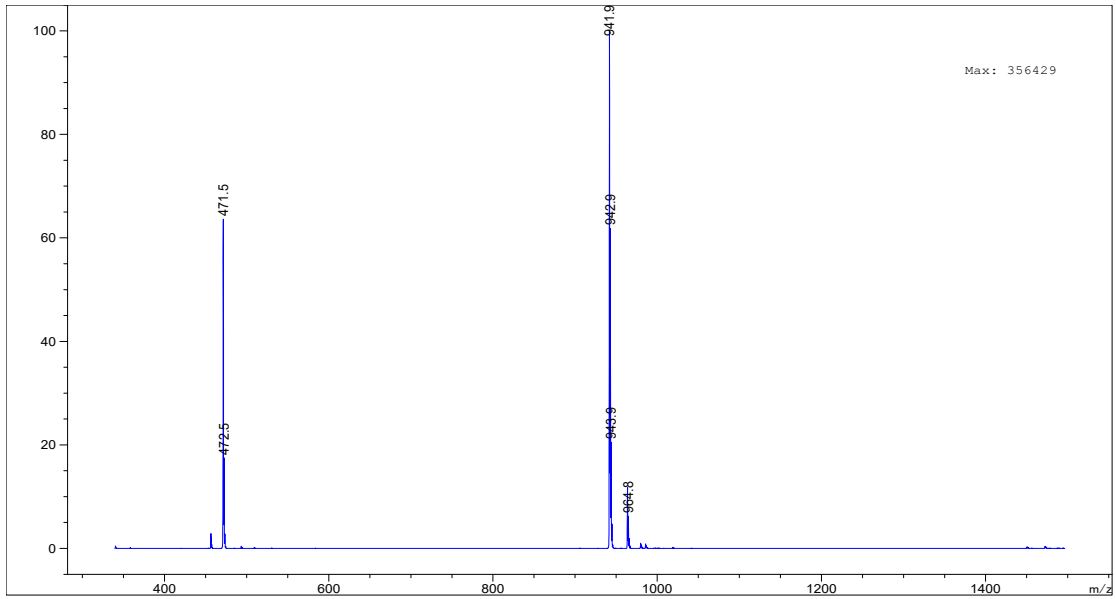

12. Compound **LLL**: obsvd.  $[M+H]^+ = 471.4$

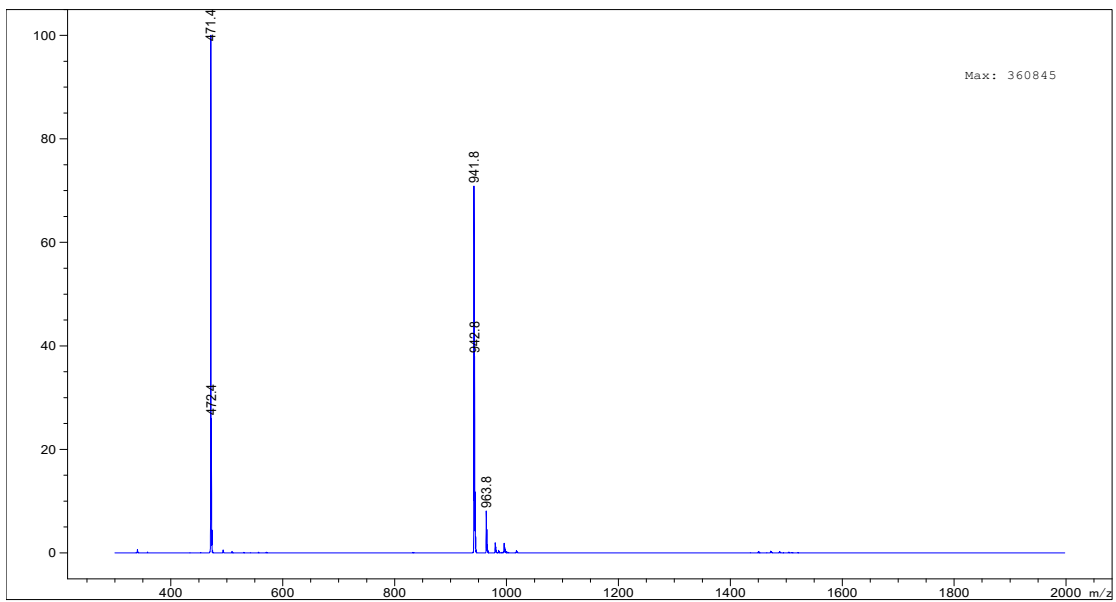

13. Compound **VVV**: obsvd.  $[M+H]^+ = 415.4$

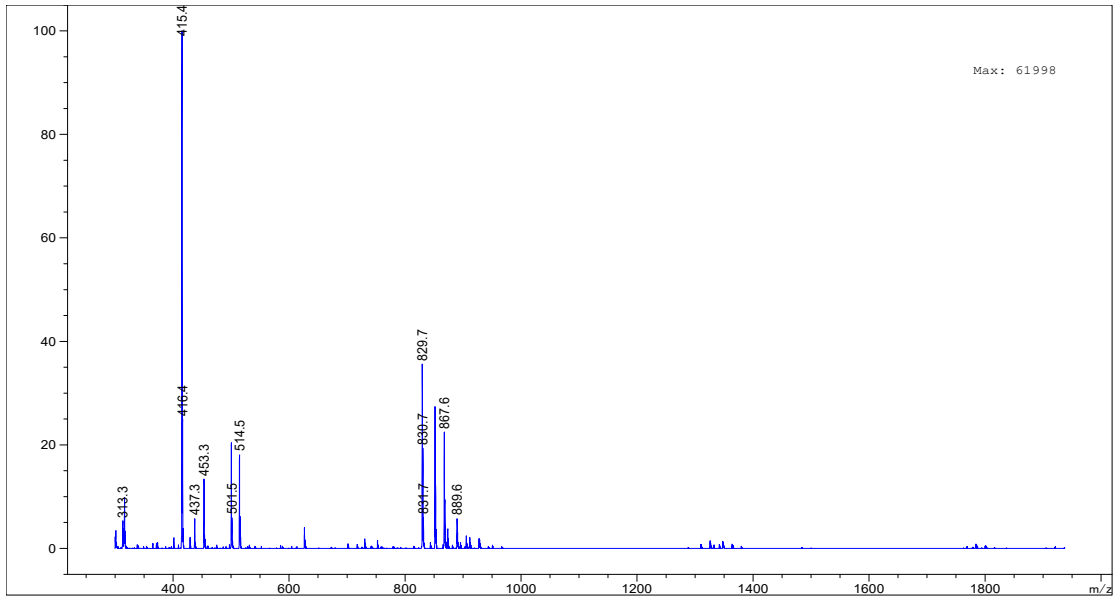

14. Compound **MMMM**: obsvd.  $[M+H]^+ = 543.1$

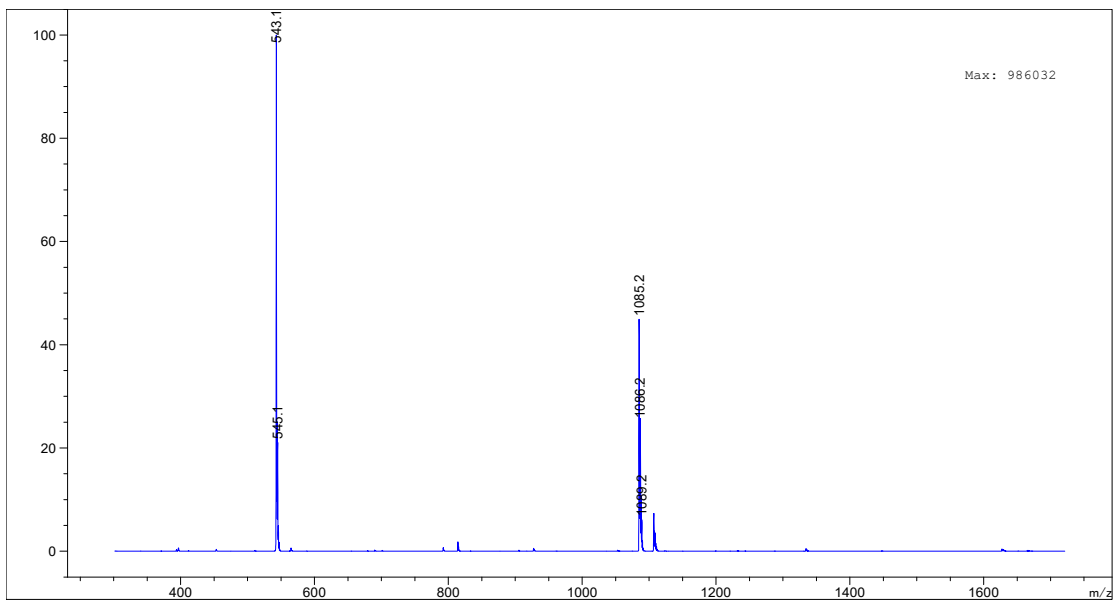

15. Compound **CHFW**: obsvd.  $[M+H]^+ = 592.2$

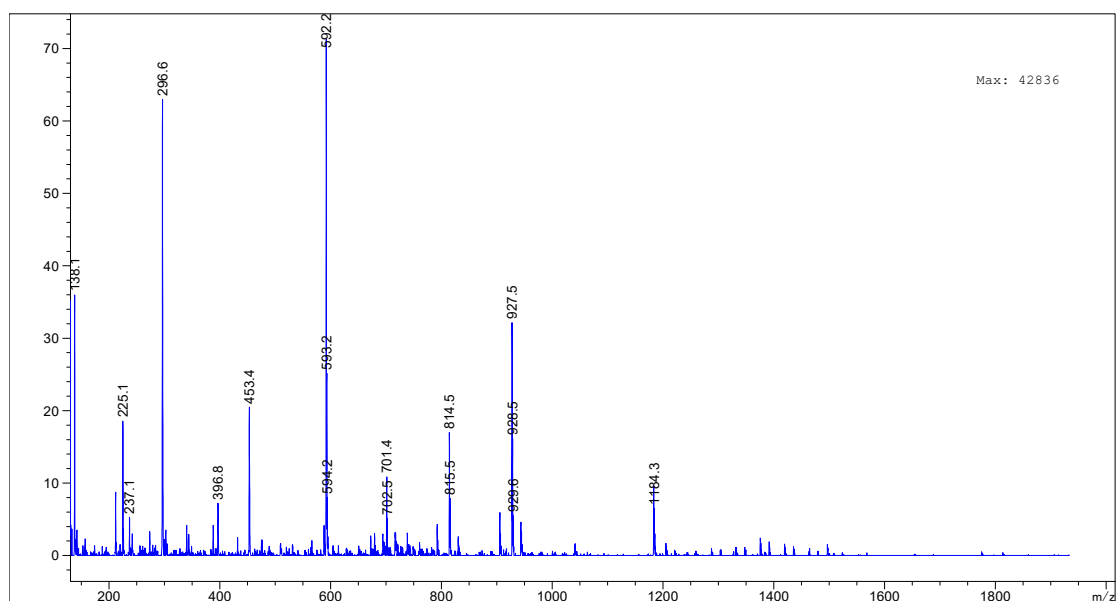

16. Compound DVFW: obsvd.  $[M+H]^+$  = 566.0

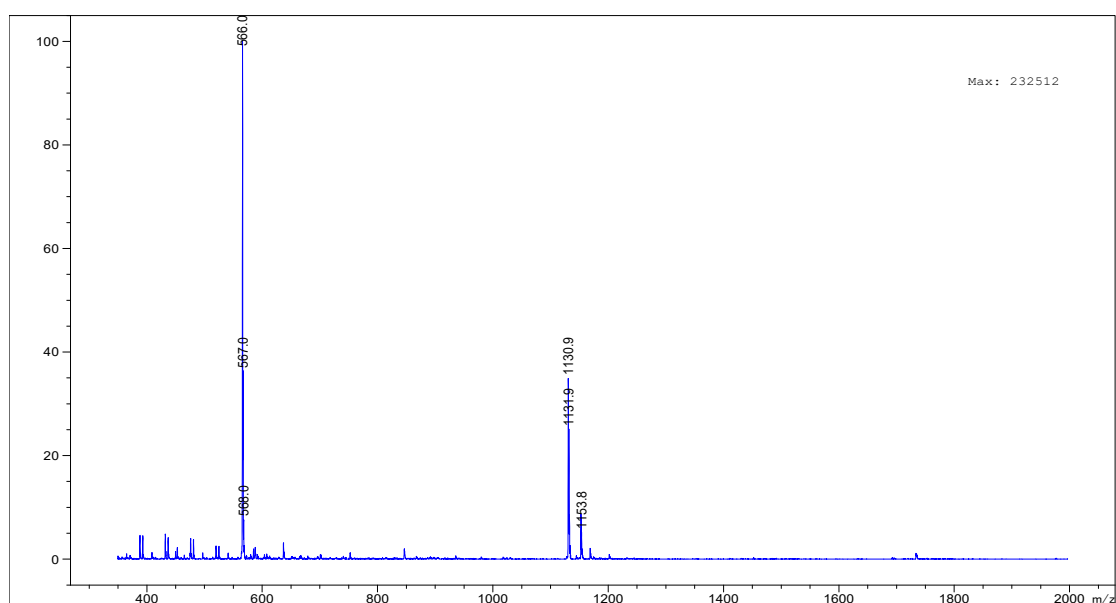

17. Compound NWWF: obsvd.  $[M+H]^+$  = 551.9



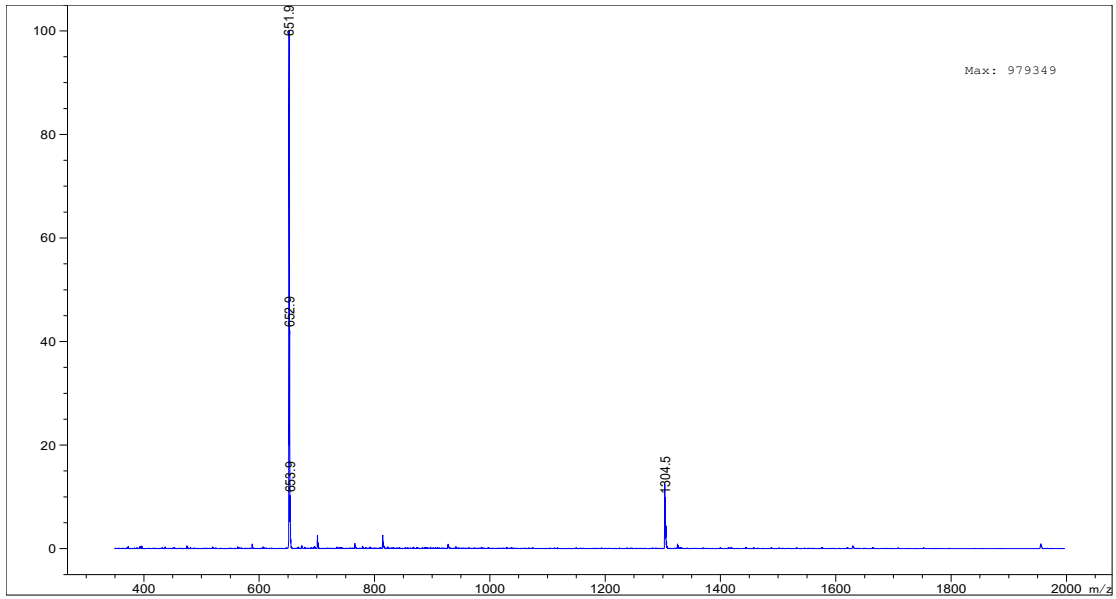

18. Compound LSFW: obsvd.  $[M+H^+] = 552.2$

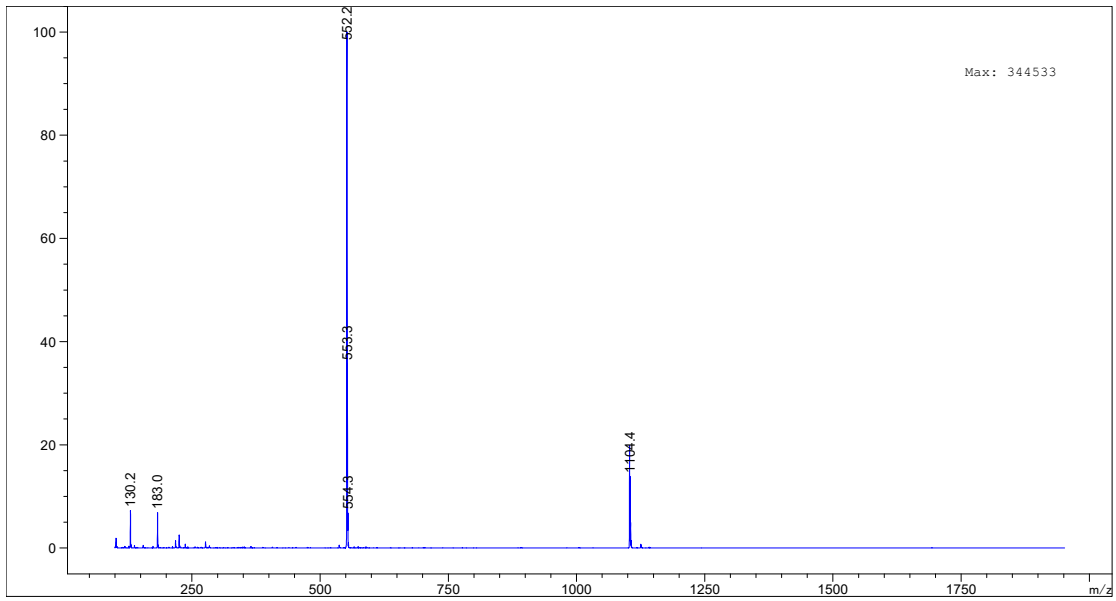

19. Compound LFWS: obsvd.  $[M+H^+] = 552.2$

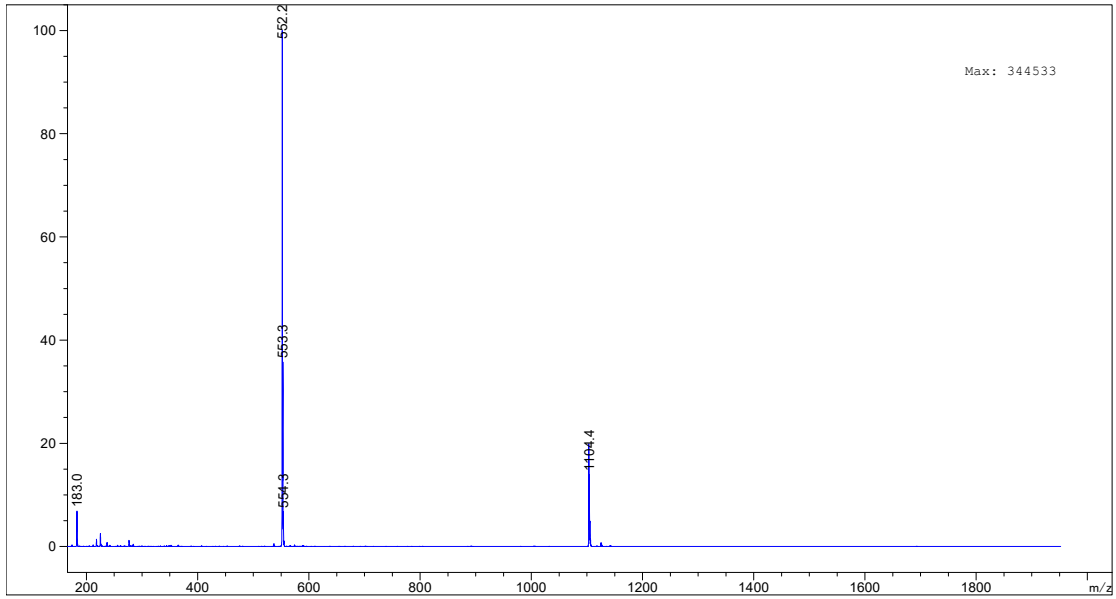

20. Compound CWHY: obsvd.  $[M+H^+] = 608.2$

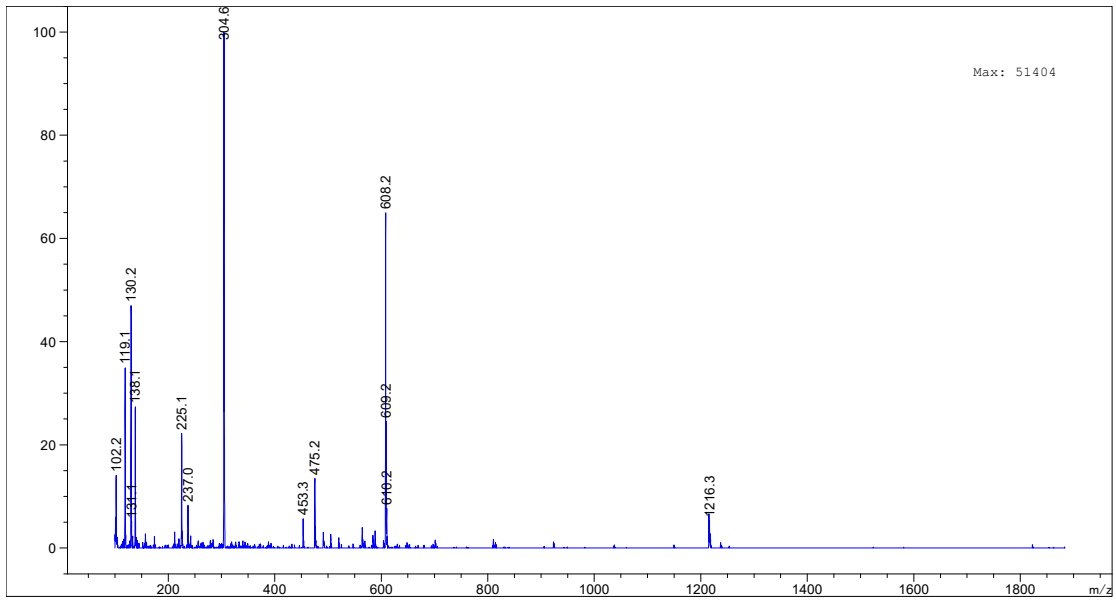

21. Compound WALW: obsvd.  $[M+H^+] = 575.3$

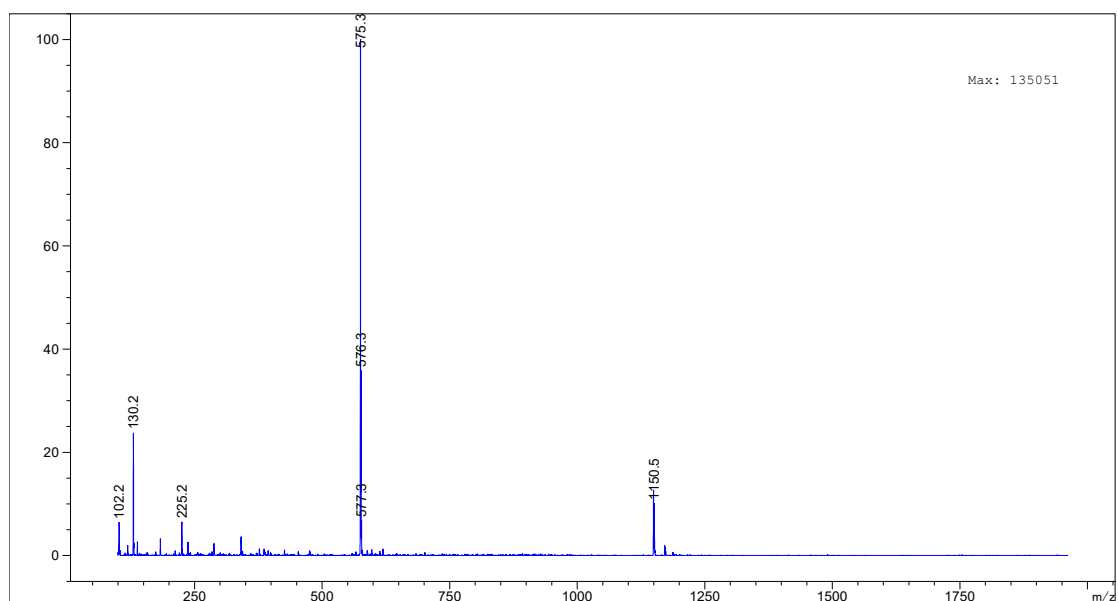

22. Compound **FFYY**: obsvd.  $[M+ TFA^-] = 751.1$

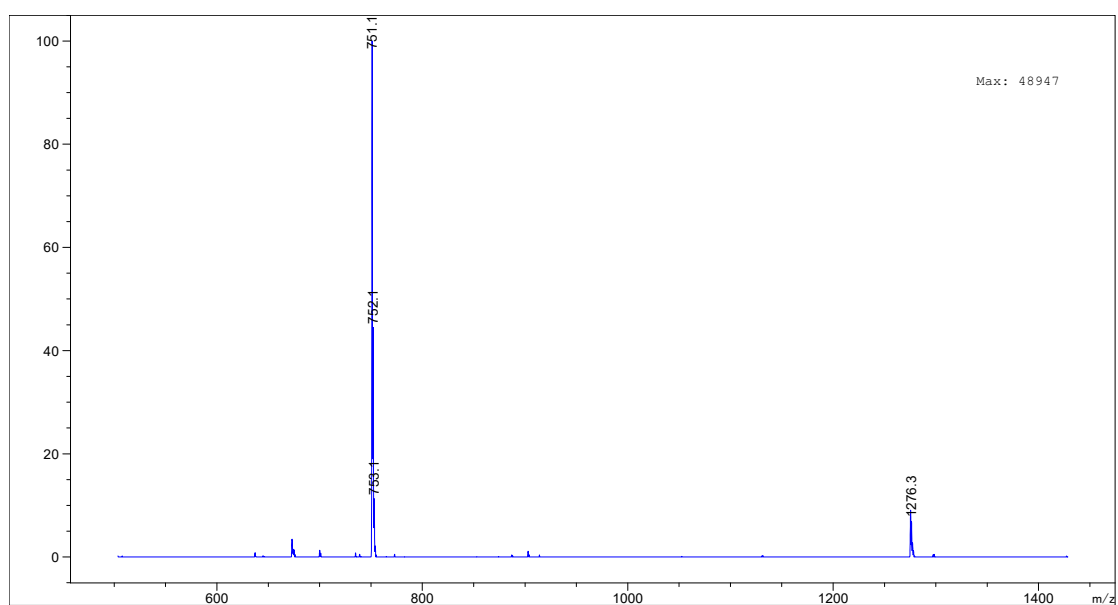

23. Compound **WYFF**: obsvd.  $[M+ TFA^-] = 774.1$

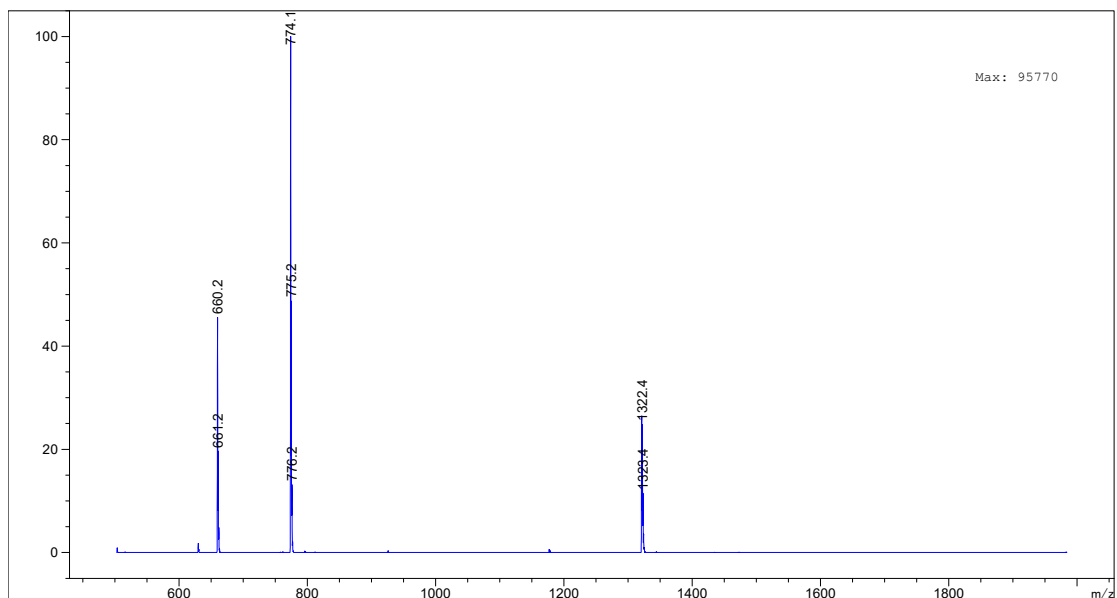

24. Compound **LVFF**: obsvd.  $[M+ TFA^-] = 637.2$

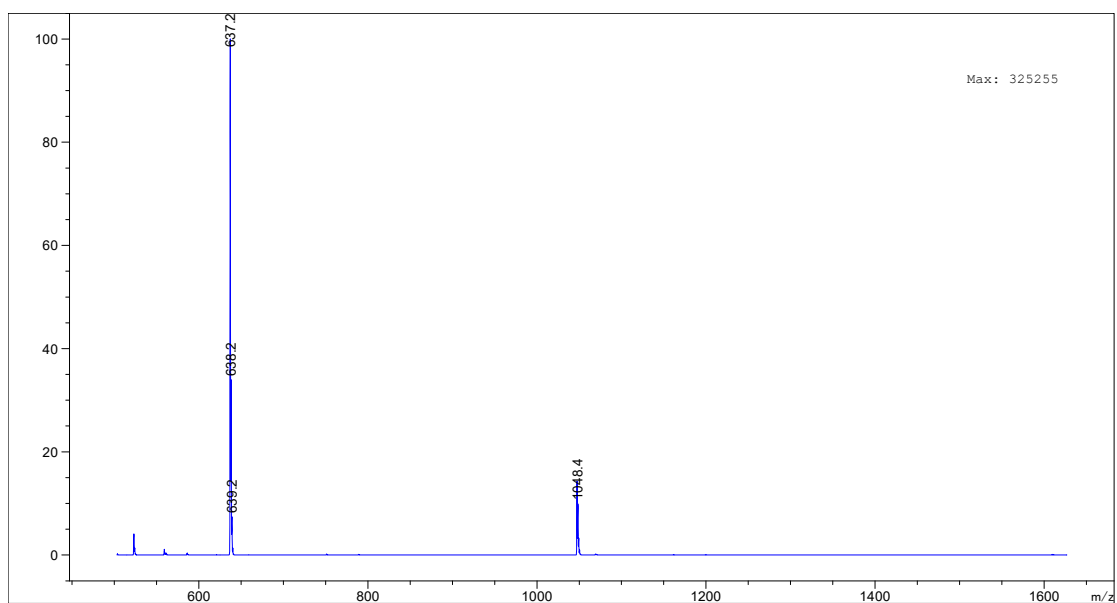

25. Compound **GFFY**: obsvd.  $[M+ TFA^-] = 645.1$

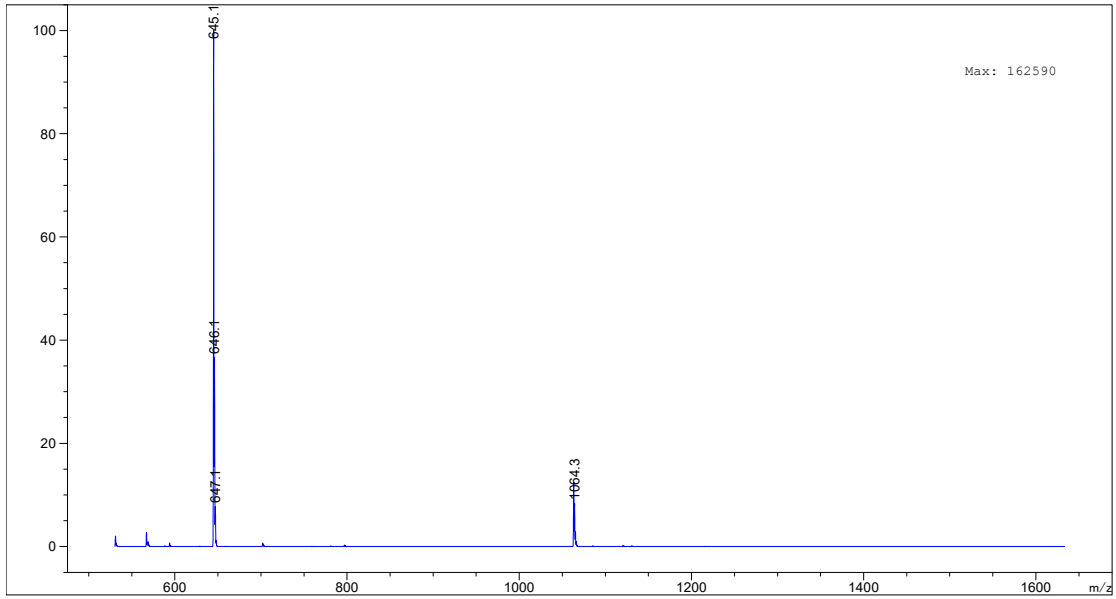

26. Compound TAVF: obsvd.  $[M+H]^+ = 437.1$

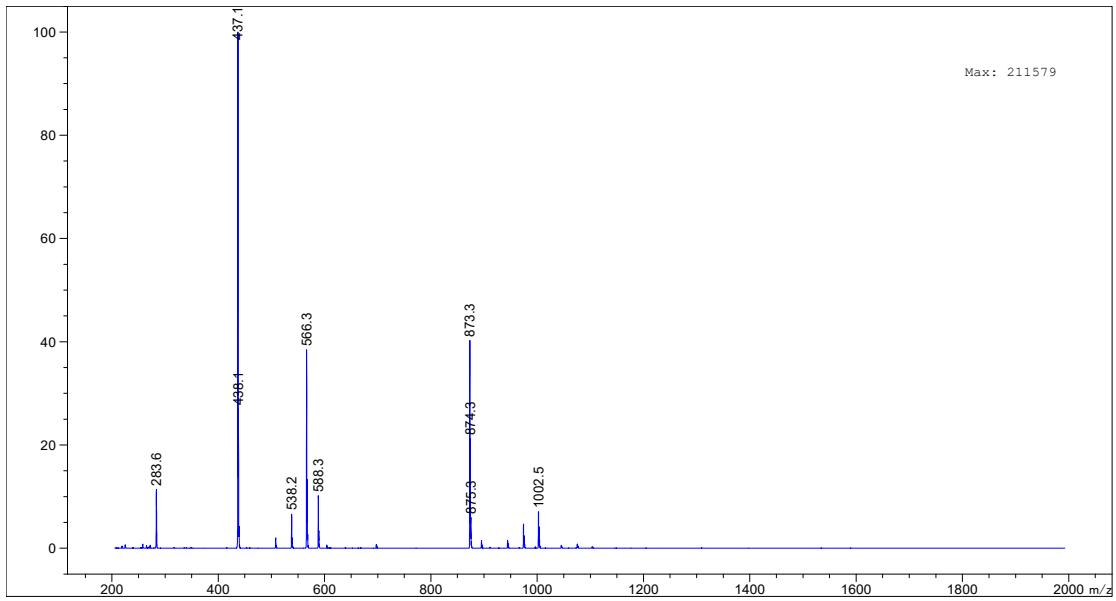

27. Compound WFMM: obsvd.  $[M+H]^+ = 527.2$

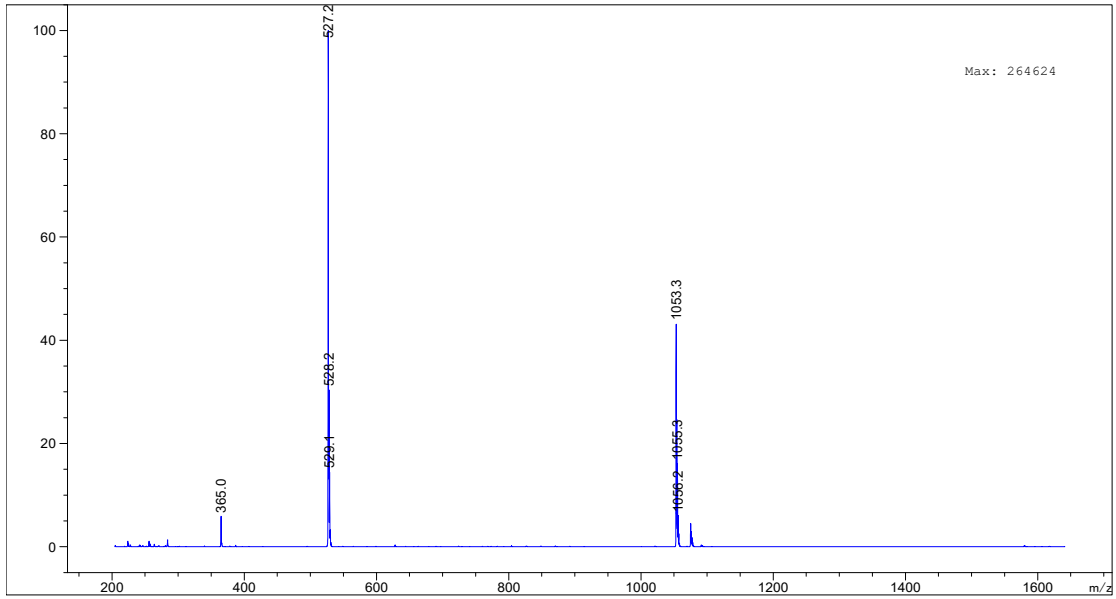

28. Compound YVFA: obsvd.  $[M+H]^+ = 499.2$

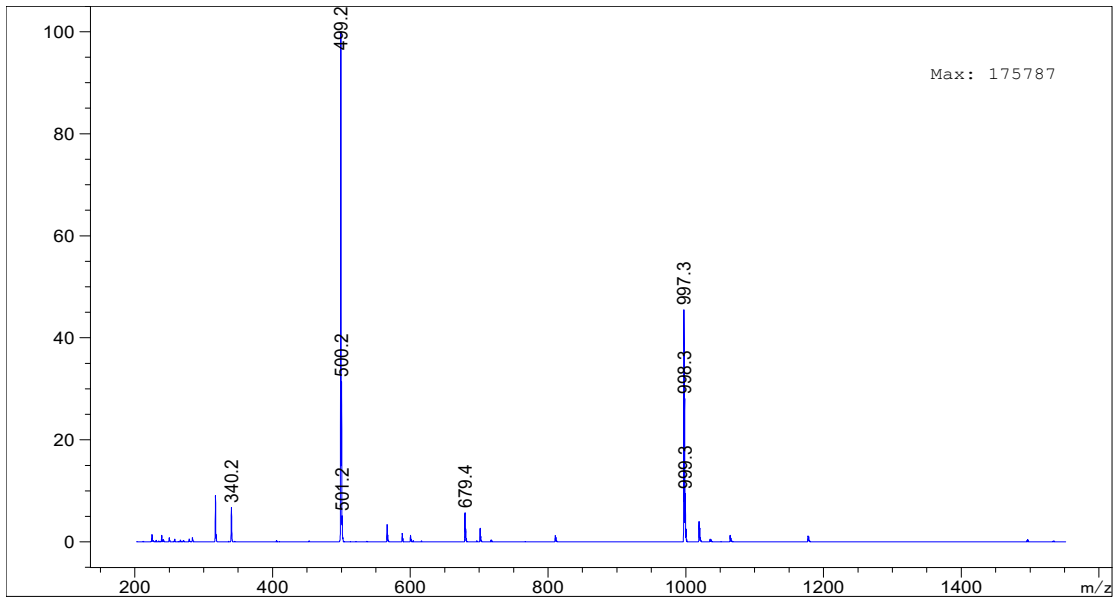

29. Compound LVFG: obsvd.  $[M+H]^+ = 435.2$

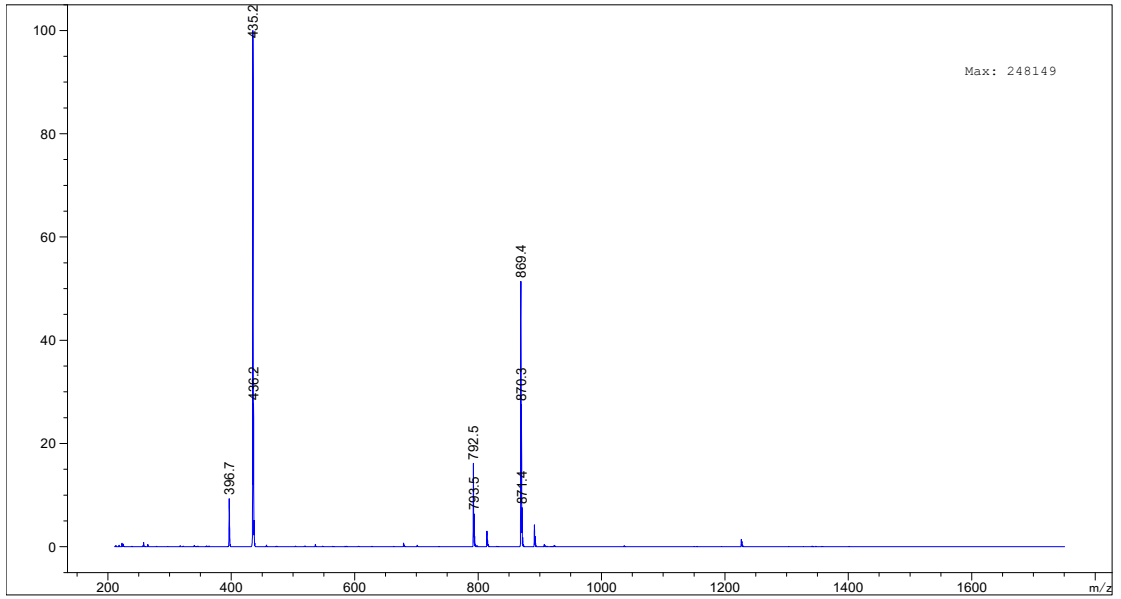

30. Compound **MVFP**: obsvd.  $[M+H]^+ = 493.2$

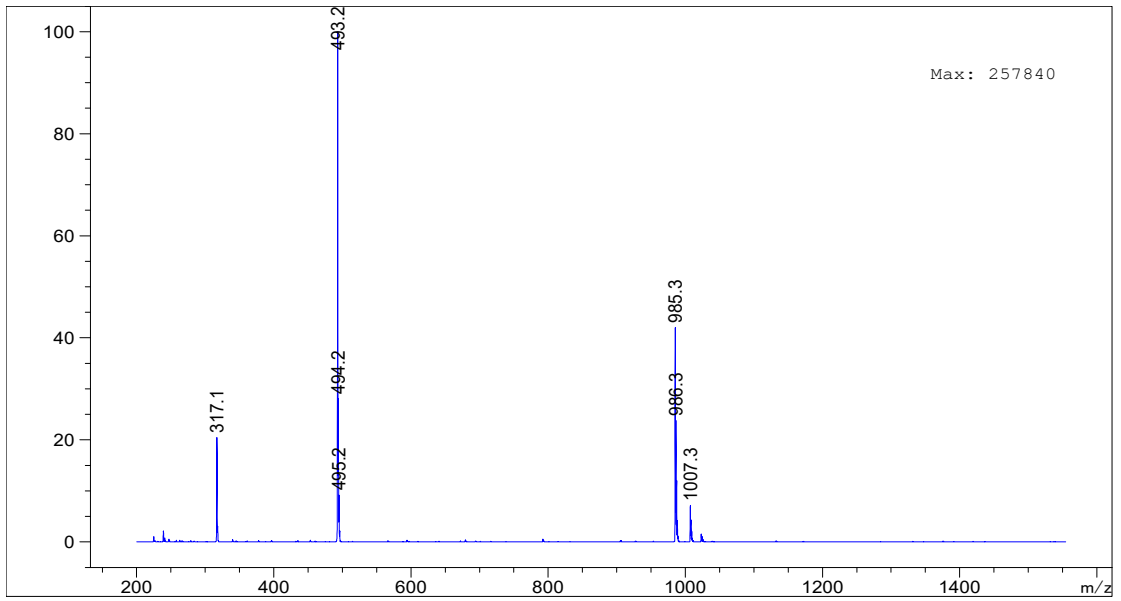

31. Compound **FMLF**: obsvd.  $[M+H]^+ = 557.2$

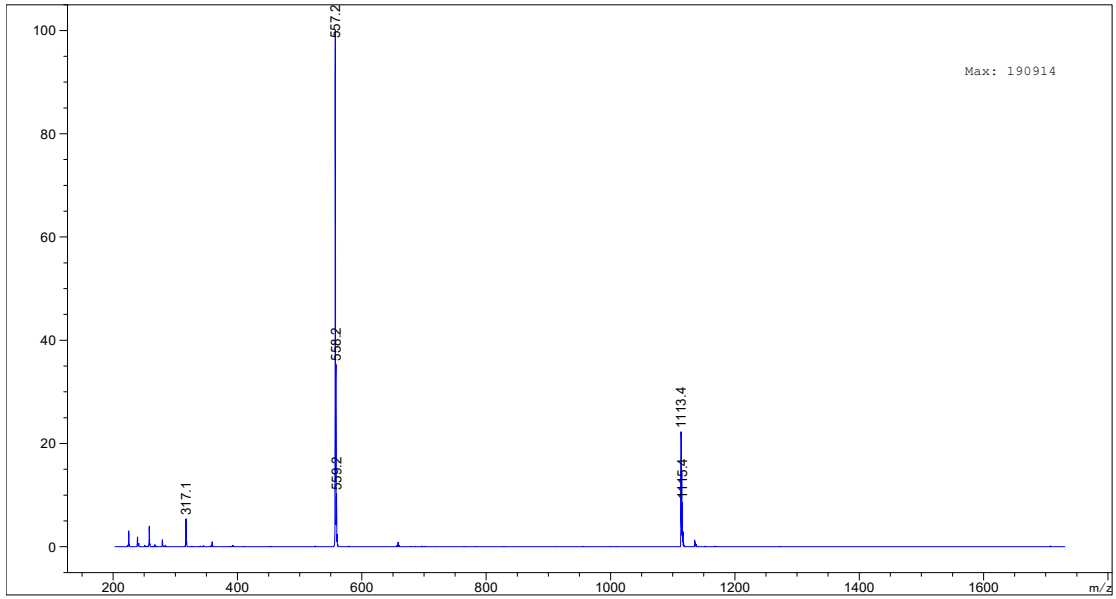

32. Compound **LLS**: obsvd.  $[M+H]^+ = 445.2$

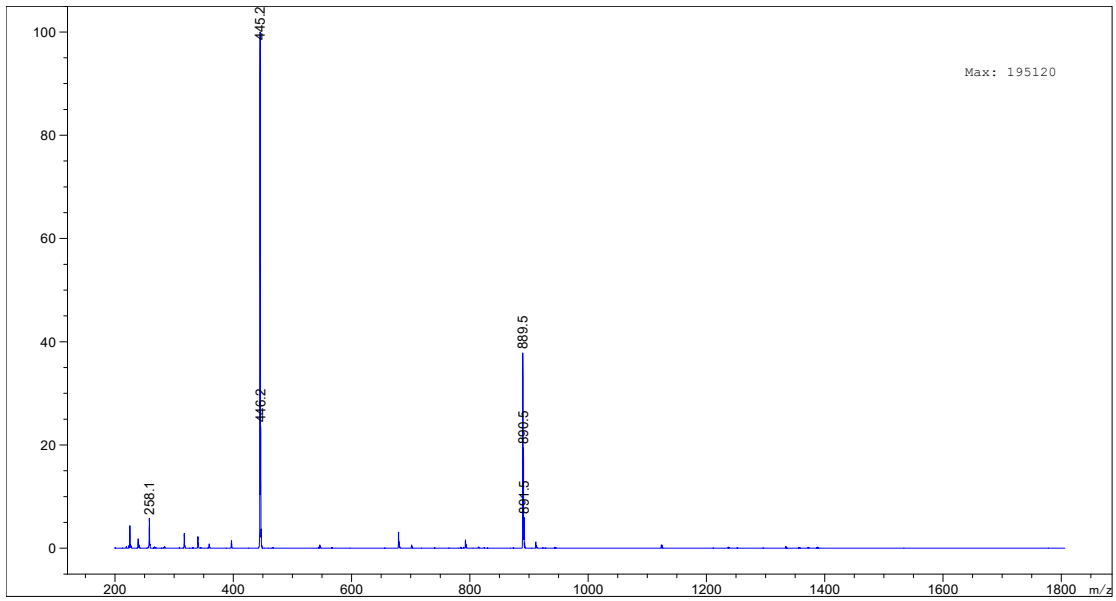

33. Compound **IFYT**: obsvd.  $[M+H]^+ = 543.2$



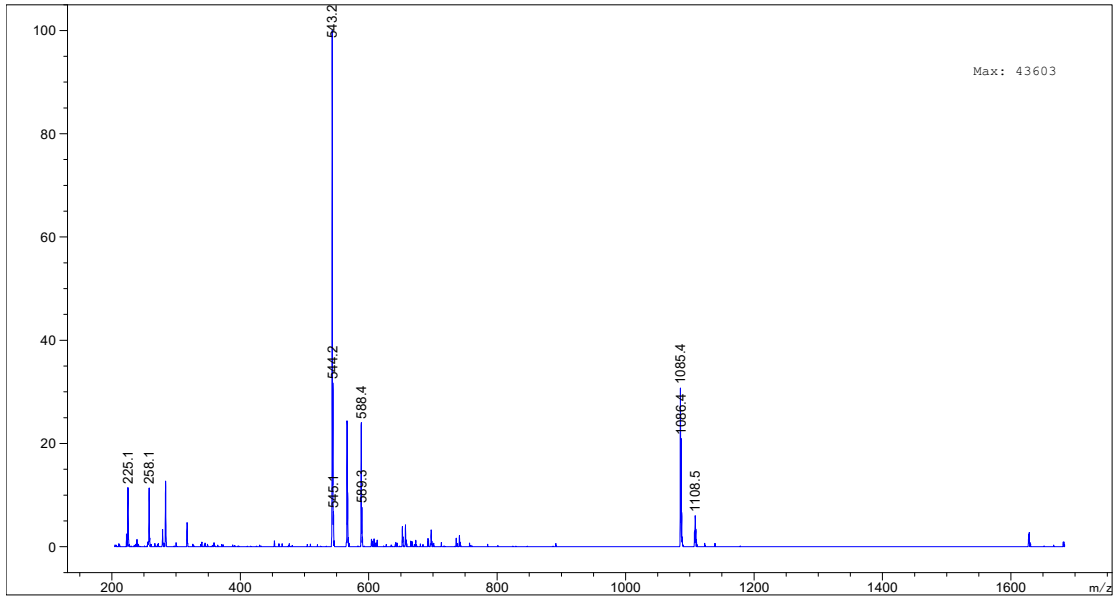

34. Compound **LLSL**: obsvd.  $[M+H]^+ = 445.3$

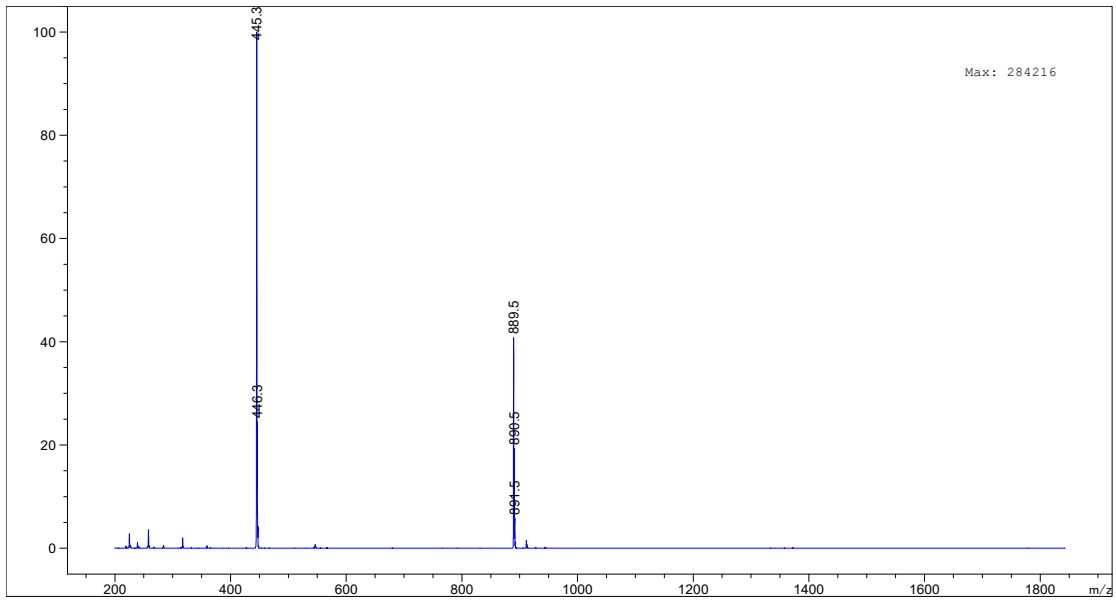

35. Compound **WLVW**: obsvd.  $[M+H]^+ = 603.3$

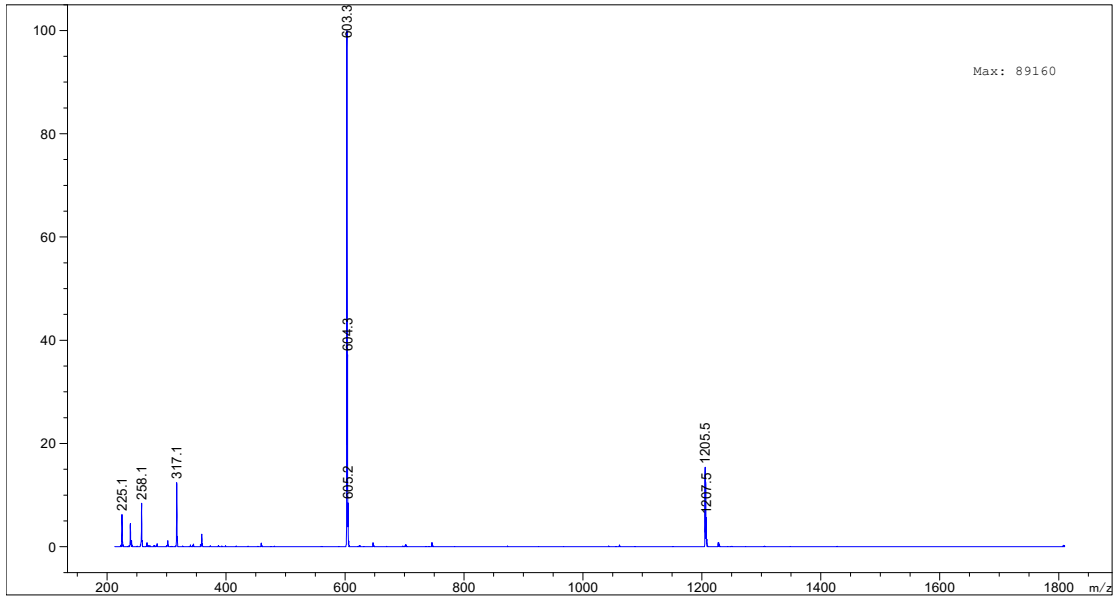

36. Compound **LWVF**: obsvd.  $[M+H^+] = 651.3$

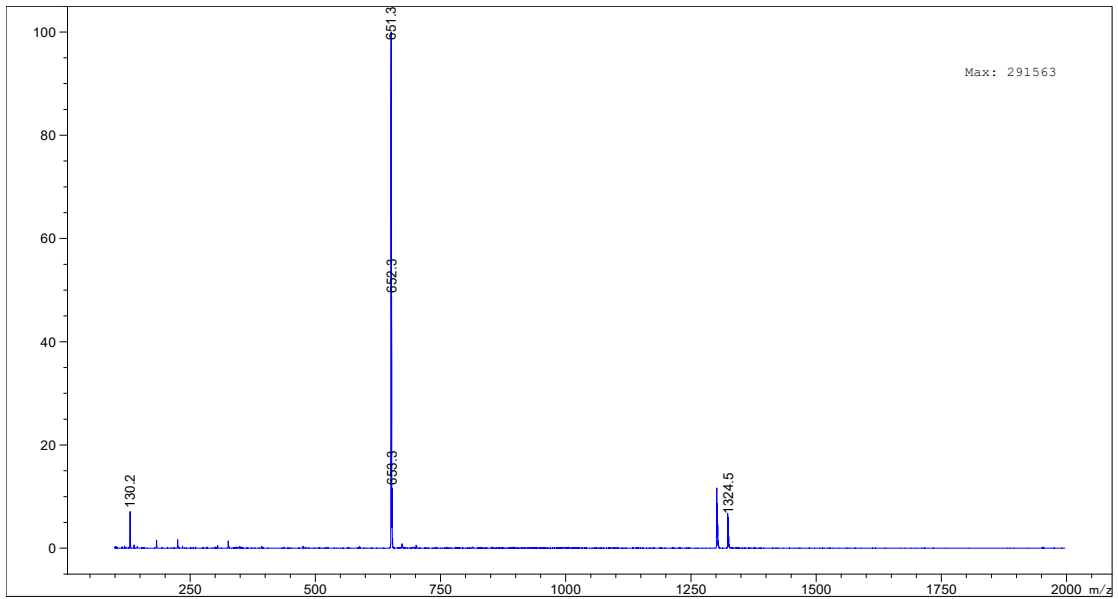

37. Compound **VFVF**: obsvd.  $[M+TFA^-] = 622.5$

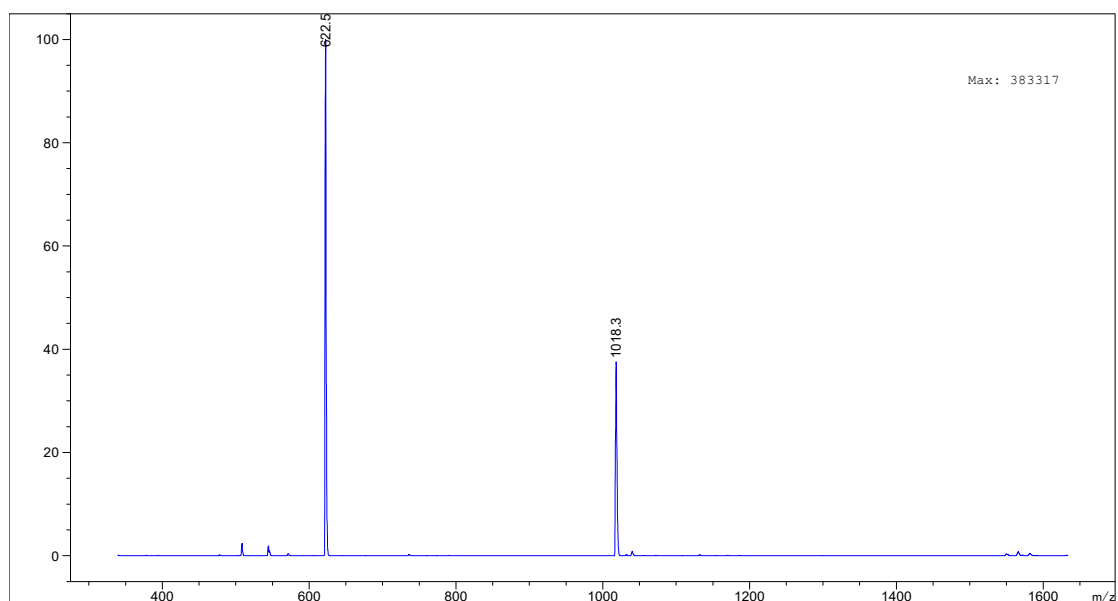

38. Compound **MMVV**: obsvd.  $[M+TFA^-] = 590.4$

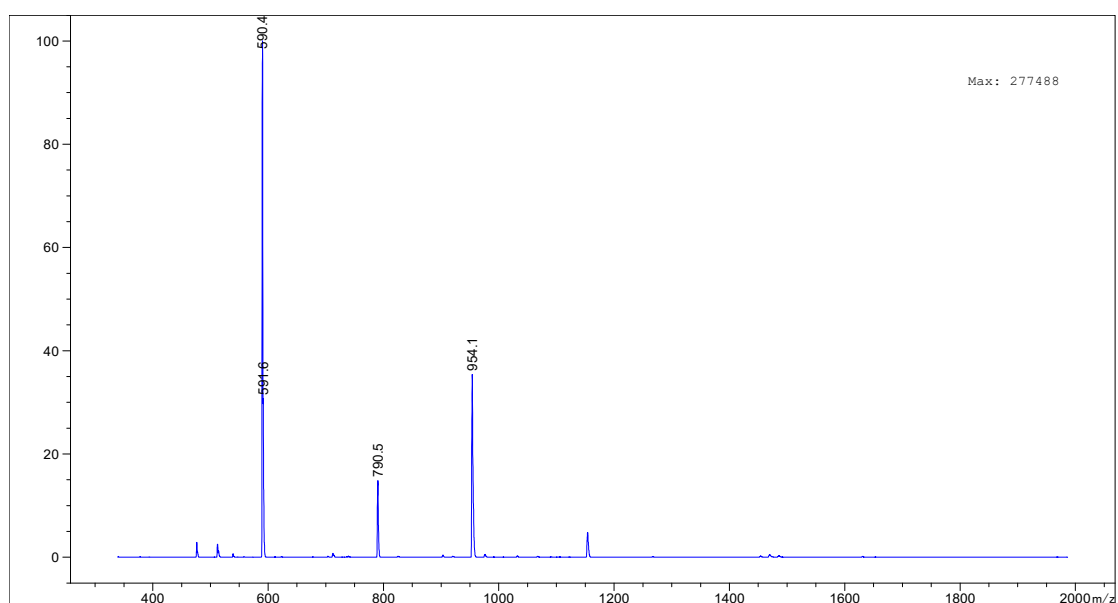

39. Compound **LVAI**: obsvd.  $[M+TFA^-] = 526.5$

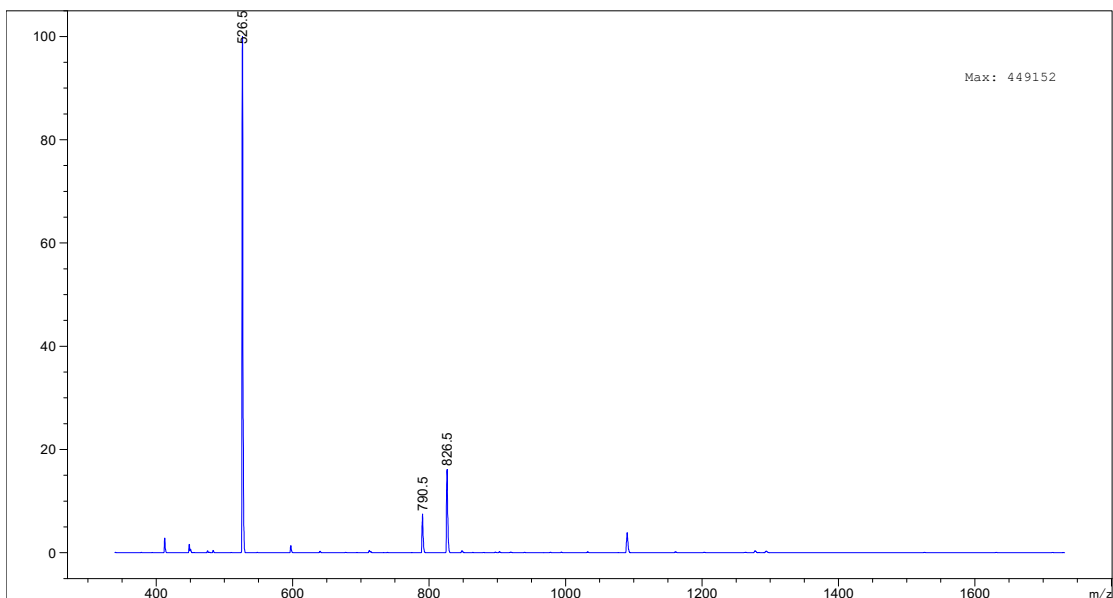

40. Compound WAVV: obsvd.  $[M+H]^+$  = 474.5

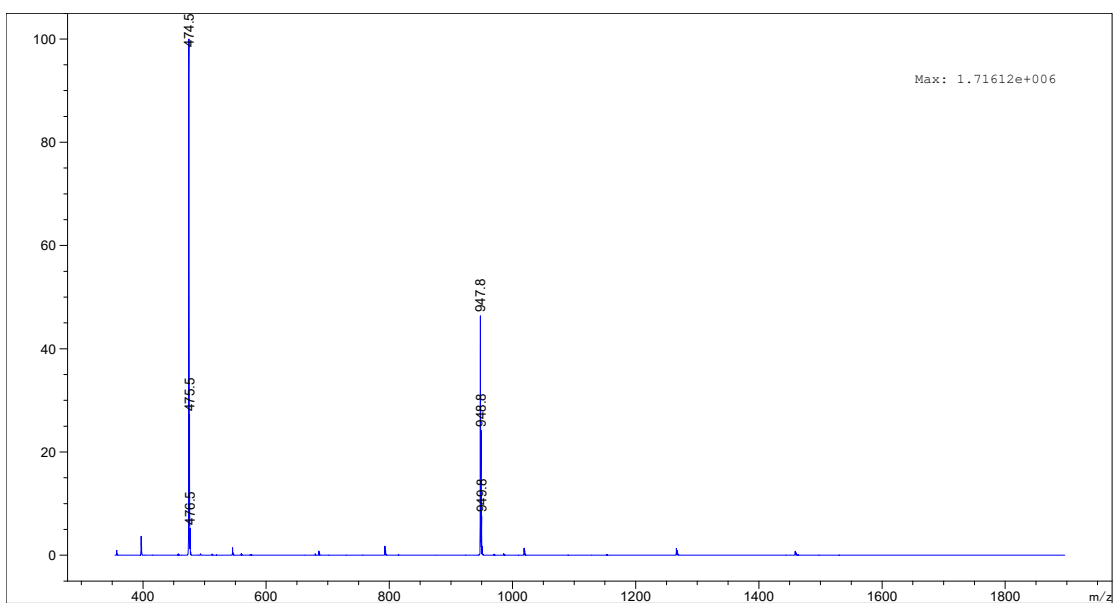

41. Compound MMLL: obsvd.  $[M+TFA]^-$  = 618.5

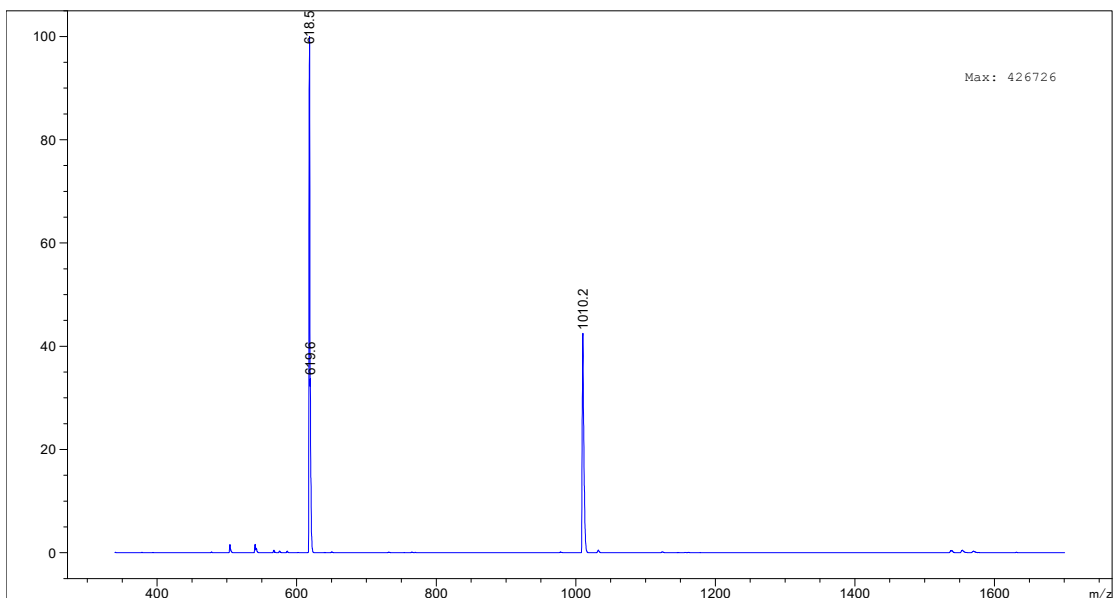

42. Compound **SWYF**: obsvd.  $[M+H^+] = 602.7$

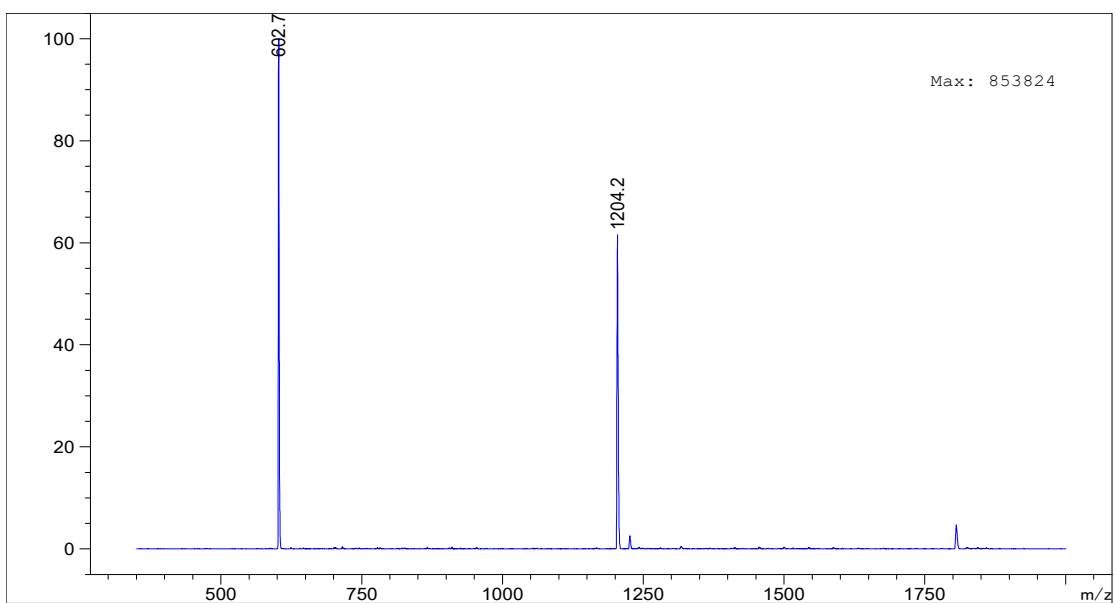

43. Compound **WWMF**: obsvd.  $[M+H^+] = 668.9$

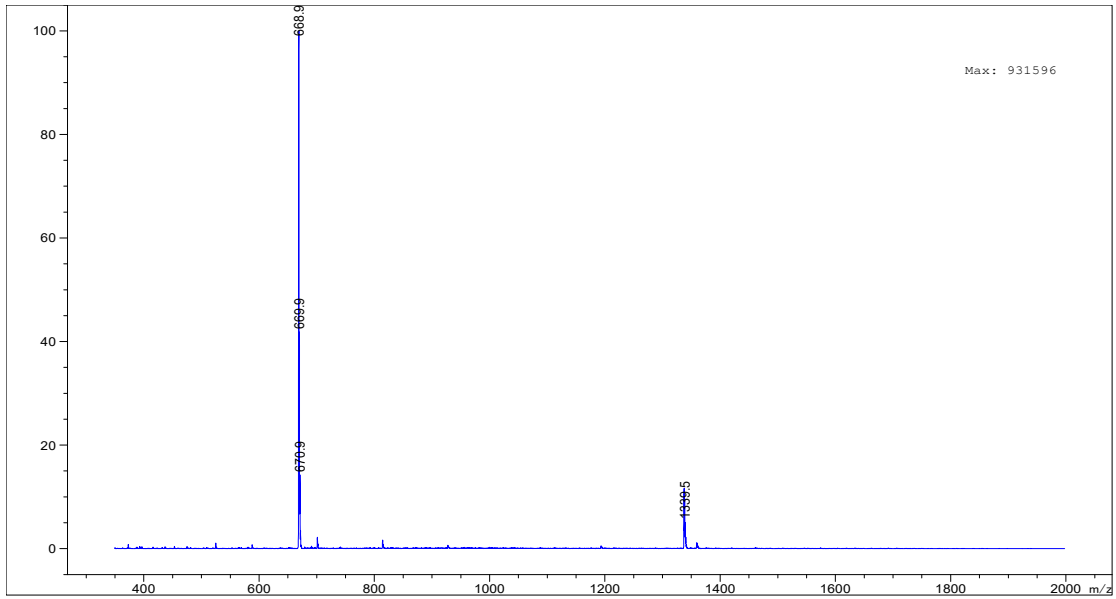

44. Compound SYFF: obsvd.  $[M+H]^+$  = 563.5

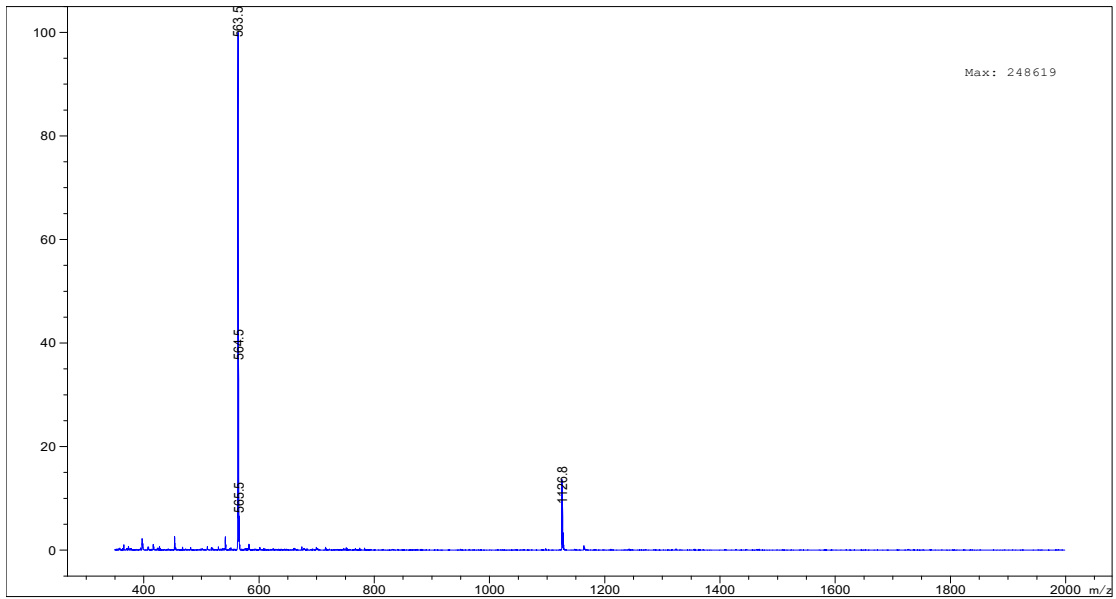

45. Compound WFMM: obsvd.  $[M+H]^+$  = 613.8

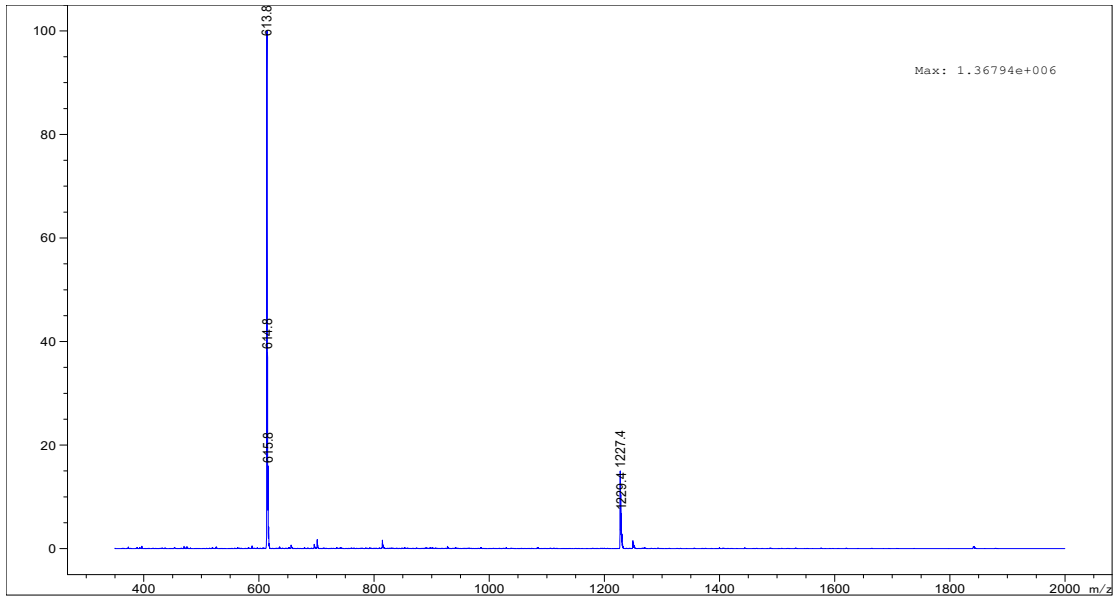

46. Compound CWFS: obsvd.  $[M+H]^+$  = 541.9

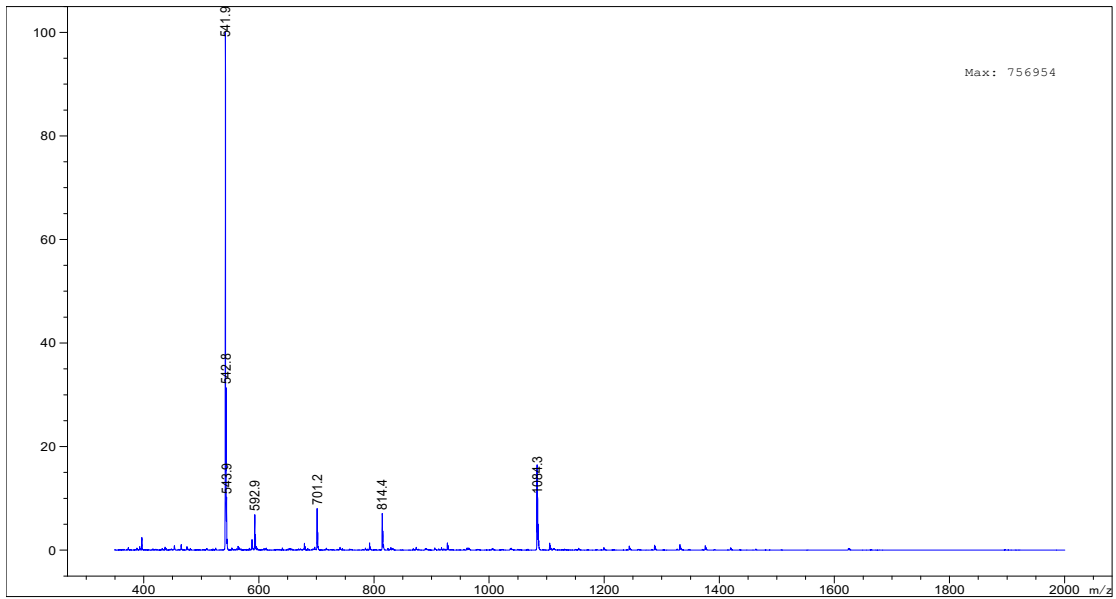

47. Compound PWYW: obsvd.  $[M+H]^+$  = 651.4

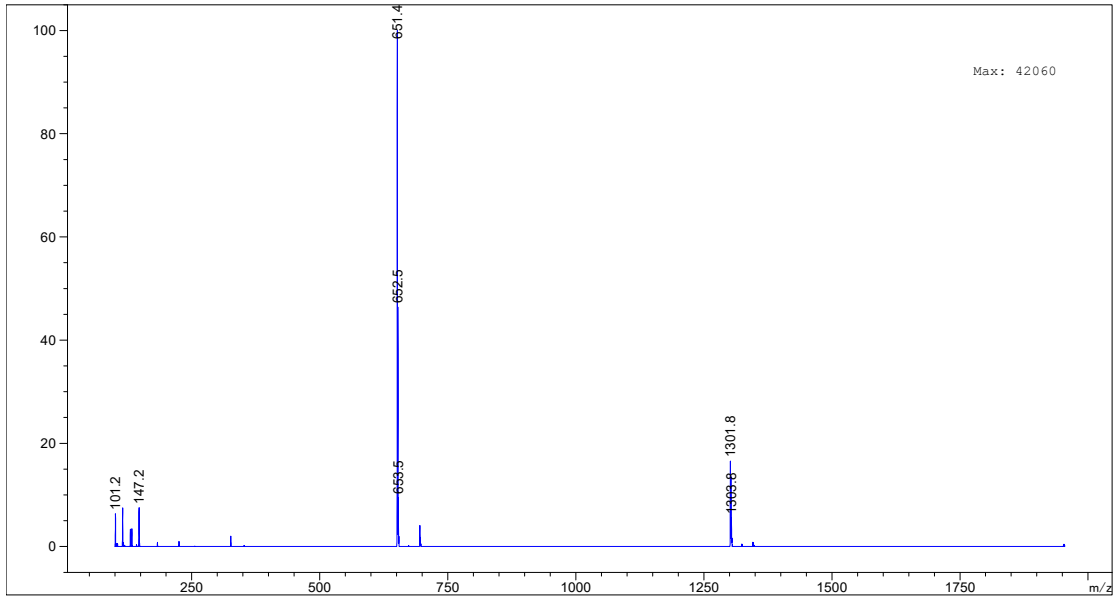

48. Compound KVWL: obsvd.  $[M+H]^+$  = 545.0

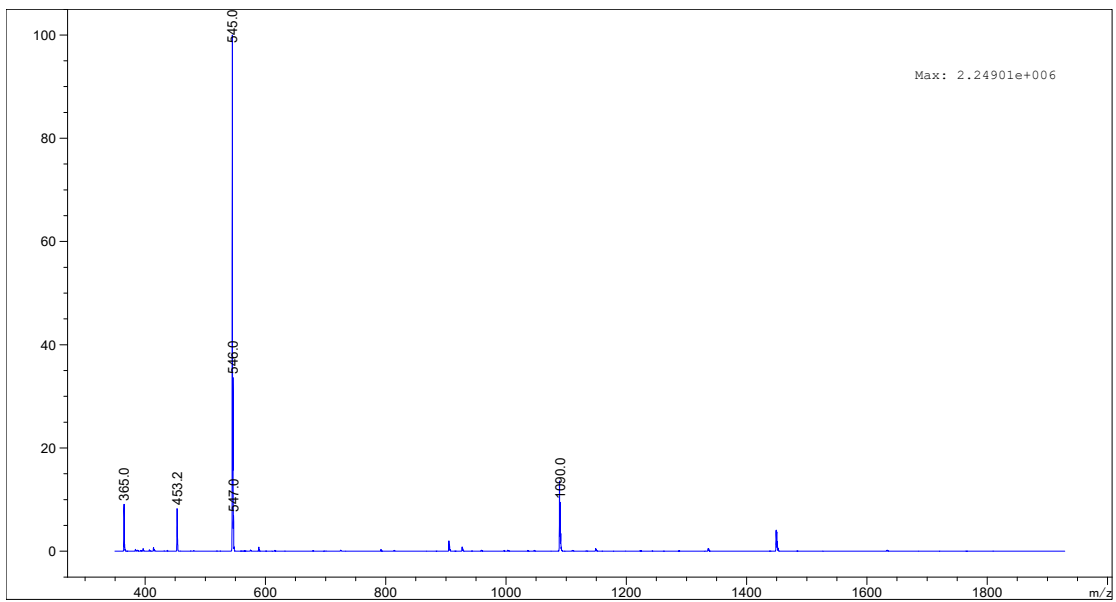

49. Compound FYAY: obsvd.  $[M+H]^+$  = 562.9



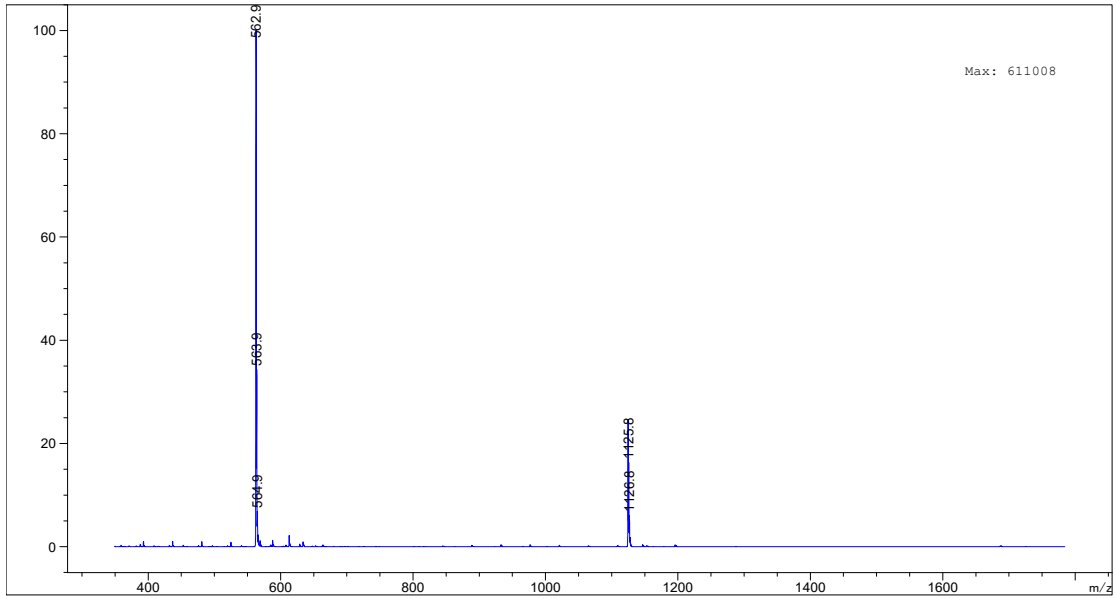

50. Compound **KLLF**: obsvd.  $[M+H]^+ = 520.0$

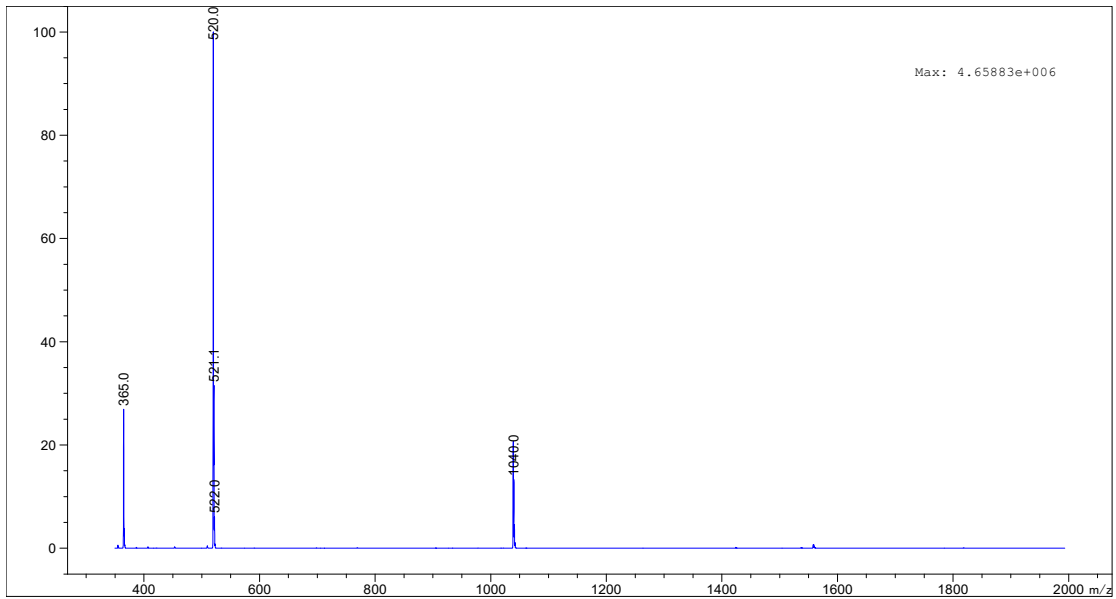

51. Compound **SAWF**: obsvd.  $[M+H]^+ = 509.9$

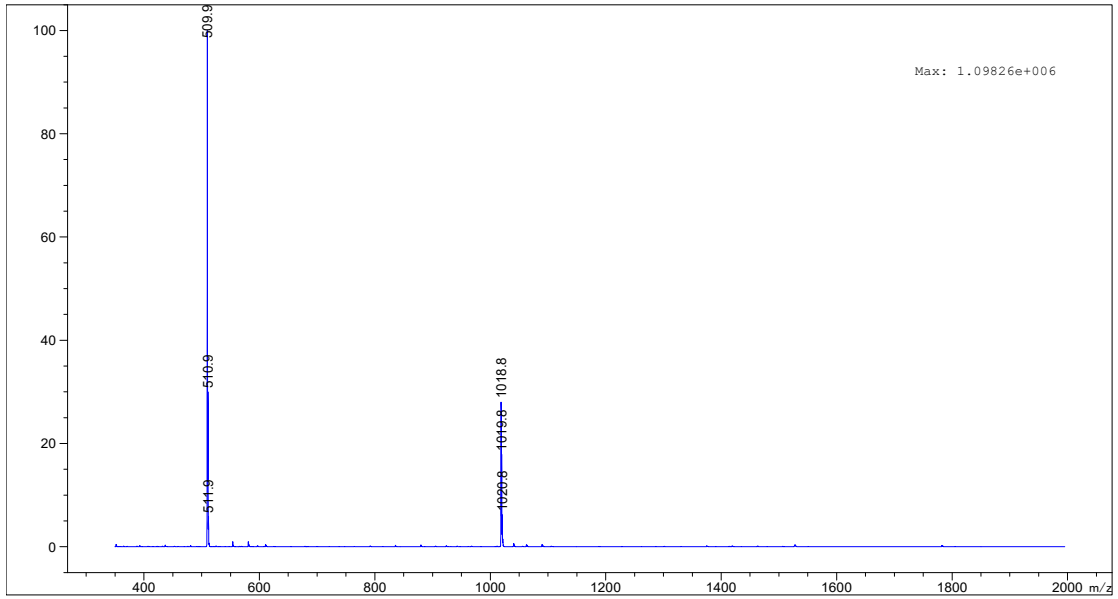

52. Compound TGFF: obsvd.  $[M+H]^+$  = 471.0

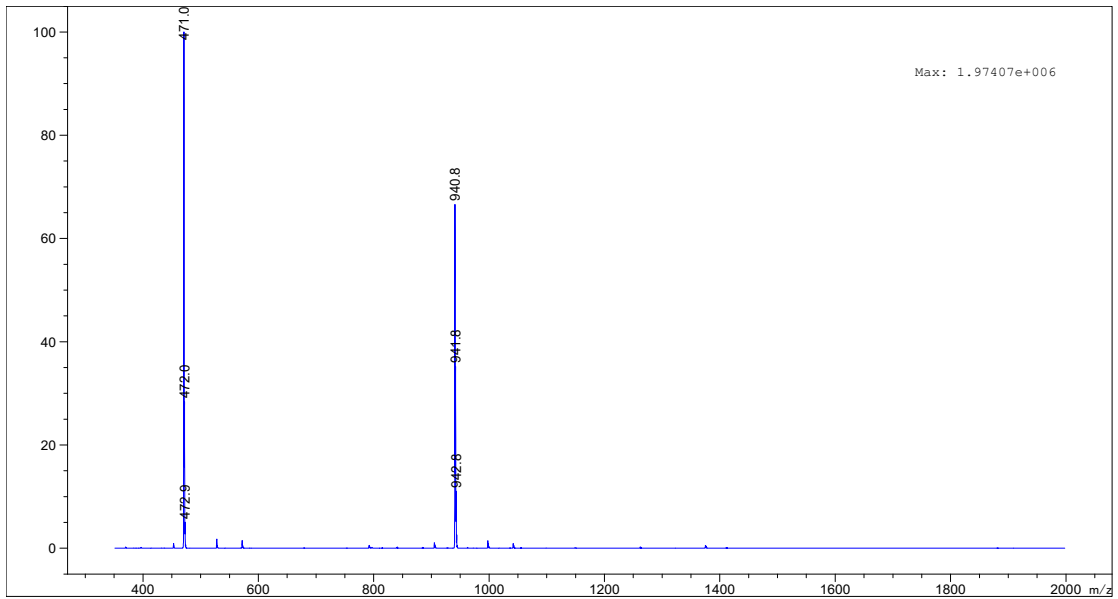

53. Compound VAFY: obsvd.  $[M+H]^+$  = 499.0

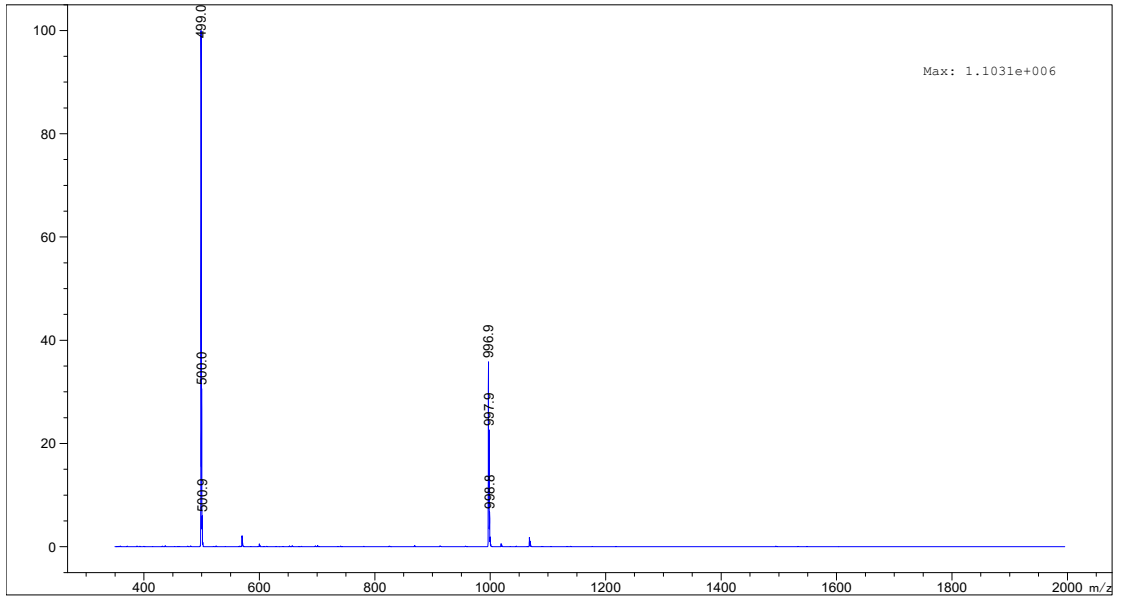

54. Compound **SSFF**: obsvd.  $[M+H]^+ = 487.0$

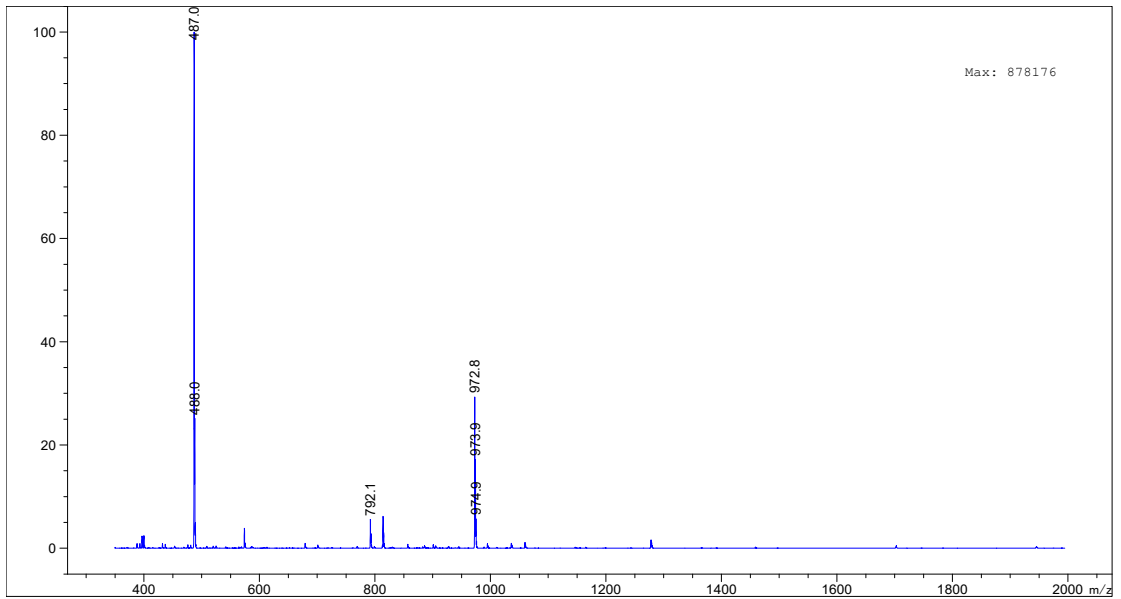

55. Compound **CTYF**: obsvd.  $[M+H]^+ = 532.9$

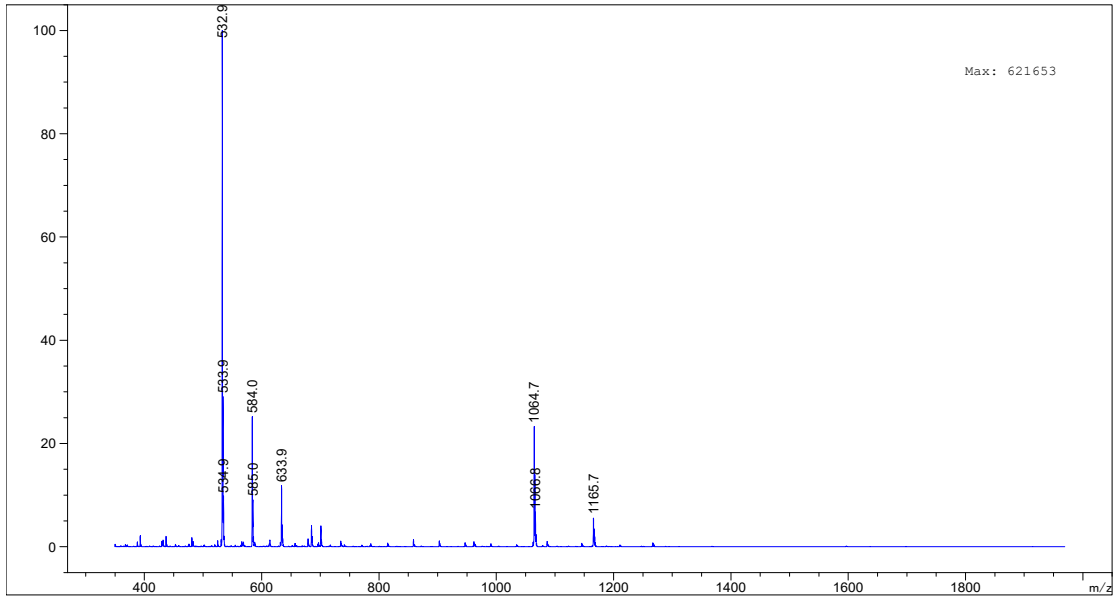

56. Compound **FSYV**: obsvd.  $[M+H^+] = 515.0$

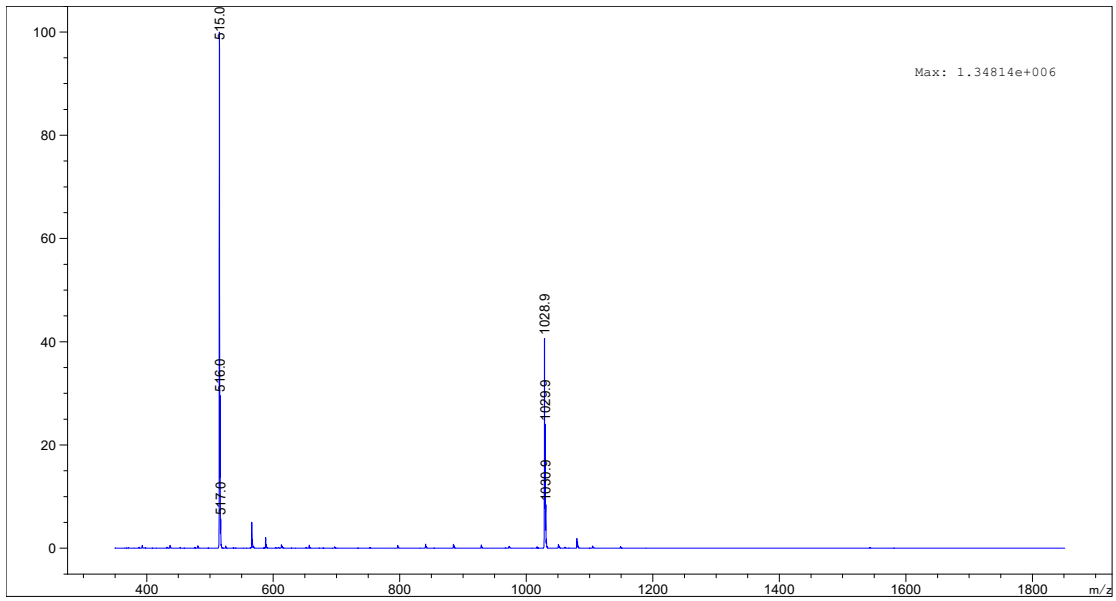

57. Compound **GVLFF**: obsvd.  $[M+H^+] = 435.1$

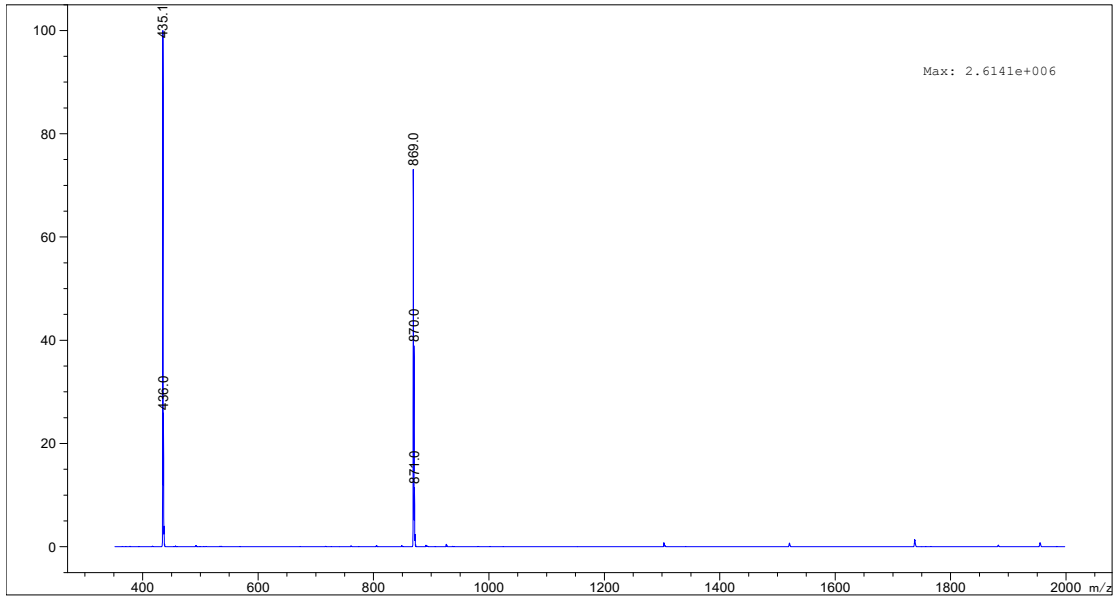

58. Compound **STYF**: obsvd.  $[M+ H^+] = 517.0$

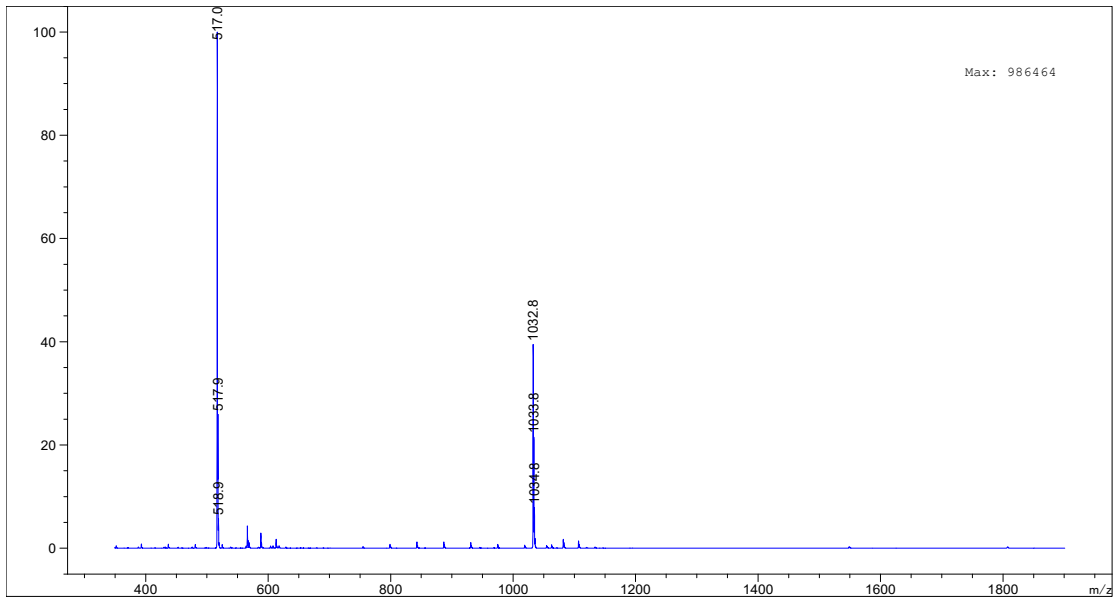

59. Compound **ILVV**: obsvd.  $[M+ H^+] = 442.6$

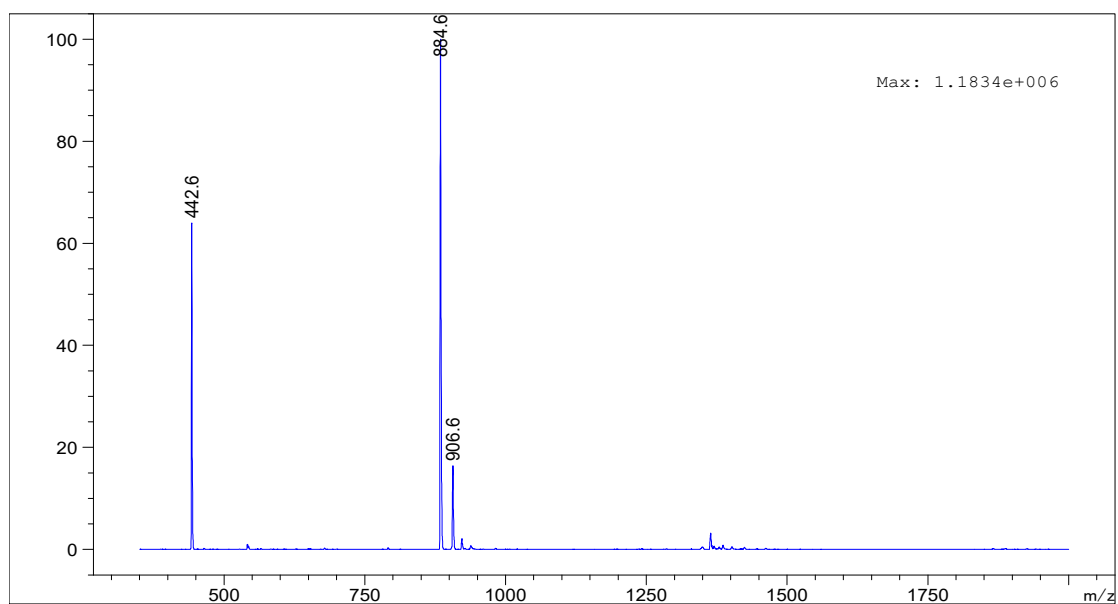

60. Compound **IVII**: obsvd.  $[M+H]^+ = 456.6$

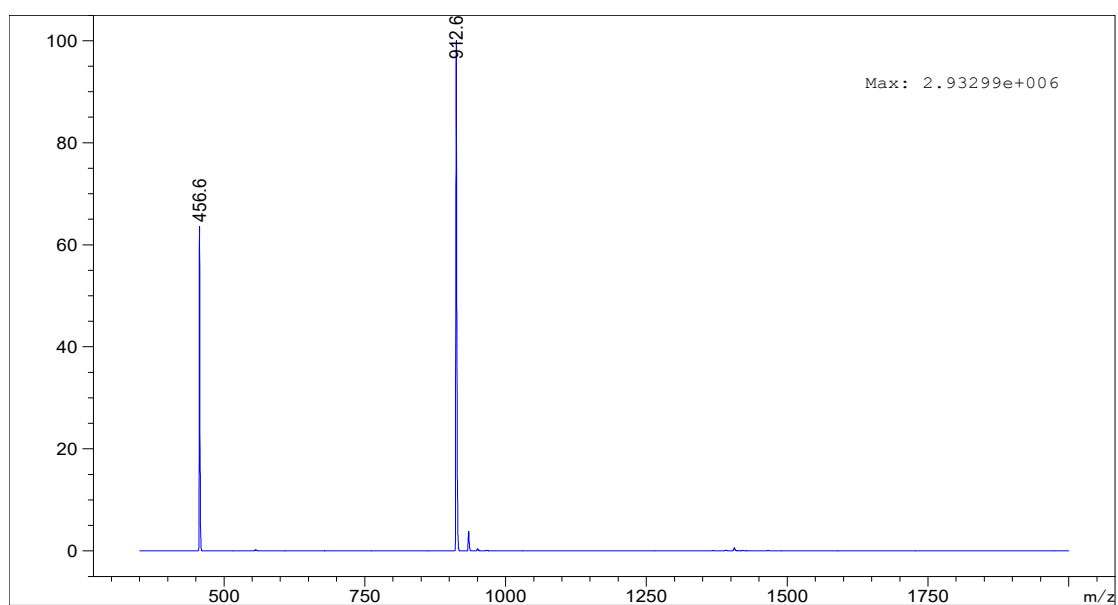

61. Compound **LVII**: obsvd.  $[M+H]^+ = 456.6$

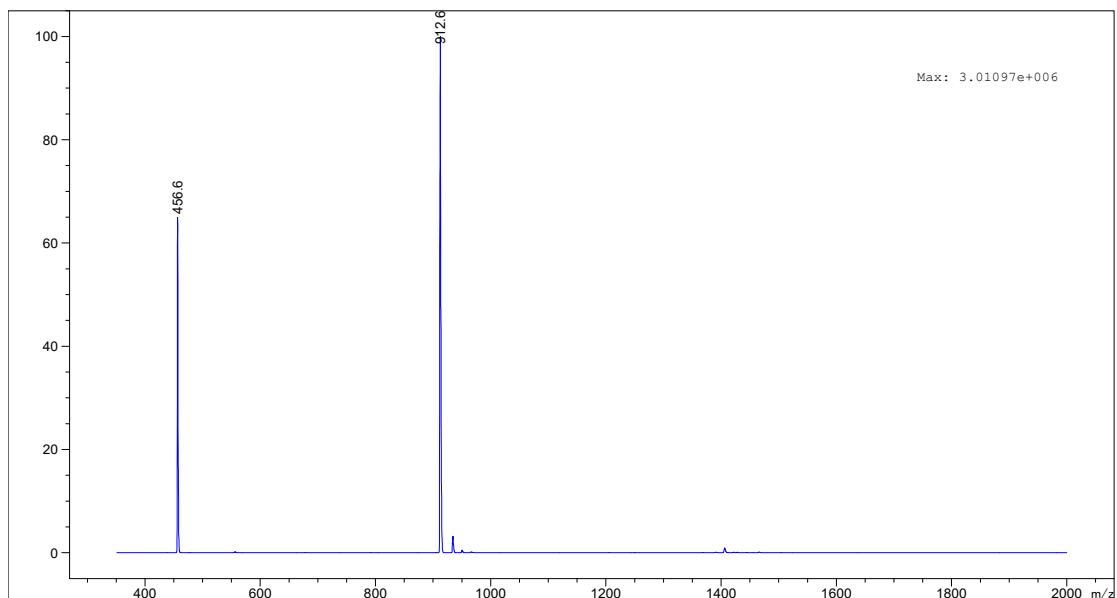

62. Compound LVLI: obsvd.  $[M+H^+] = 456.6$

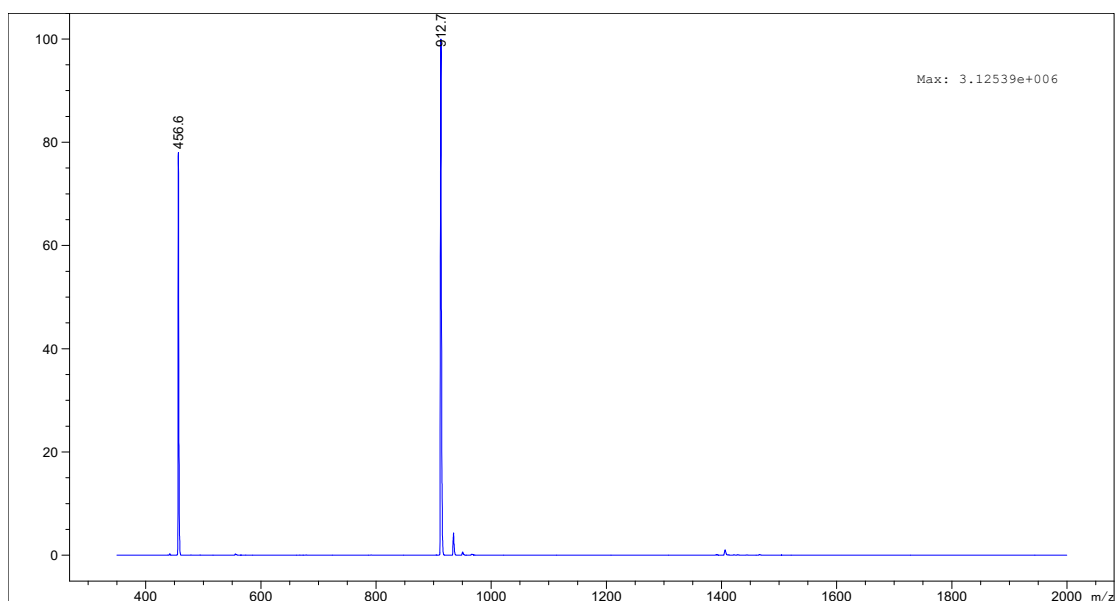

63. Compound SLVV: obsvd.  $[M+H^+] = 416.5$

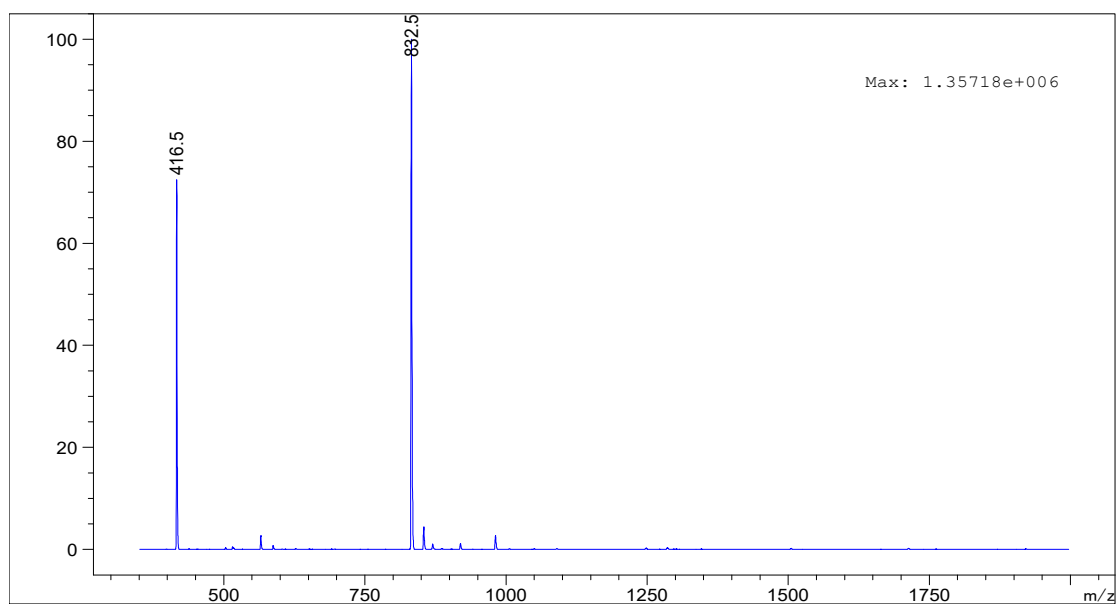

64. Compound VILI: obsvd.  $[M+H^+] = 456.5$

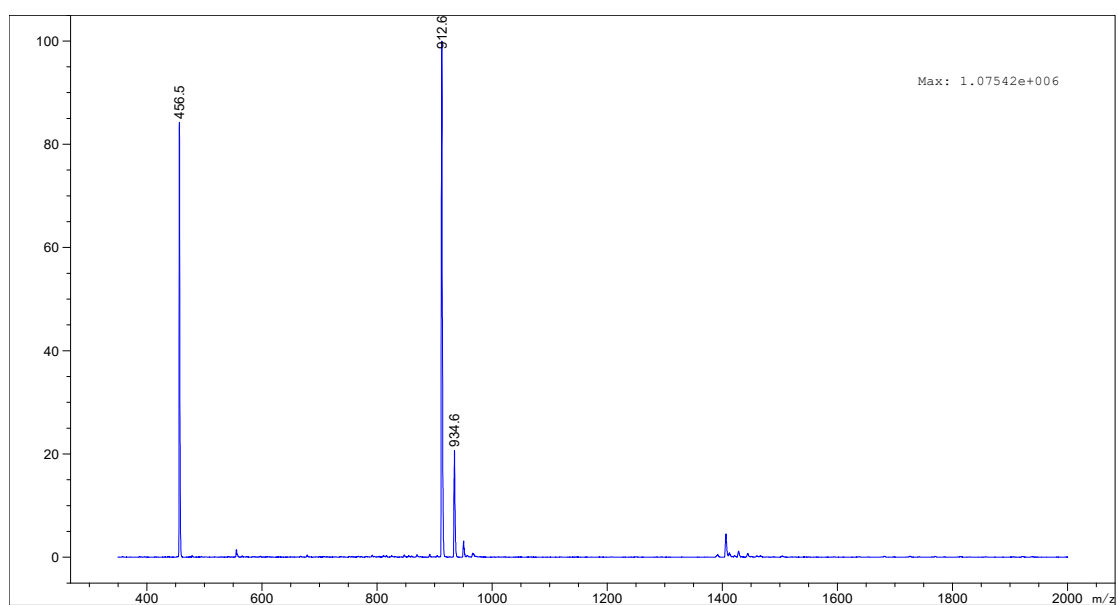

65. Compound VLVL: obsvd.  $[M+H^+] = 442.5$



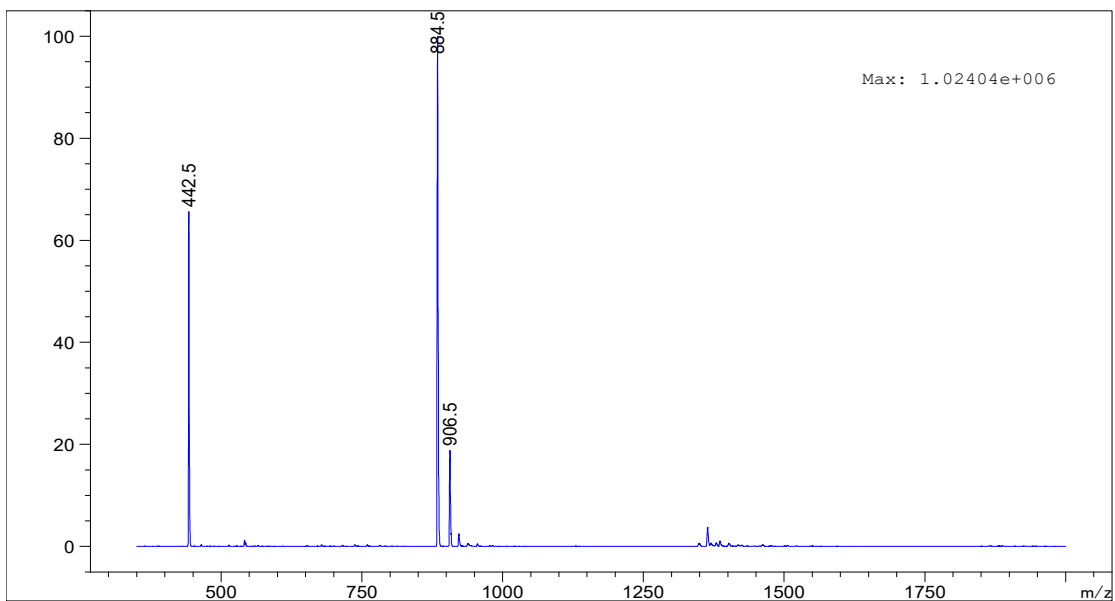

66. Compound **GVFY**: obsvd.  $[M+H^+] = 485.4$

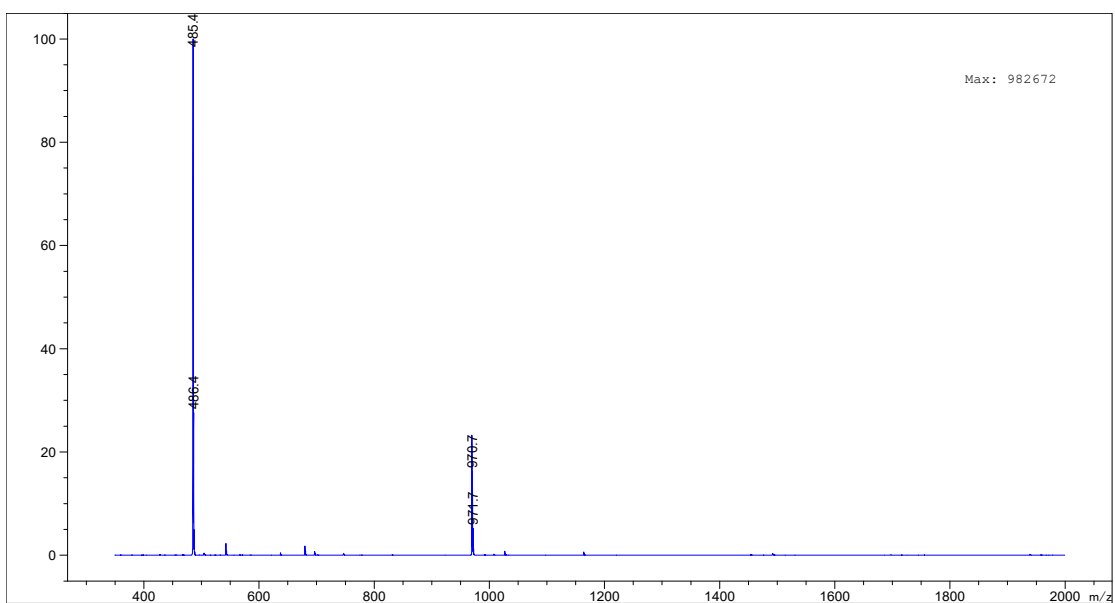

67. Compound **IMVV**: obsvd.  $[M+H^+] = 461.1$

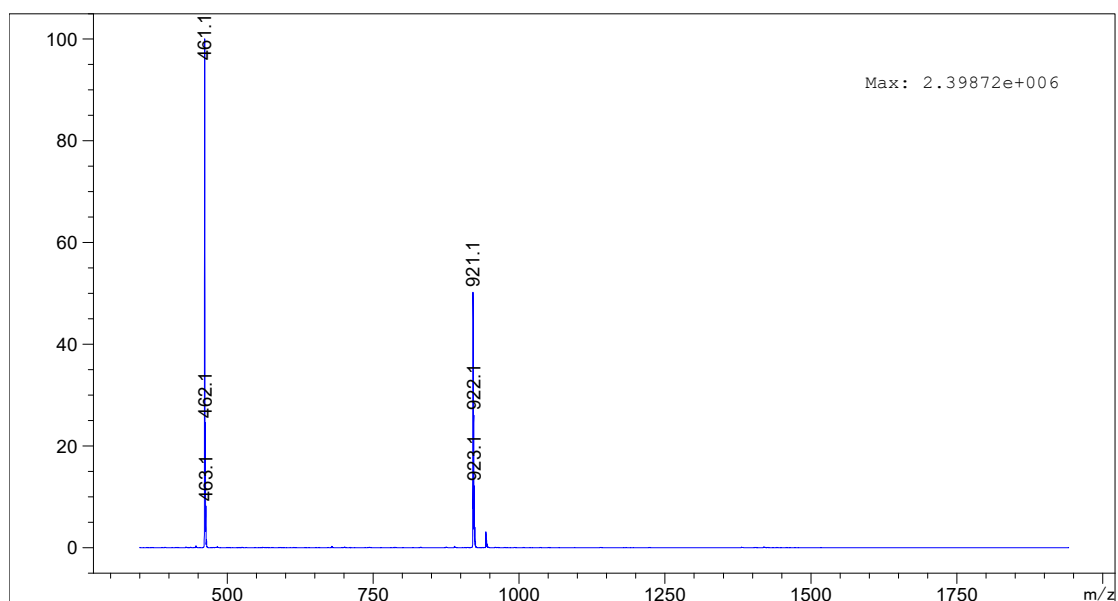

68. Compound **LTLF**: obsvd.  $[M+H^+] = 493.3$

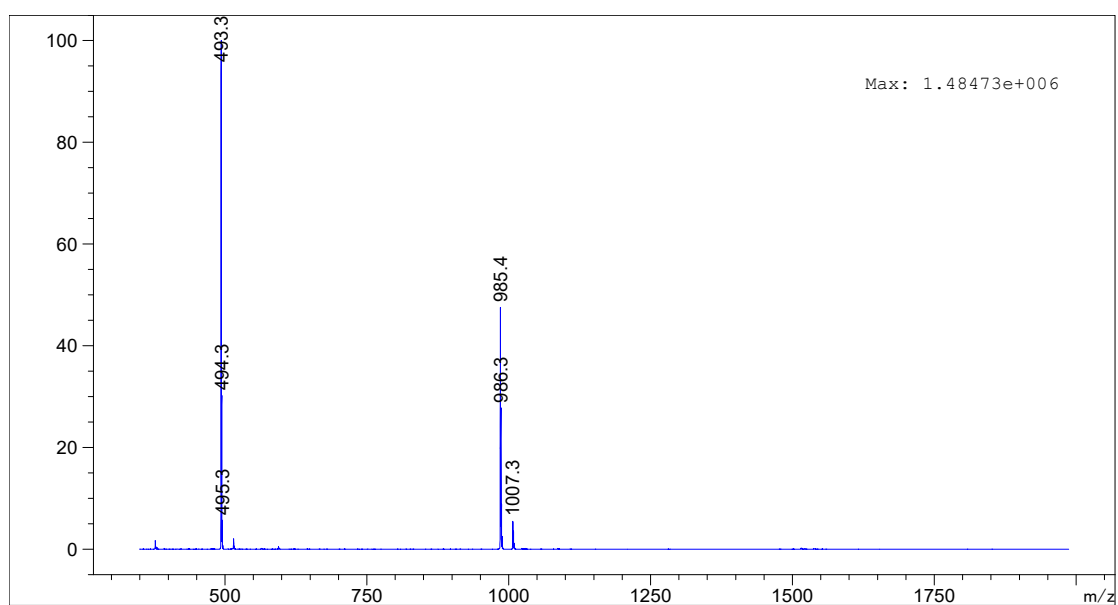

69. Compound **LTLI**: obsvd.  $[M+H^+] = 459.3$

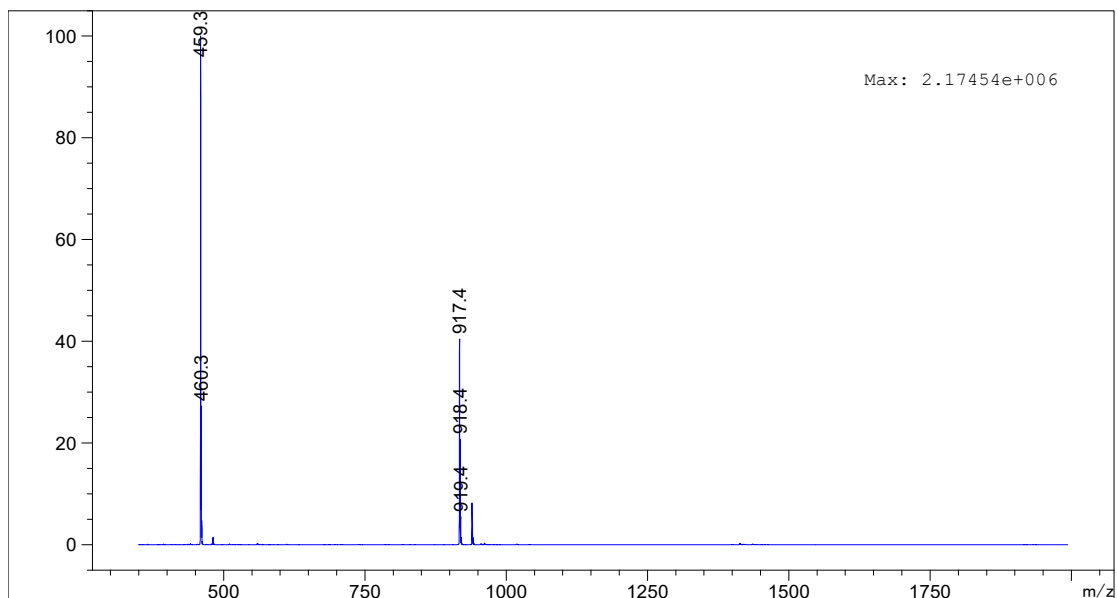

70. Compound LWFF: obsvd.  $[M+H^+] = 611.9$

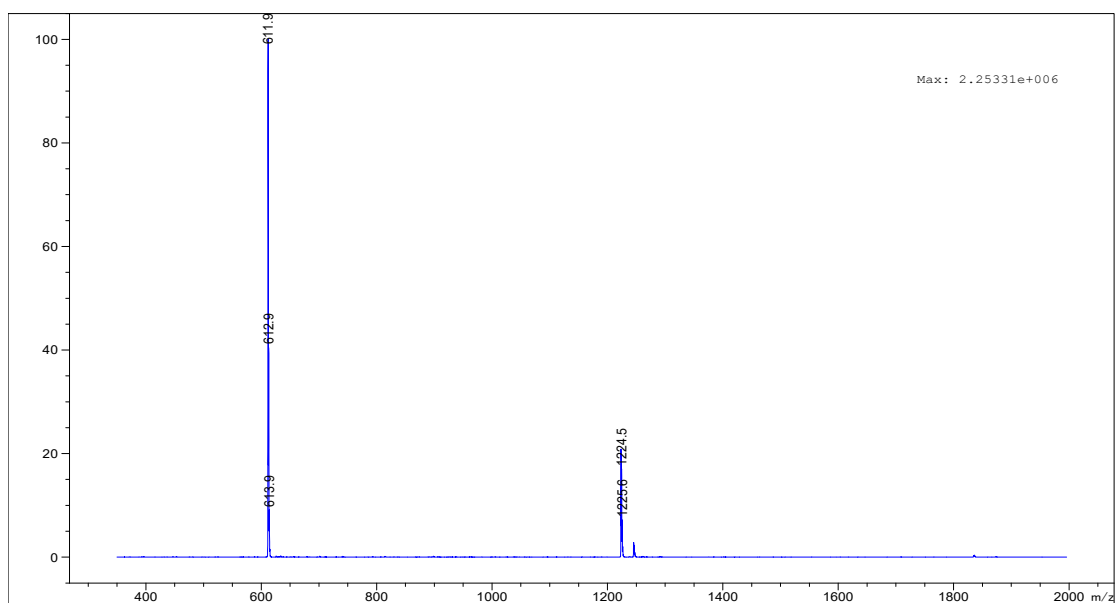

71. Compound IQII: obsvd.  $[M+H^+] = 486.2$

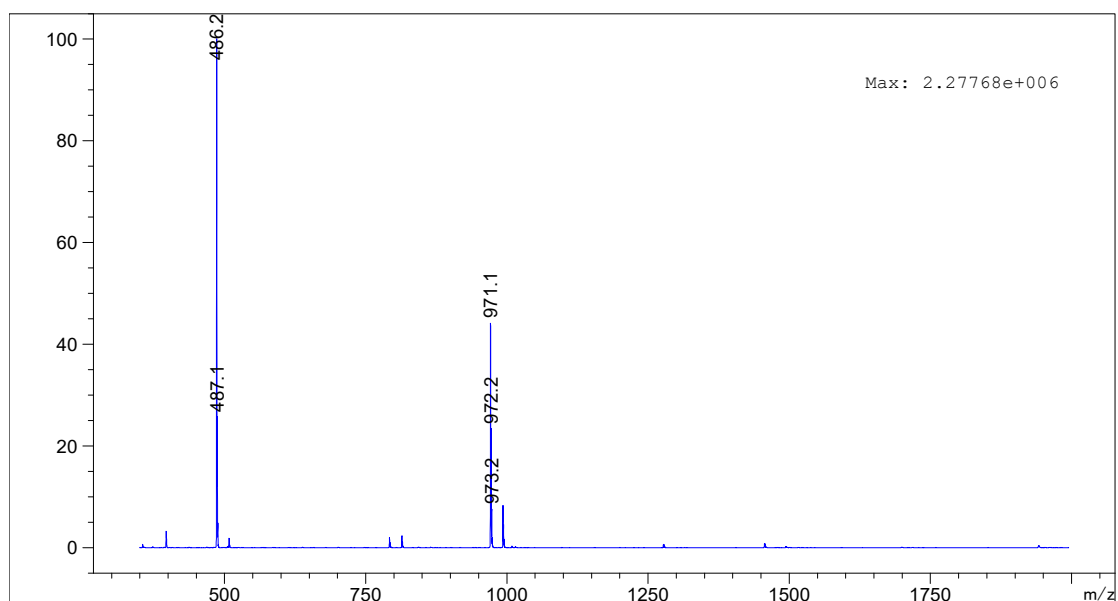

72. Compound LVIF: obsvd.  $[M+H^+] = 491.3$

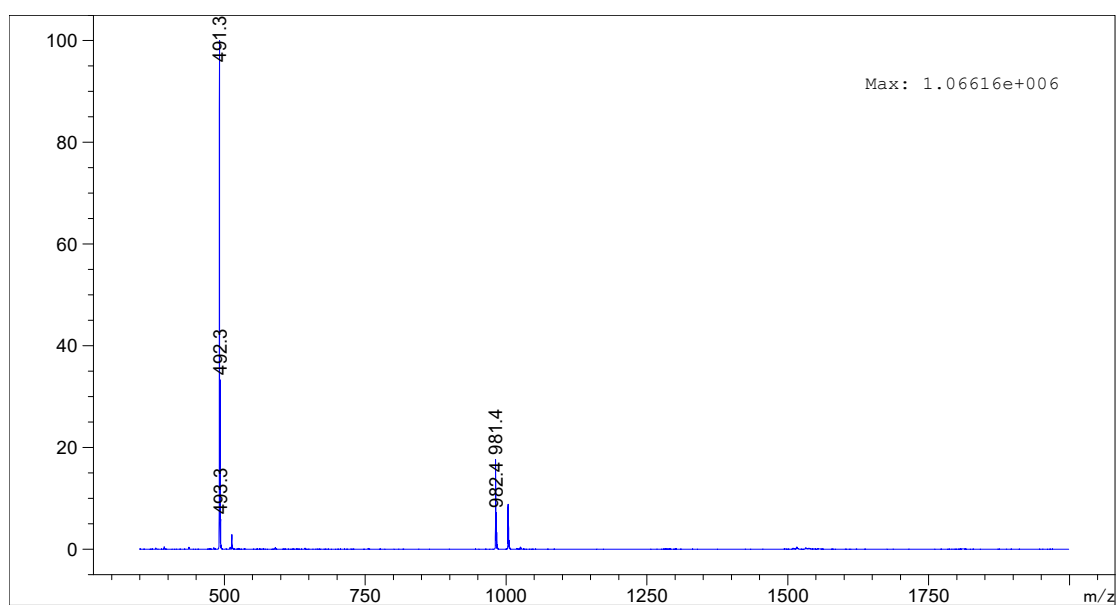

73. Compound LVWF: obsvd.  $[M+H^+] = 564.3$

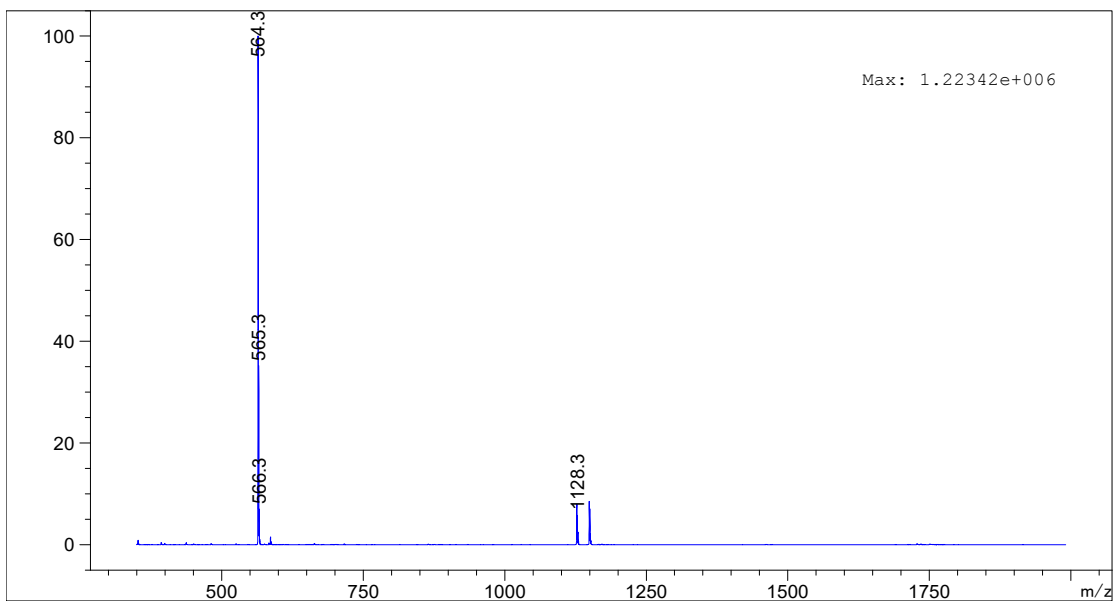

74. Compound **WVII**: obsvd.  $[M+H]^+ = 530.3$

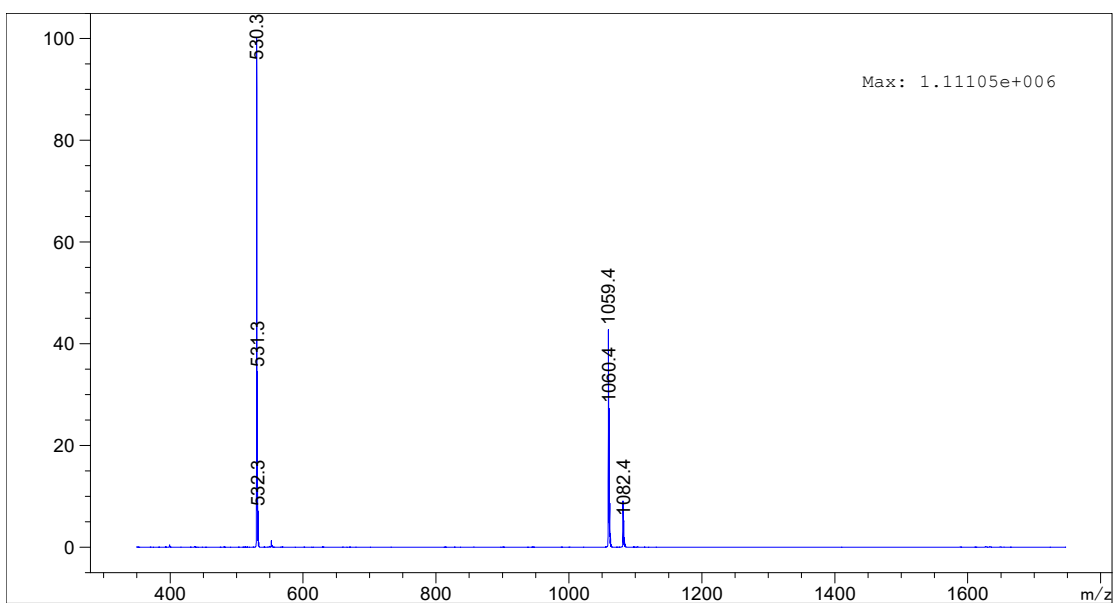

75. Compound **LVIIY**: obsvd.  $[M+H]^+ = 507.3$

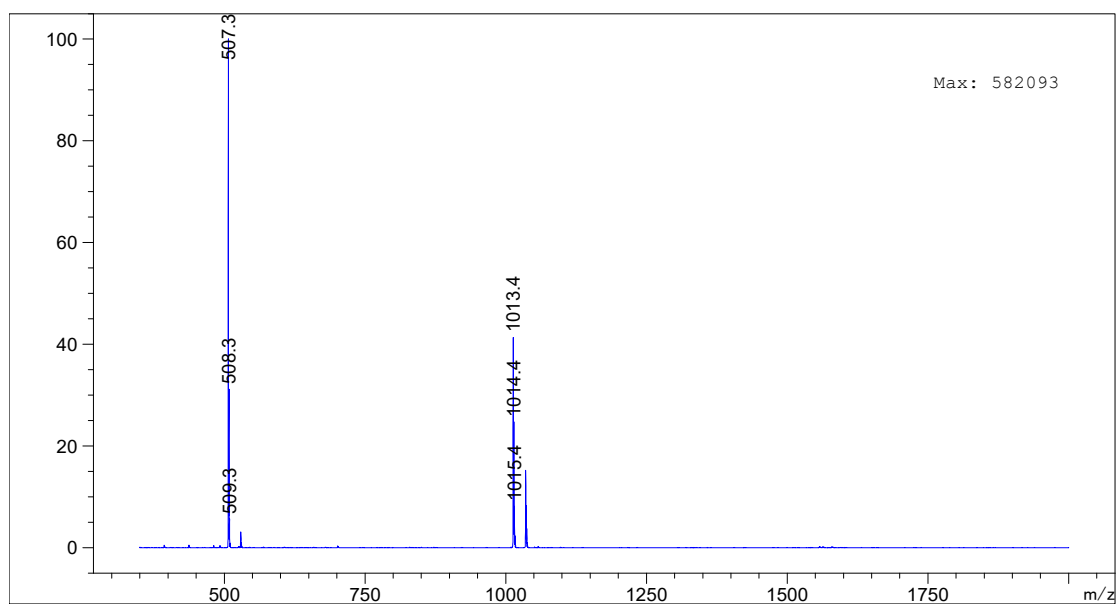

76. Compound **QMVV**: obsvd.  $[M+H]^+$  = 476.0

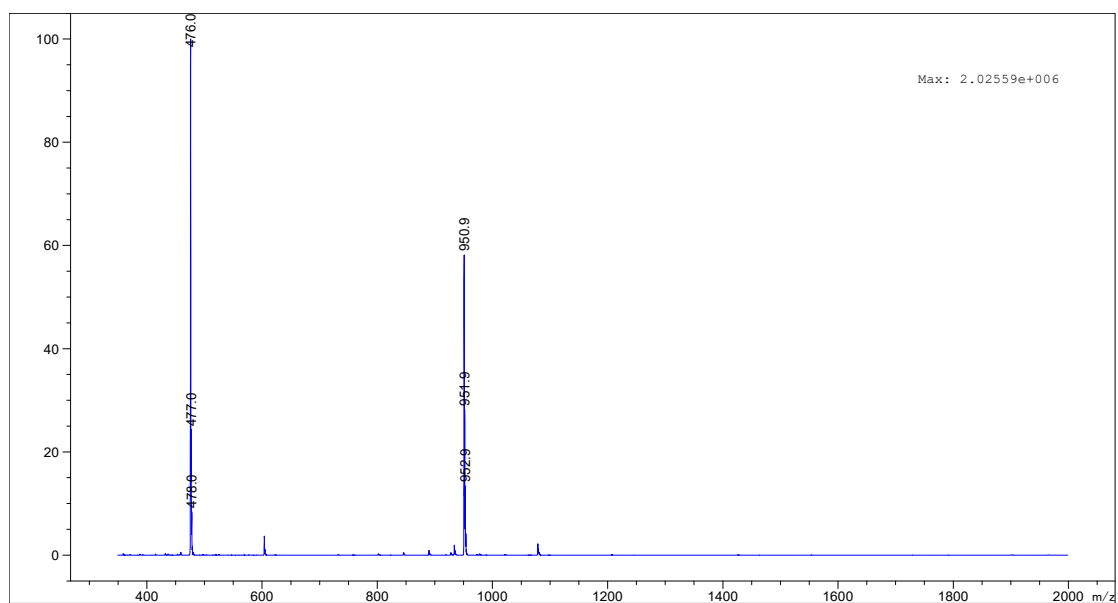

77. Compound **WTIF**: obsvd.  $[M+H]^+$  = 566.0

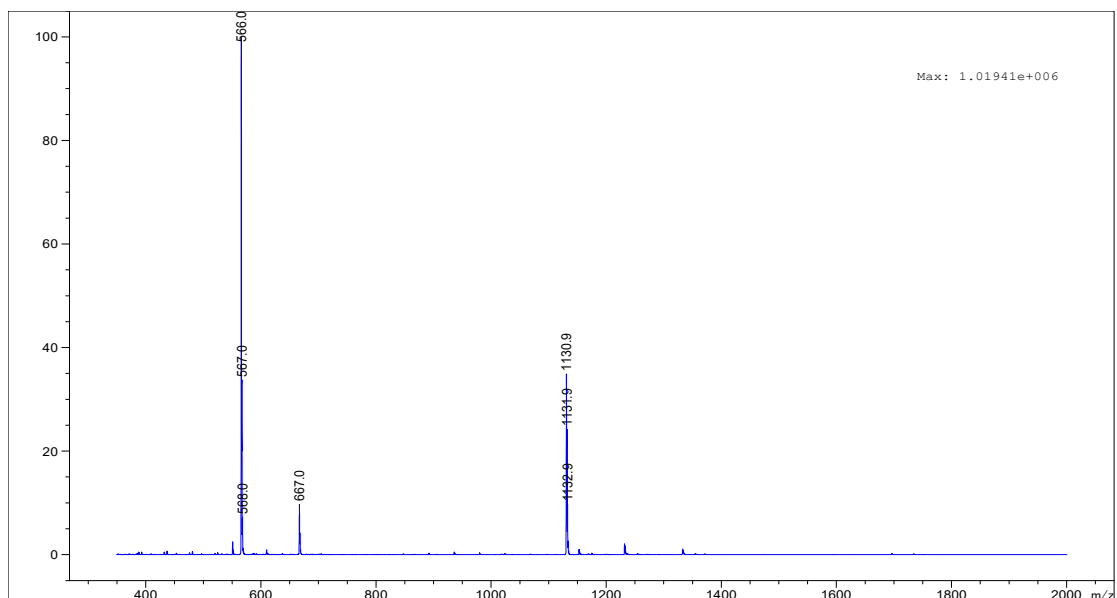

78. Compound **IVIY**: obsvd.  $[M+H^+] = 507.0$

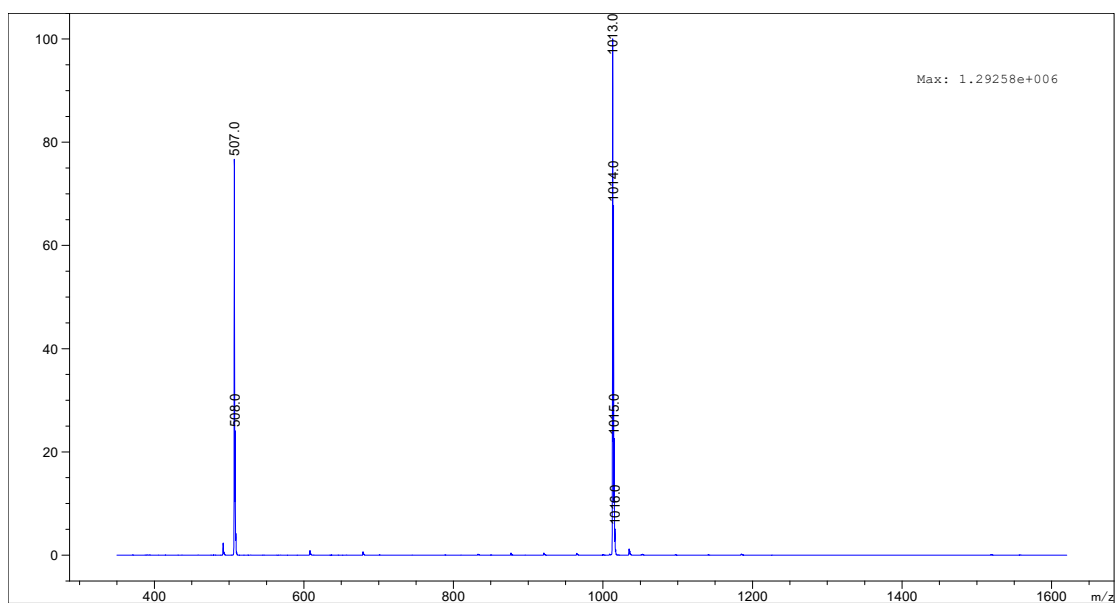

79. Compound **NTIF**: obsvd.  $[M+H^+] = 494.0$

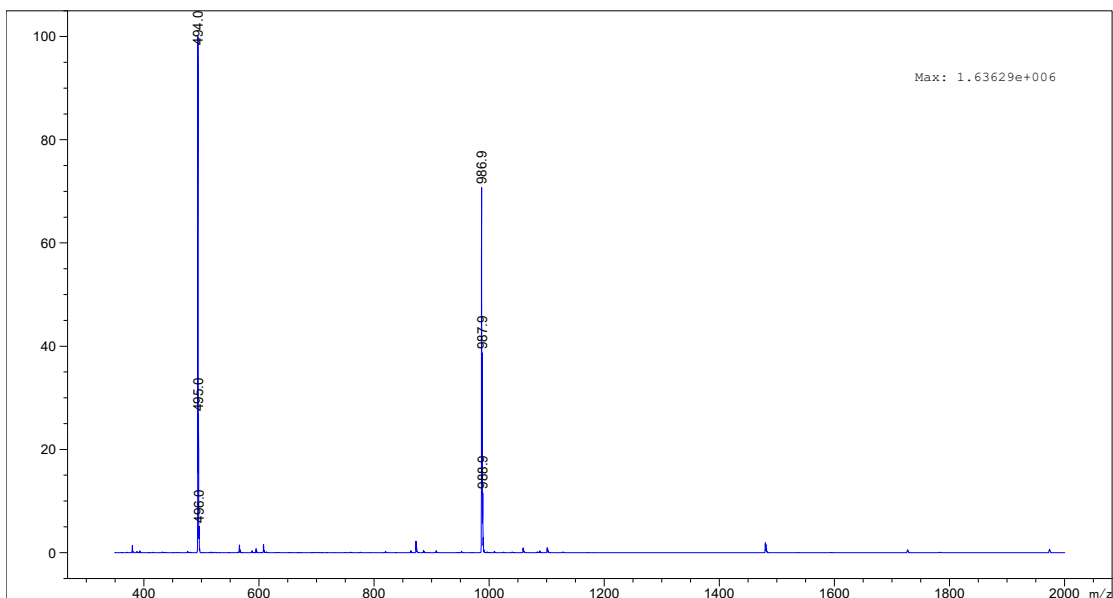

80. Compound FVIY: obsvd.  $[M+H^+] = 541.0$

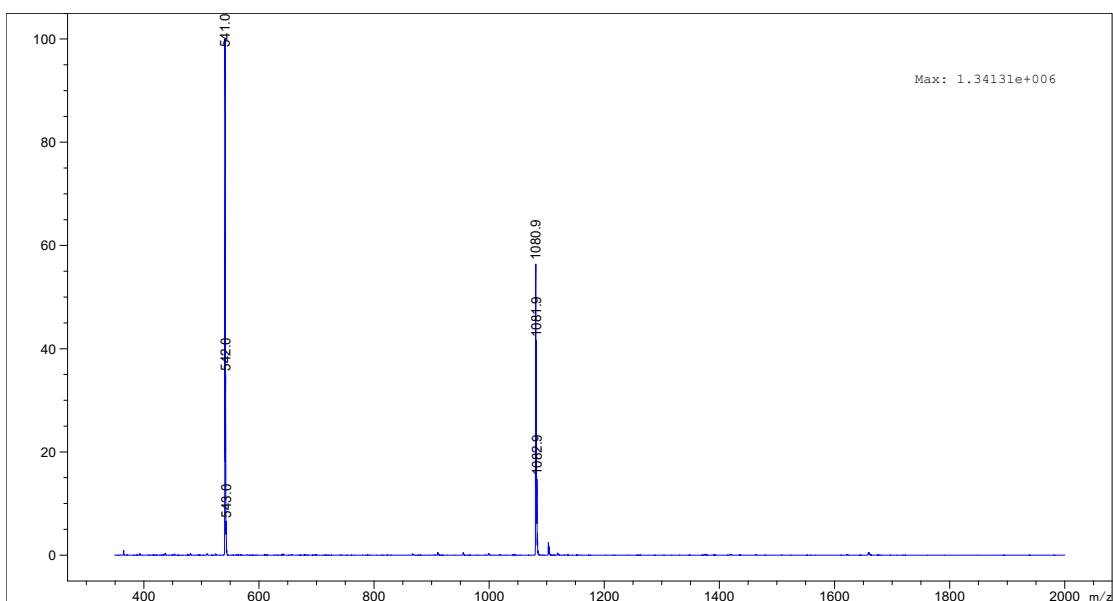

81. Compound LLLF: obsvd.  $[M+H^+] = 505.0$



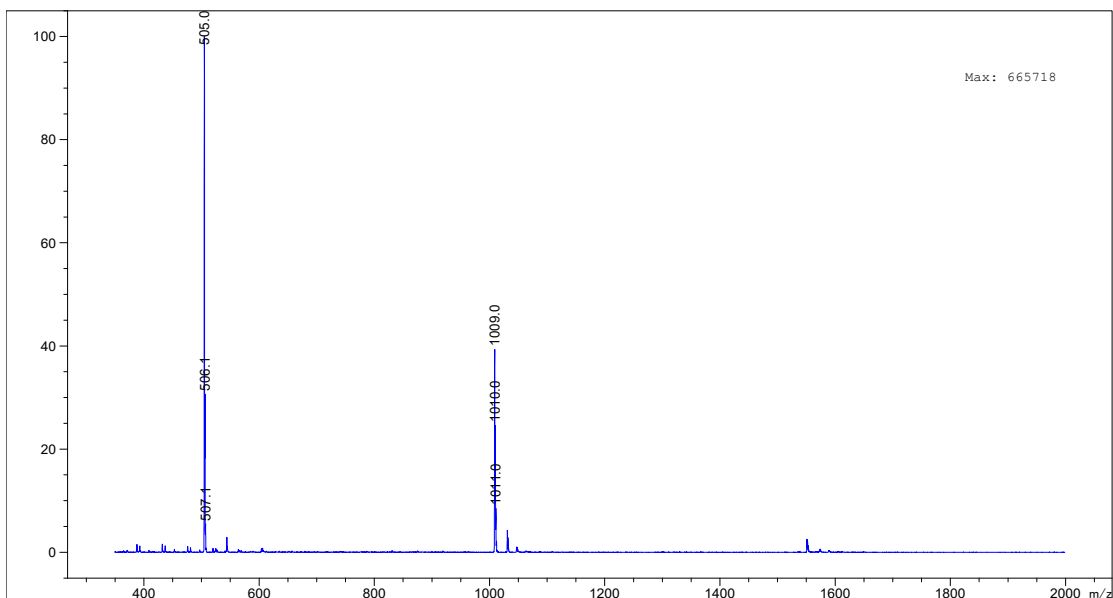

82. Compound LVHF: obsvd.  $[M+H^+] = 515.0$

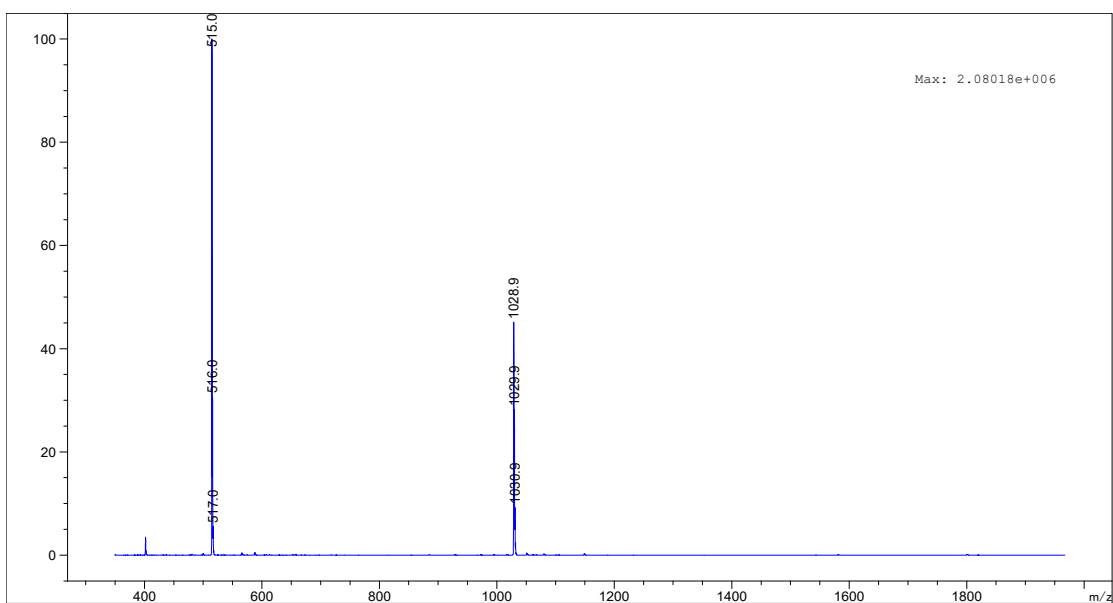

83. Compound PIFY: obsvd.  $[M+H^+] = 539.0$

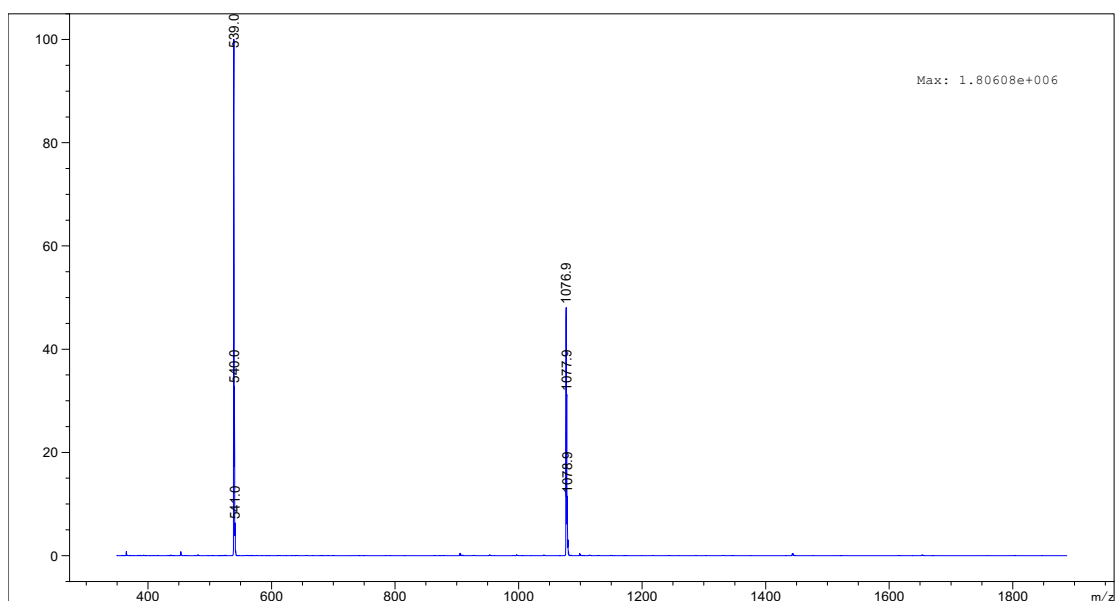

84. Compound **WIIF**: obsvd.  $[M+H^+] = 578.0$

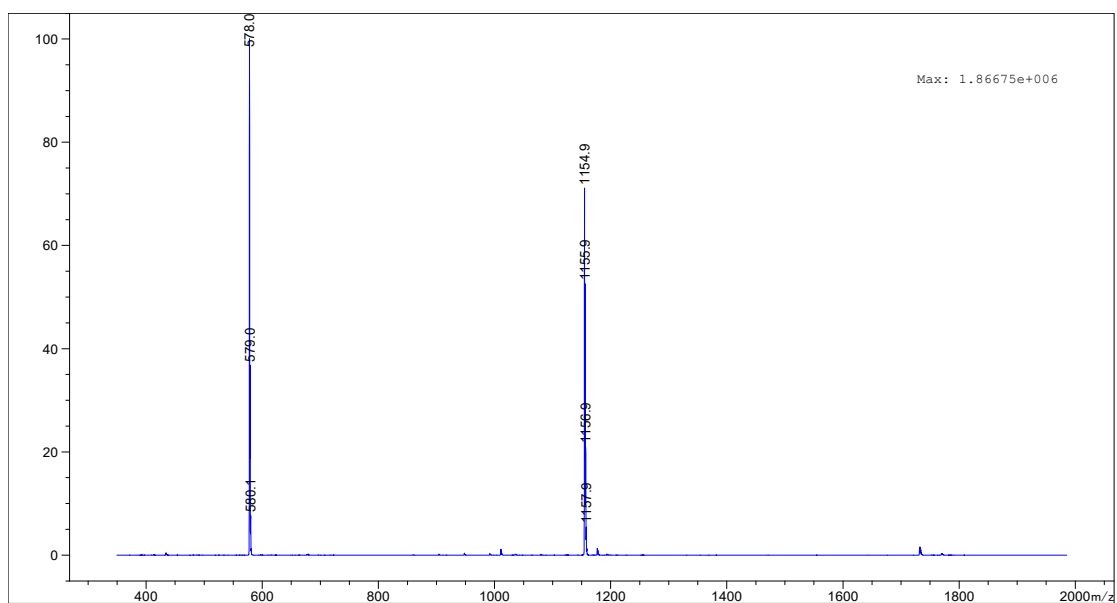

85. Compound **IFIY**: obsvd.  $[M+H^+] = 555.0$

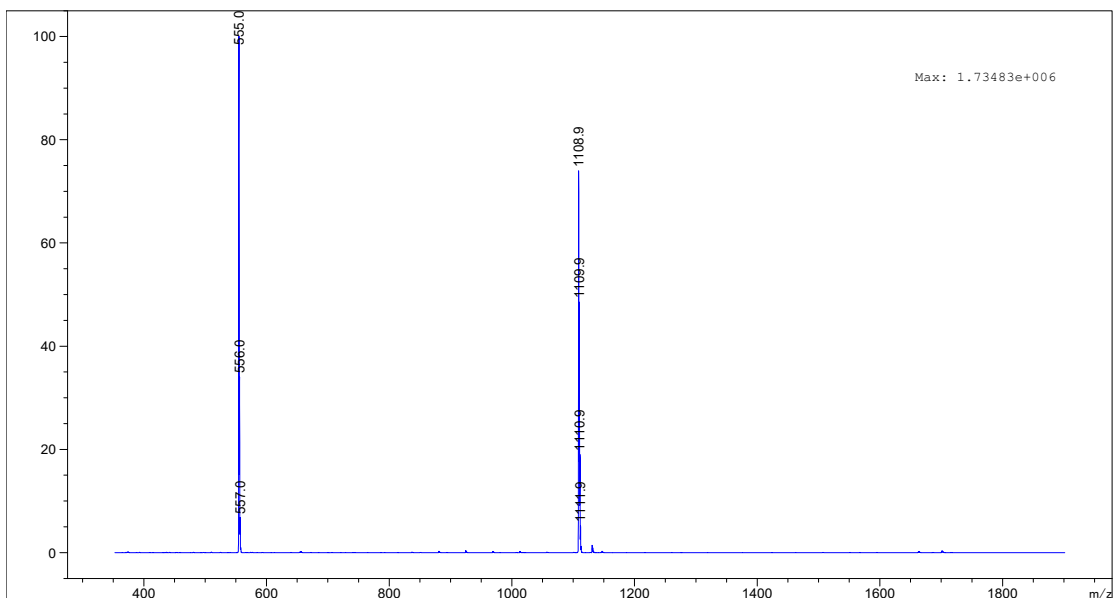

86. Compound IVFW: obsvd.  $[M+H]^+ = 564.0$

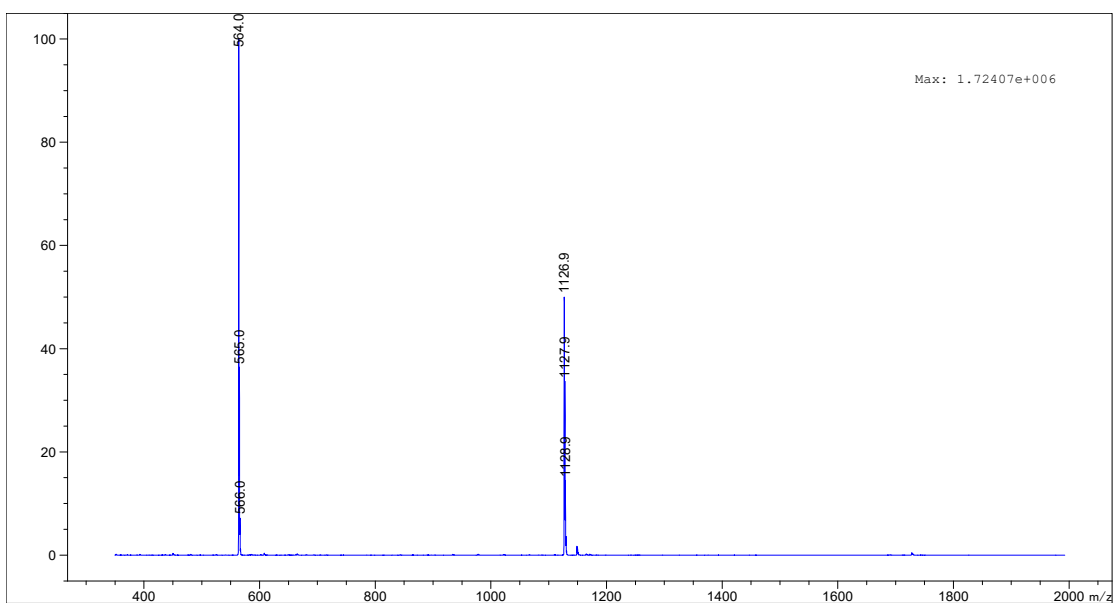

87. Compound VLVV: obsvd.  $[M+H]^+ = 428.6$

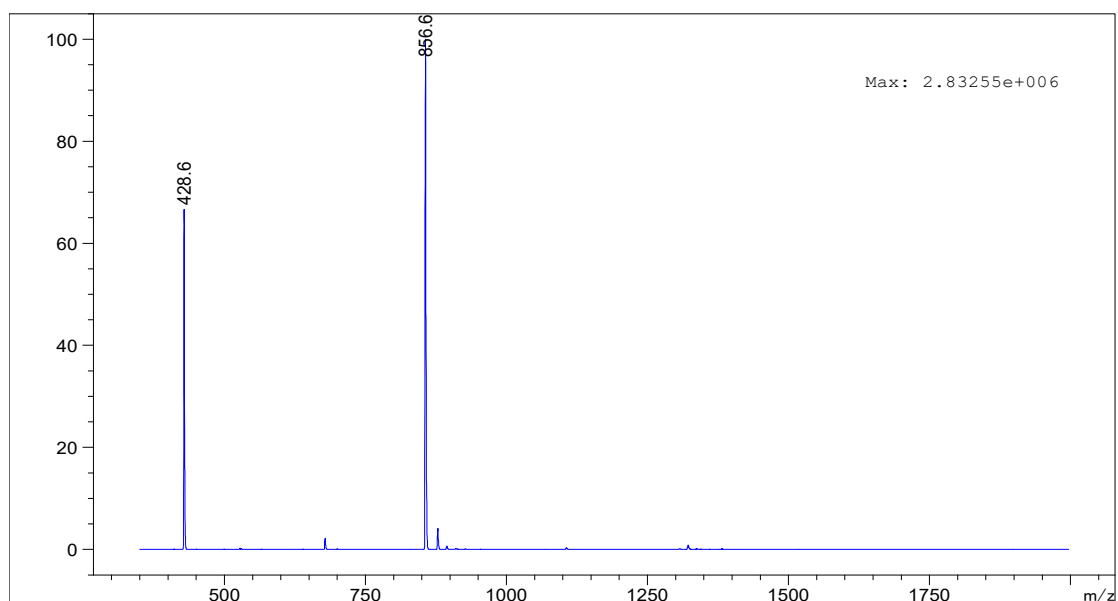

88. Compound HLLF: obsvd.  $[M+H^+] = 529.3$

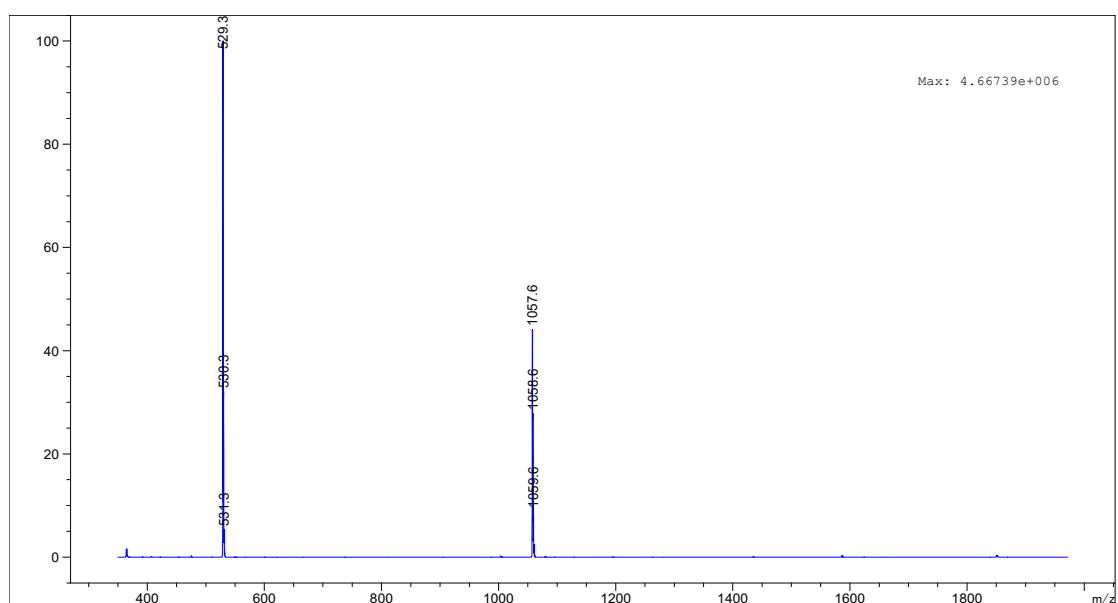

89. Compound IVIF: obsvd.  $[M+H^+] = 491.4$

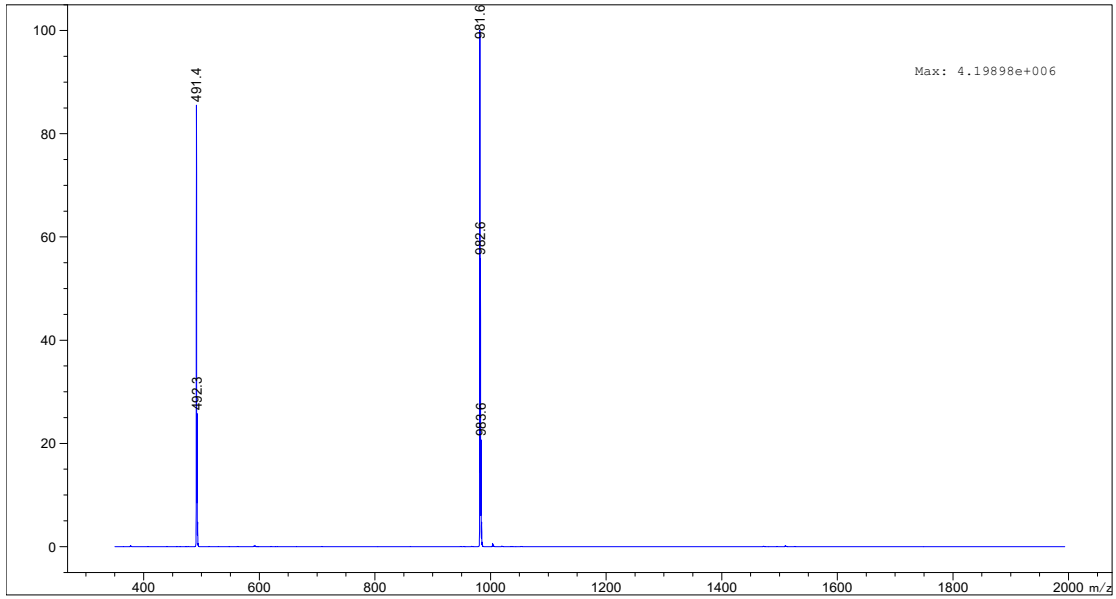

90. Compound **LLHF**: obsvd.  $[M+H^+] = 529.3$

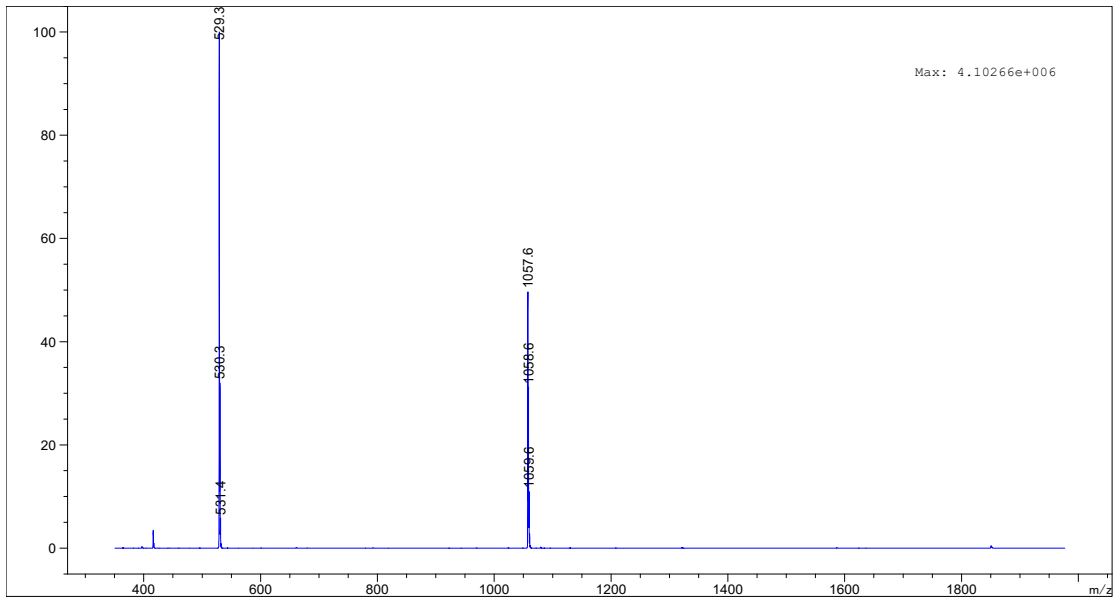

91. Compound **LLLY**: obsvd.  $[M+H^+] = 521.4$

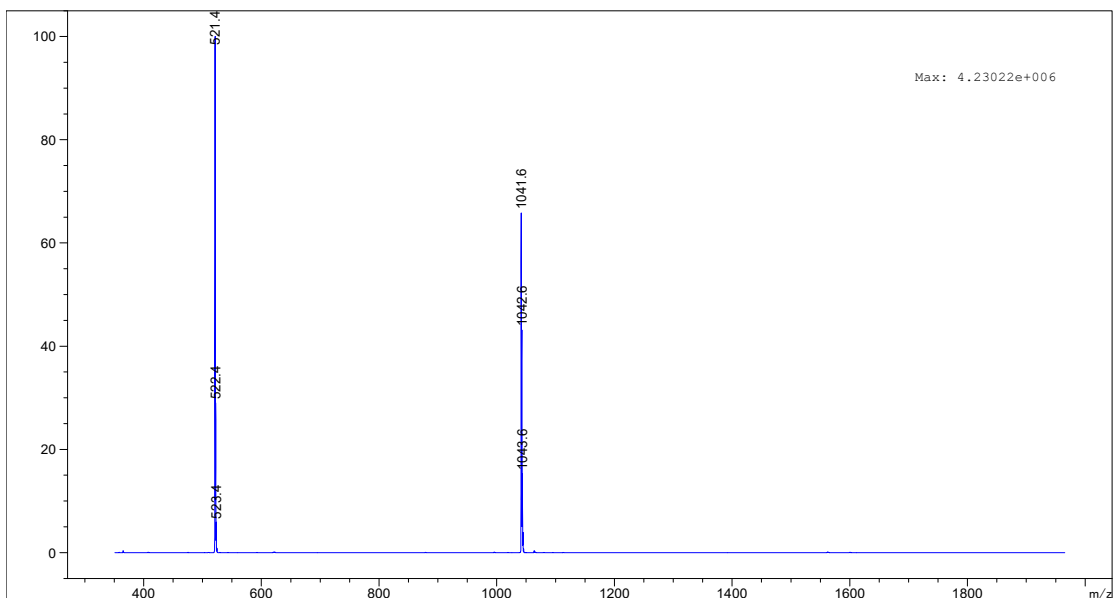

92. Compound **CIYF**: obsvd.  $[M+H^+] = 545.3$

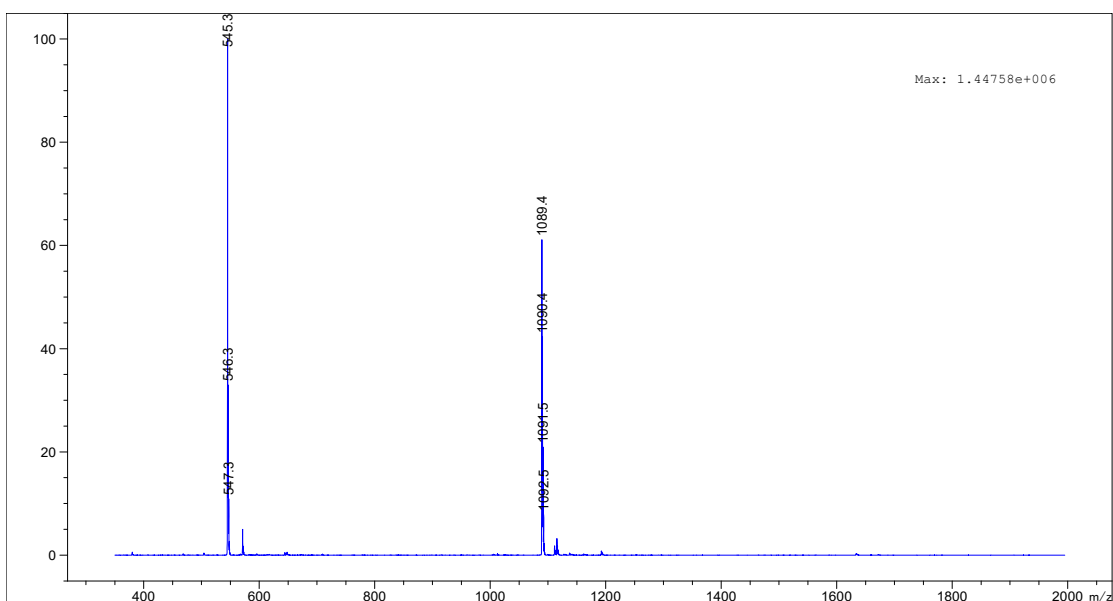

93. Compound **PVFW**: obsvd.  $[M+H^+] = 548.3$

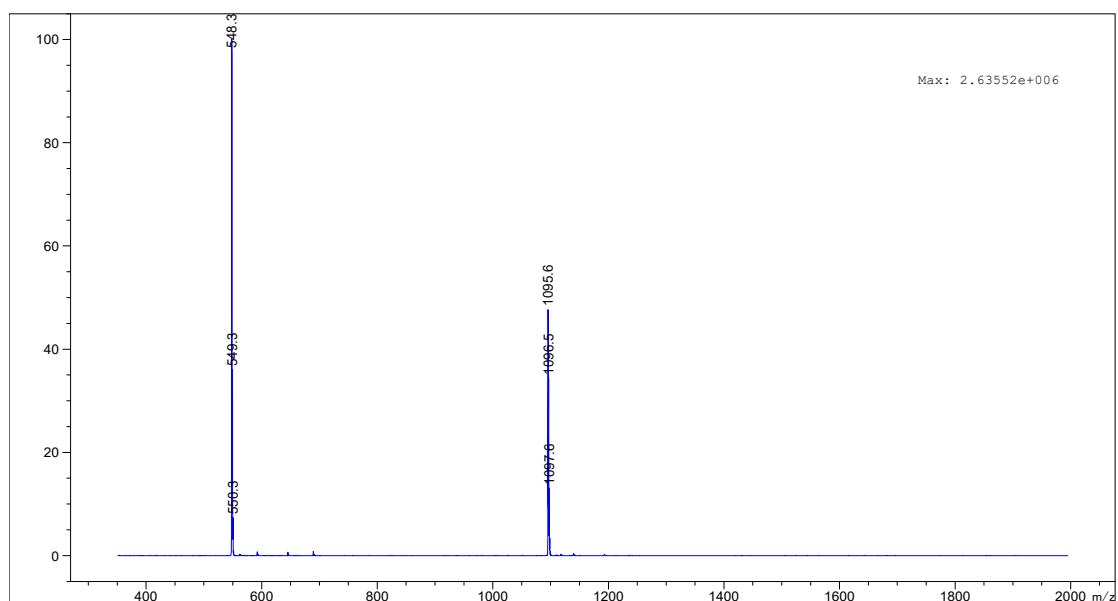

94. Compound PVII: obsvd.  $[M+H^+] = 441.3$

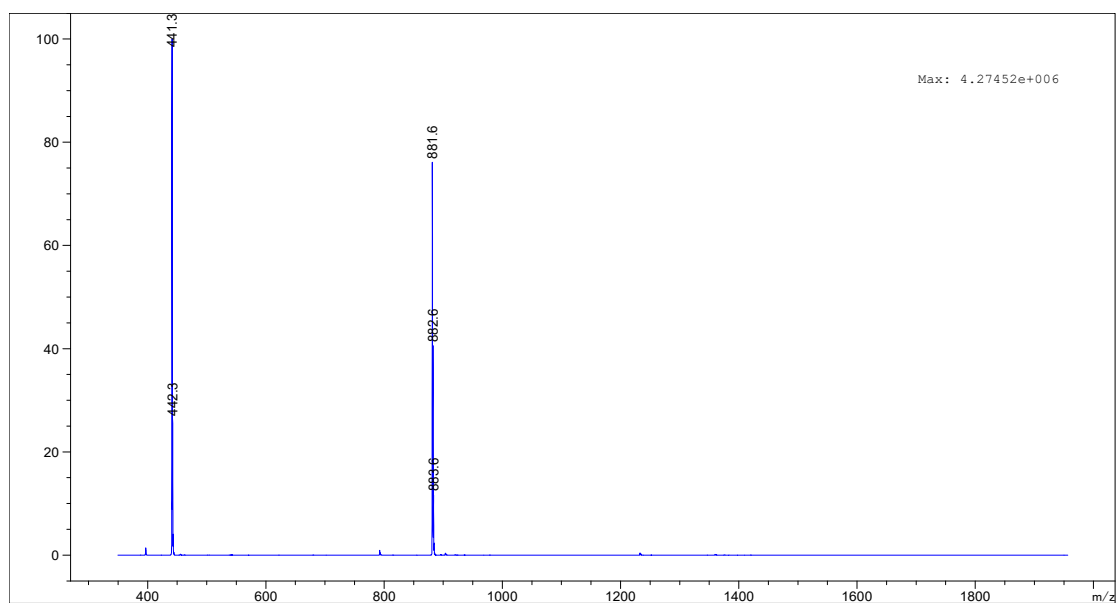

95. Compound PWYY: obsvd.  $[M+H^+] = 628.4$

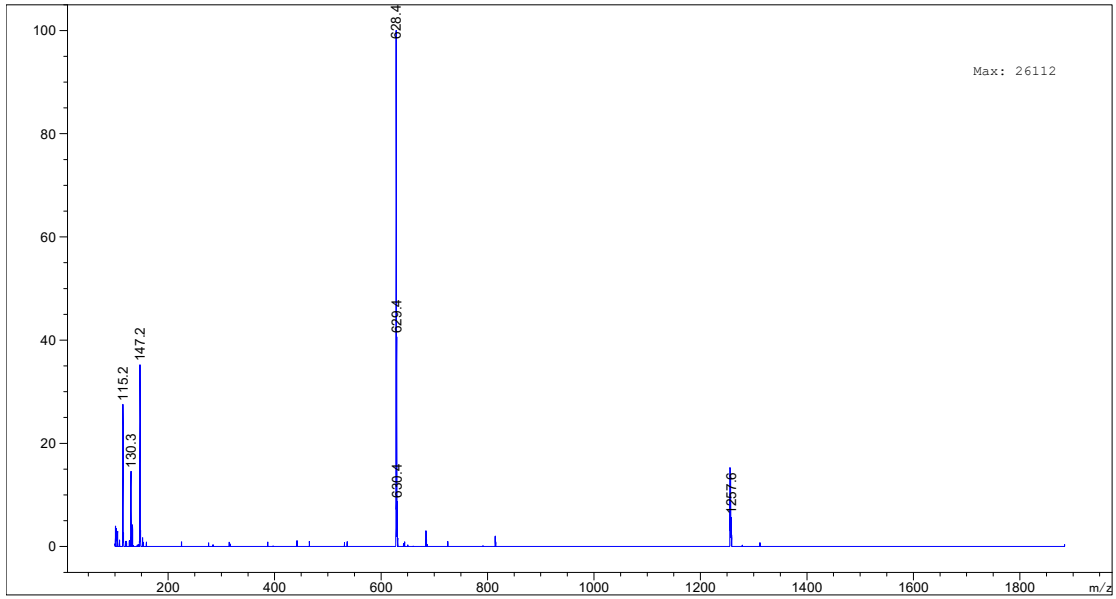

96. Compound **WAFY**: obsvd.  $[M+H^+] = 586.5$

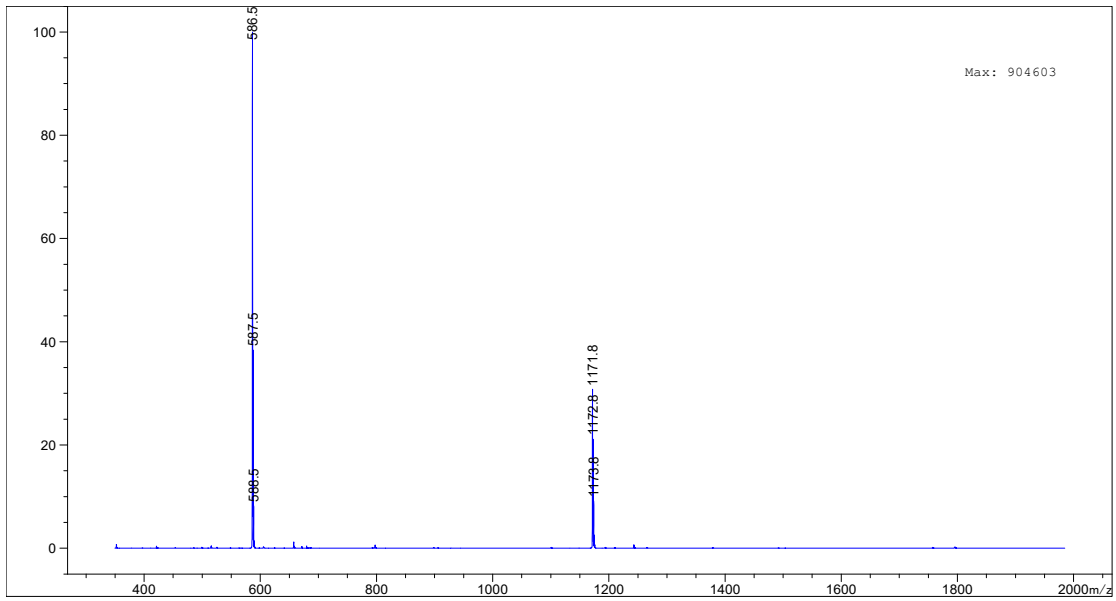

97. Compound **FHLF**: obsvd.  $[M+H^+] = 563.1$



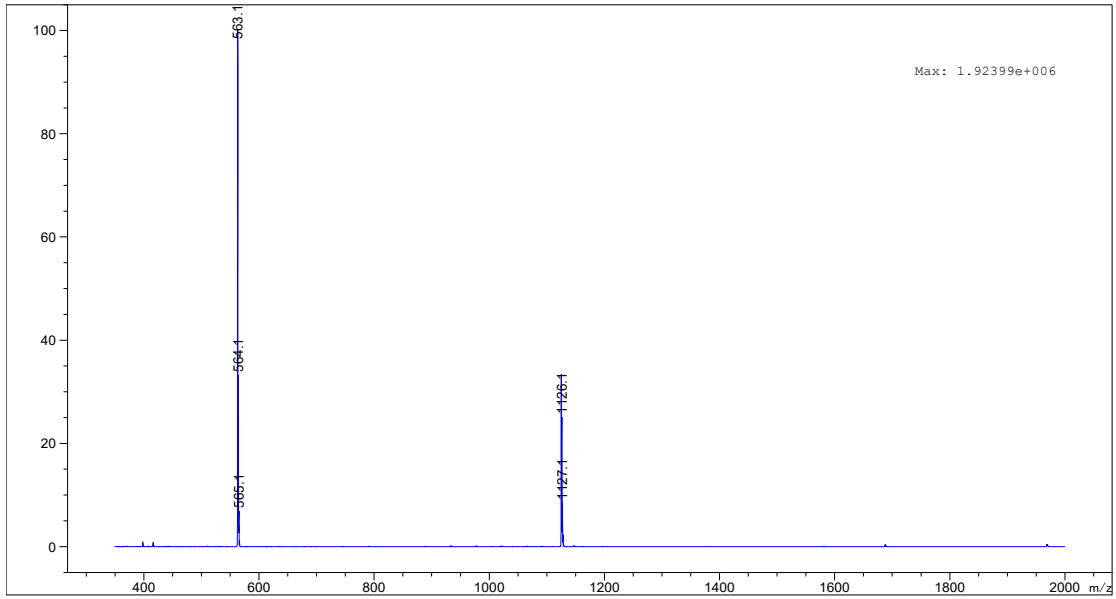

98. Compound **LIEM**: obsvd.  $[M+H^+] = 505.0$

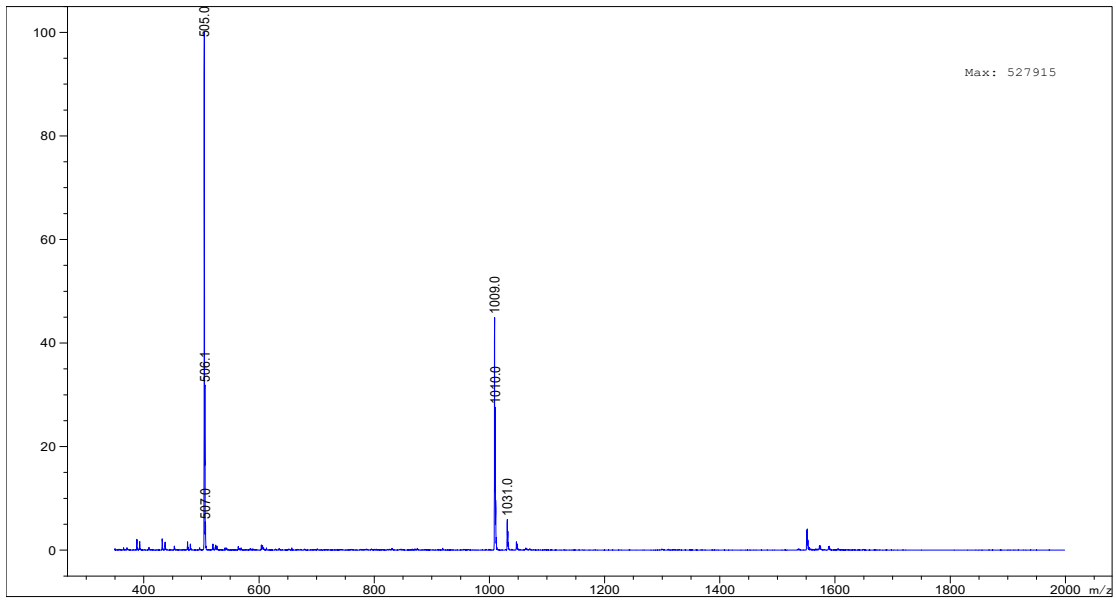

99. Compound **PMFY**: obsvd.  $[M+H^+] = 557.3$

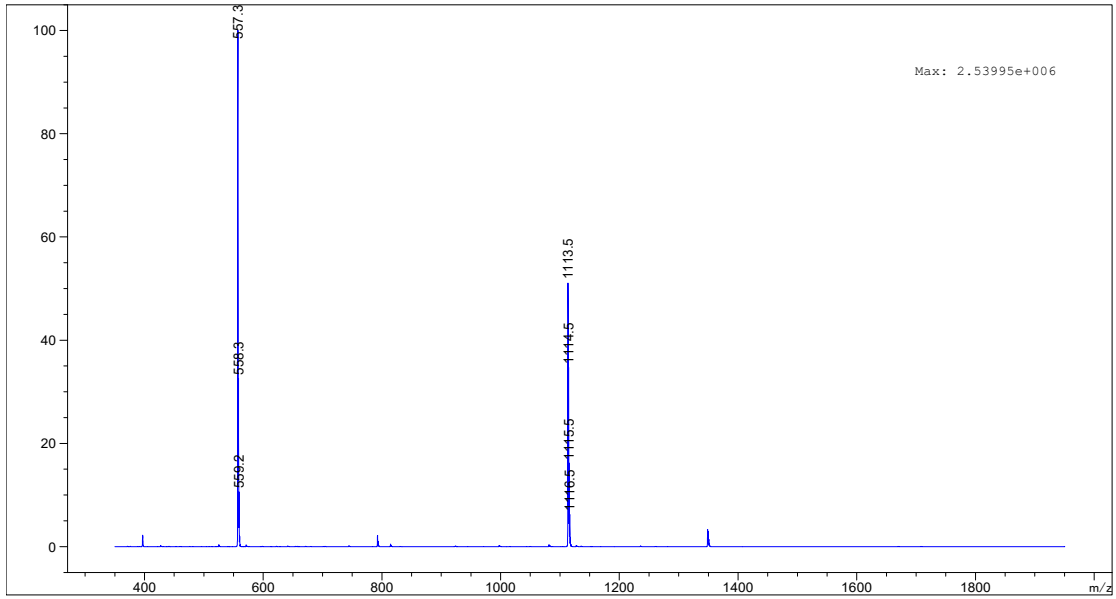

100.Compound **FCWW**: obsvd.  $[M+ H^+] = 640.9$

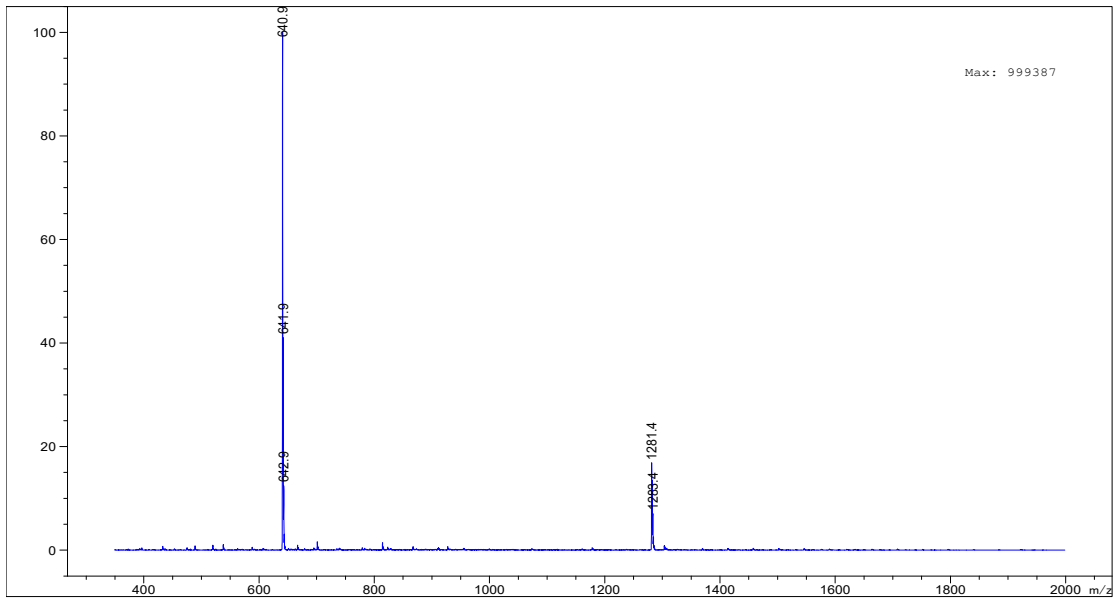

101.Compound **FGWW**: obsvd.  $[M+ H^+] = 595.2$

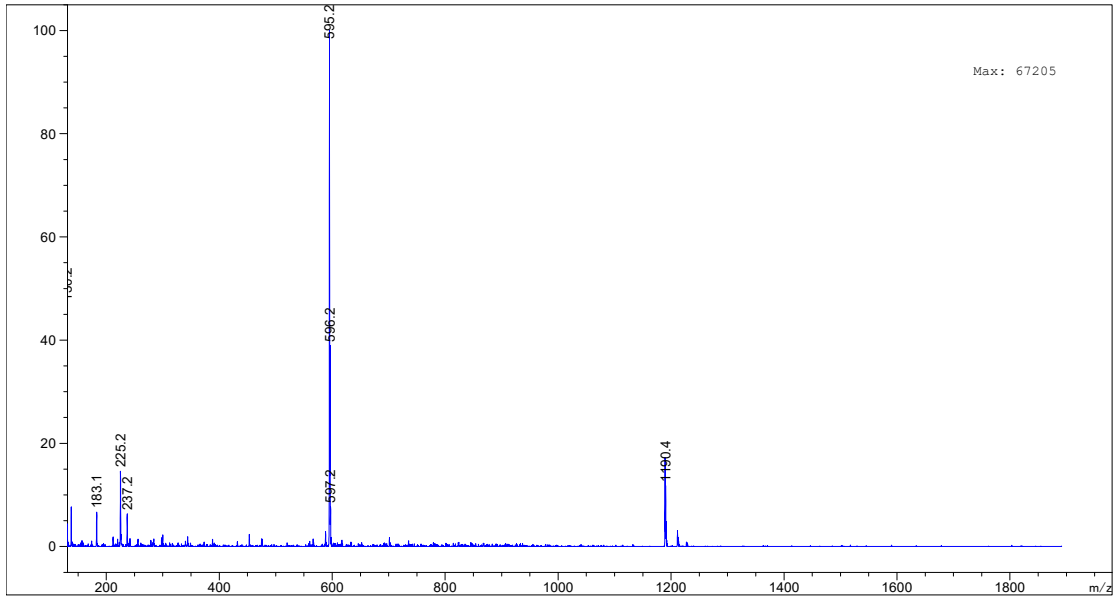

102. Compound **VWIT**: obsvd.  $[M+H^+] = 518.2$

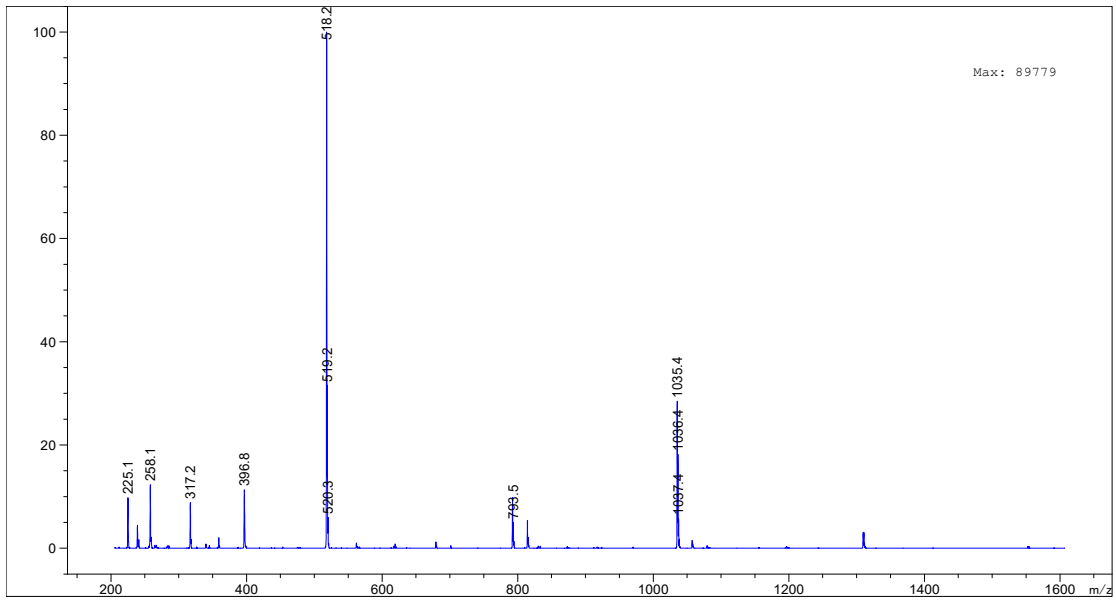

103. Compound **WWCP**: obsvd.  $[M+H^+] = 590.8$

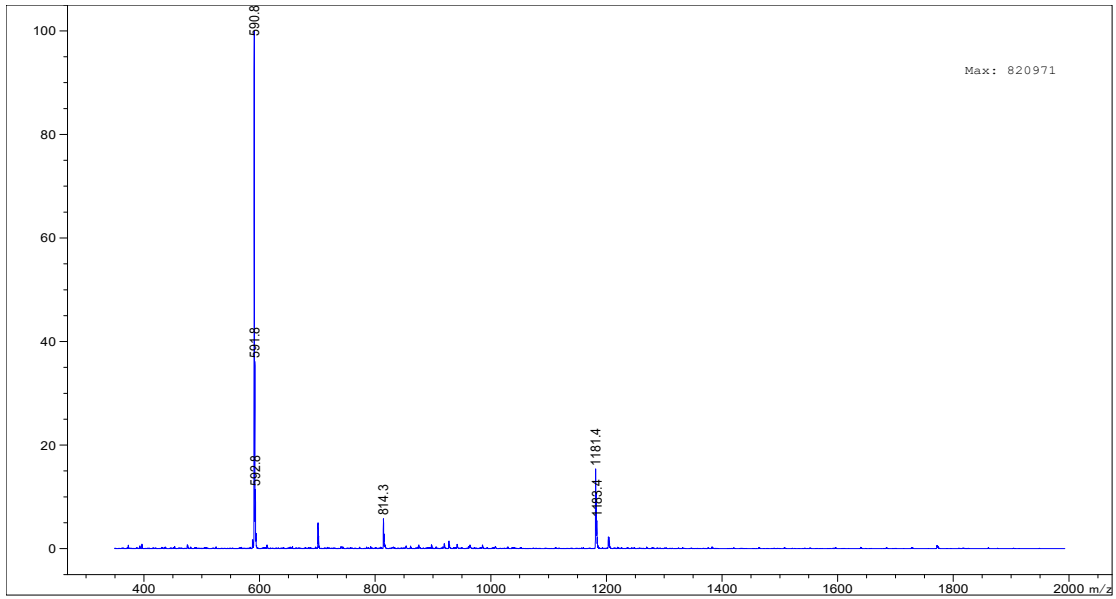

104. Compound **IWPW**: obsvd.  $[M+H^+] = 600.9$

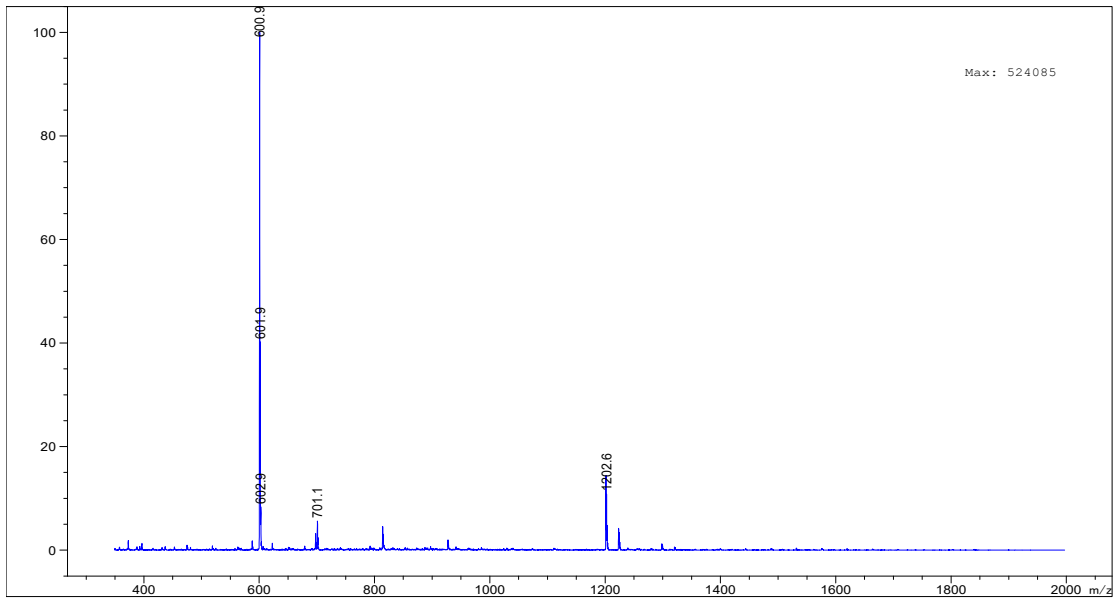

105. Compound **WPYY**: obsvd.  $[M+H^+] = 628.3$

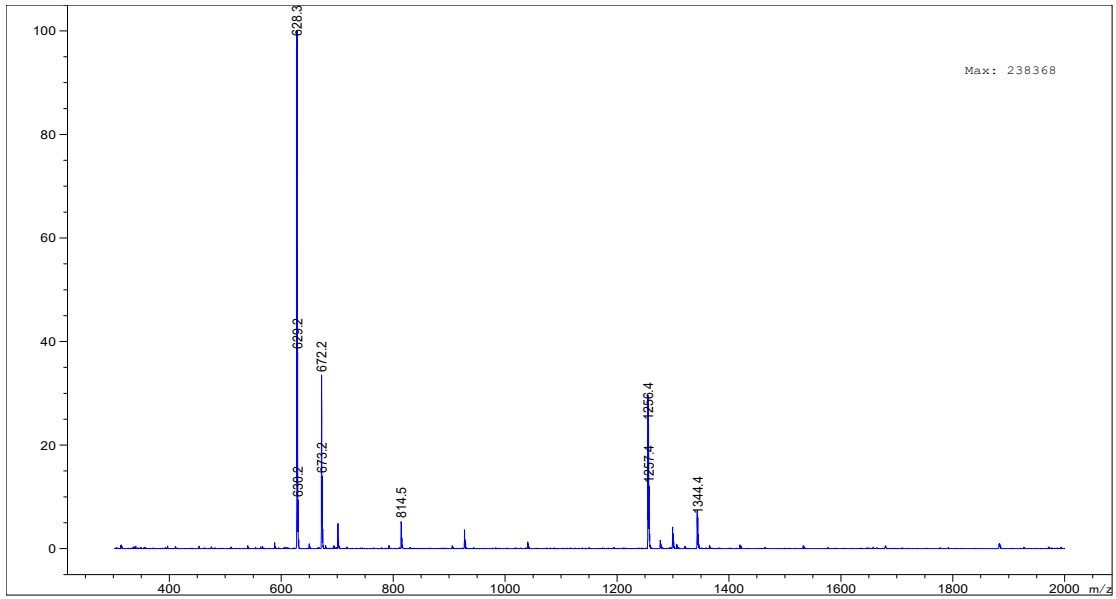

106. Compound VSWY: obsvd.  $[M+H]^+$  = 553.9

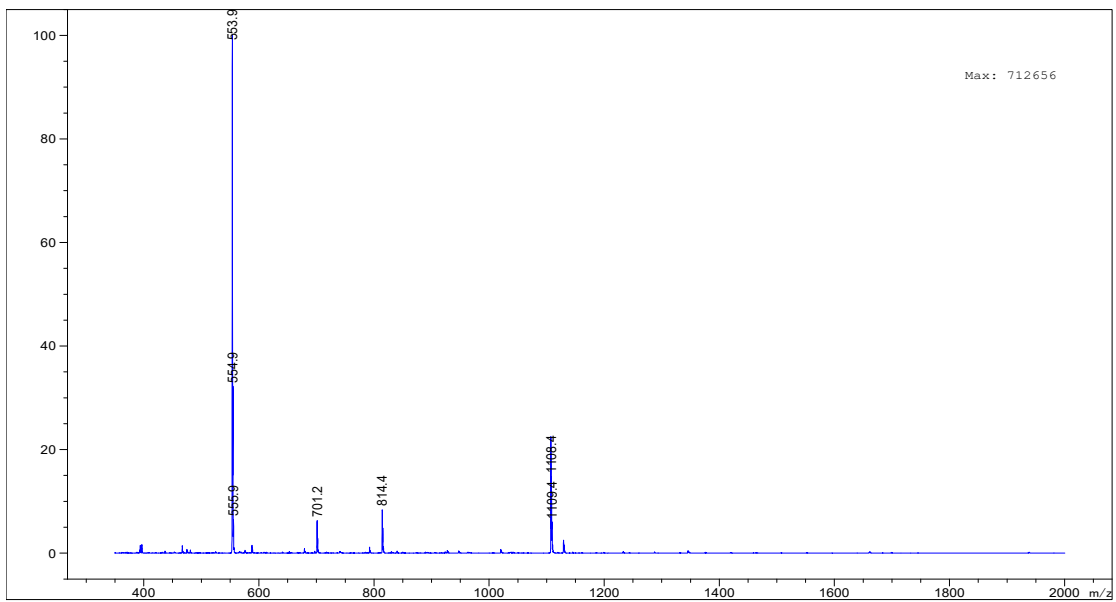

107. Compound CAYW: obsvd.  $[M+H]^+$  = 542.0

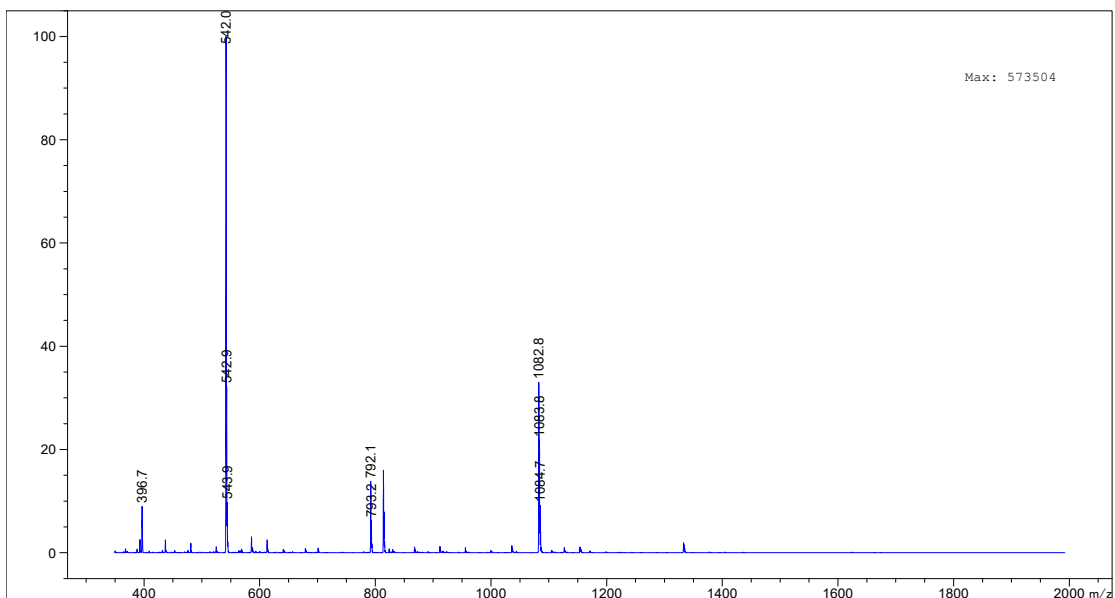

108. Compound PWWY: obsvd.  $[M+H]^+ = 651.4$

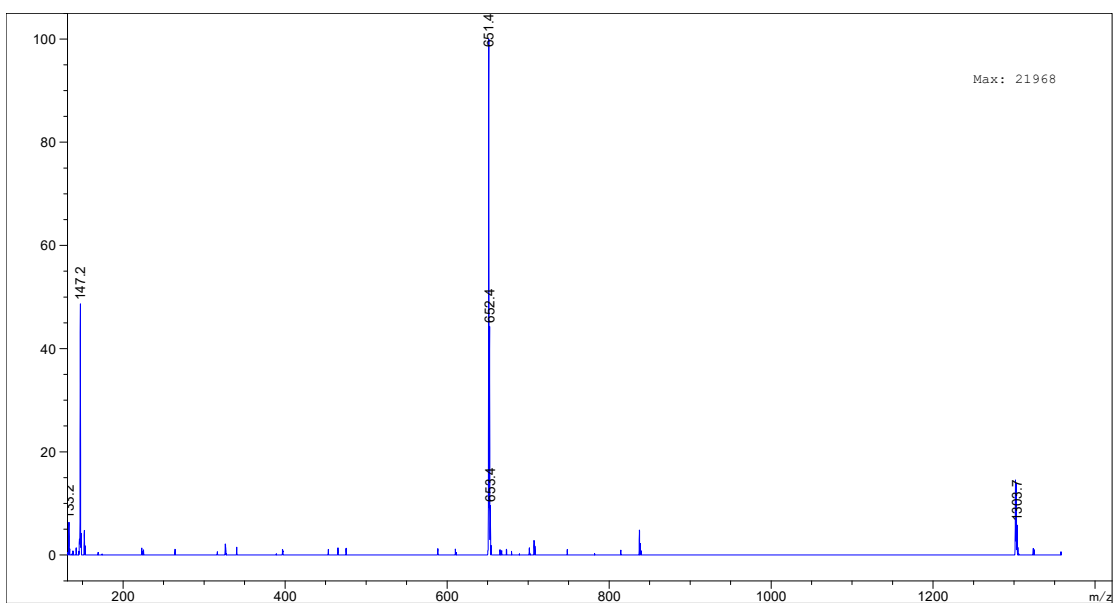

109. Compound AAAA: obsvd.  $[M+H]^+ = 303.3$

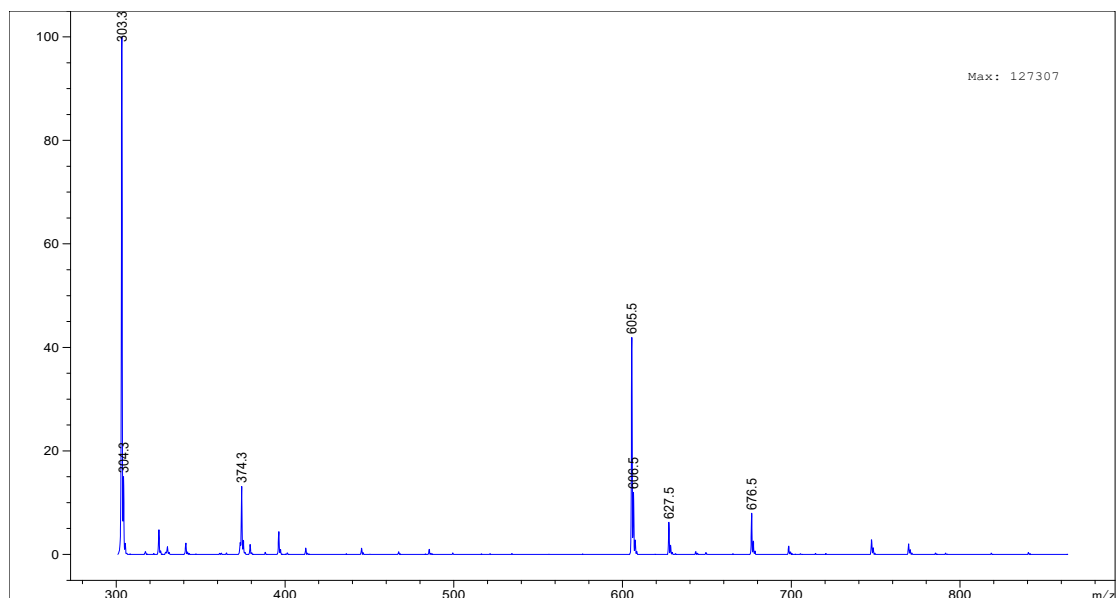

110. Compound **DDDD**: obsvd.  $[M+H^+] = 479.0$

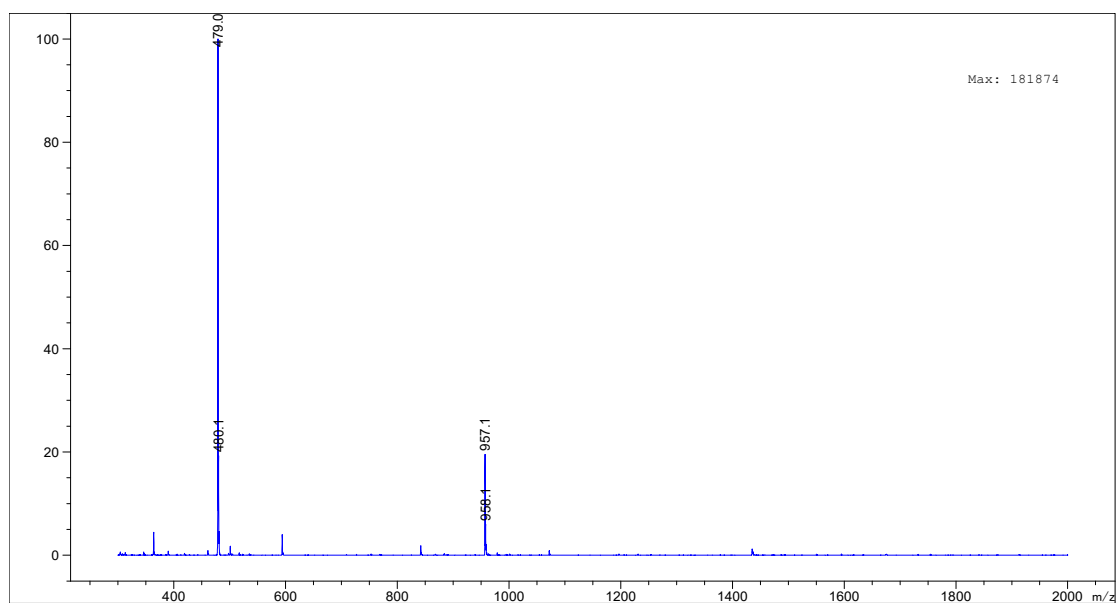

111. Compound **GGGG**: obsvd.  $[M+H^+] = 247.2$

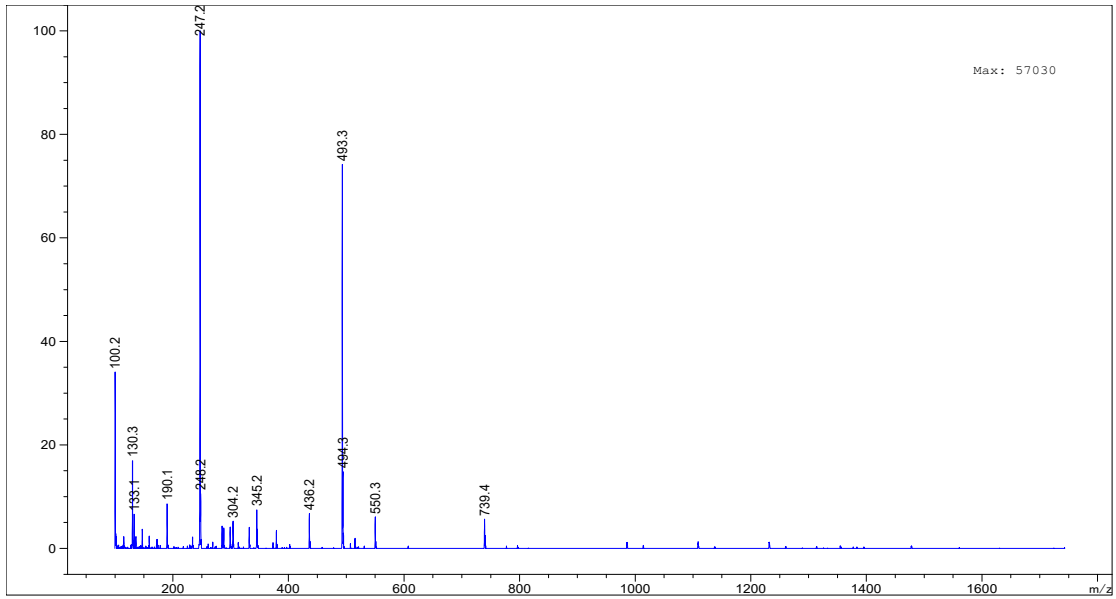

112. Compound **HHHH**: obsvd.  $[M+H^+] = 567.4$

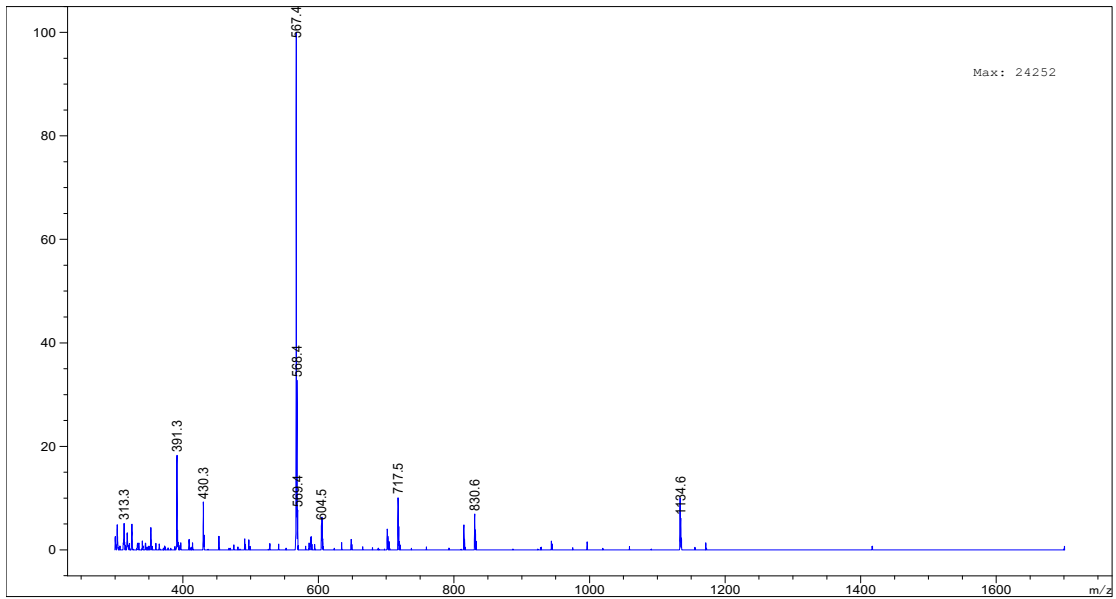

113. Compound **KKKK**: obsvd.  $[M+H^+] = 531.5$



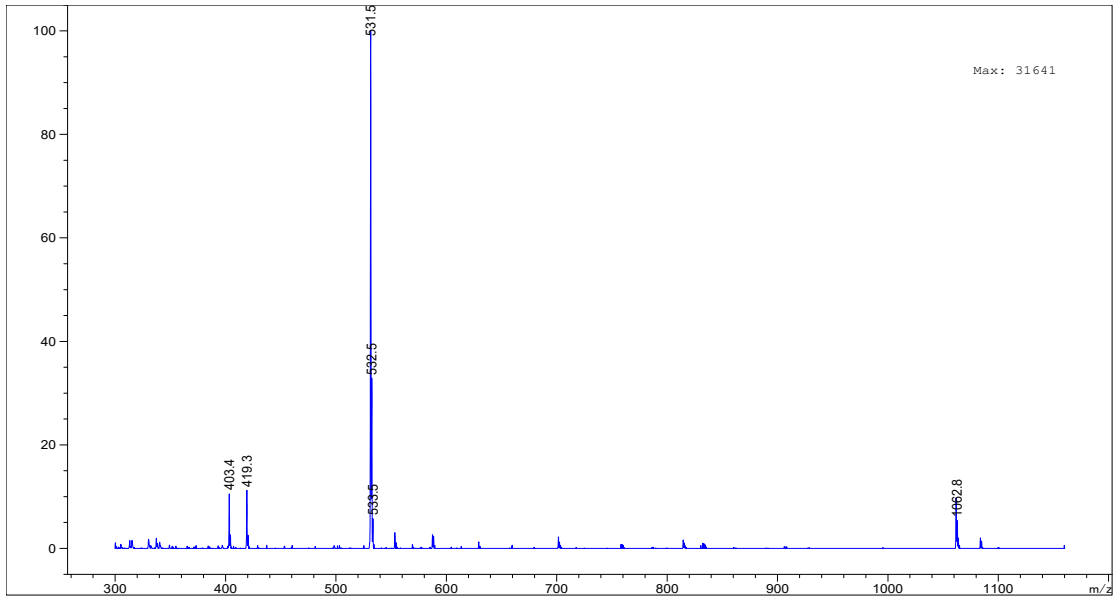

114. Compound RRRR: obsvd.  $[M+H^+] = 643.6$

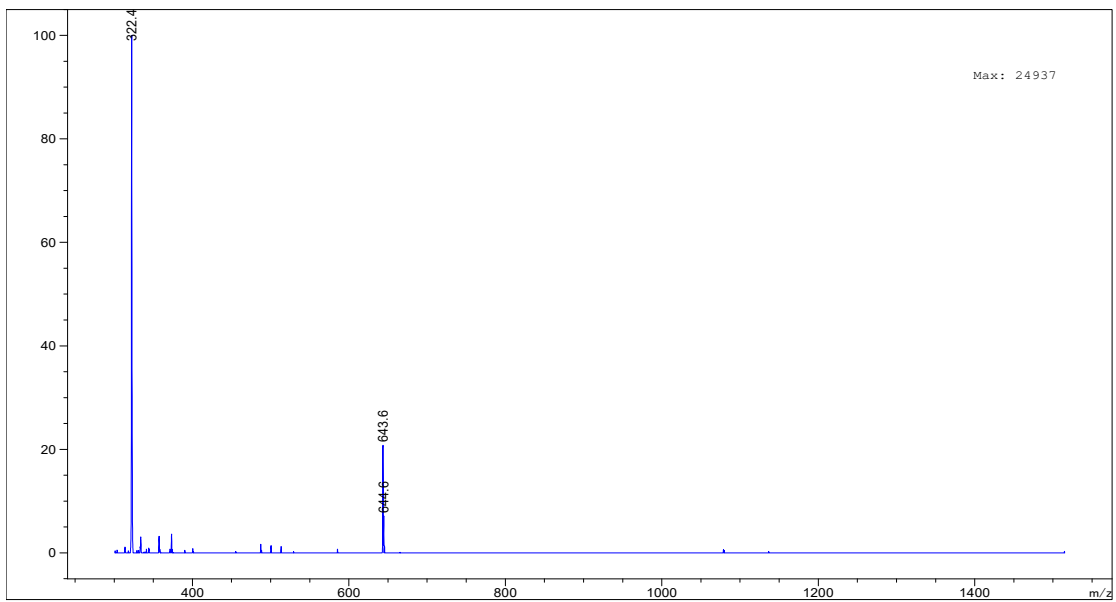

115. Compound YYY Y: obsvd.  $[M+H^+] = 671.4$

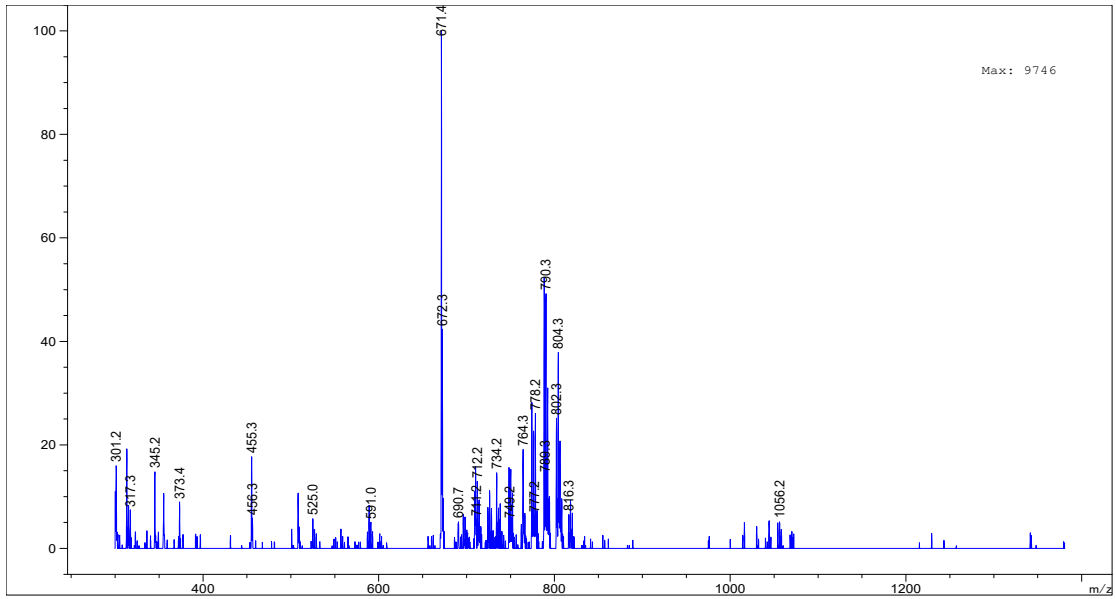

116. Compound **WFHP**: obsvd.  $[M + H^+] = 586.2$

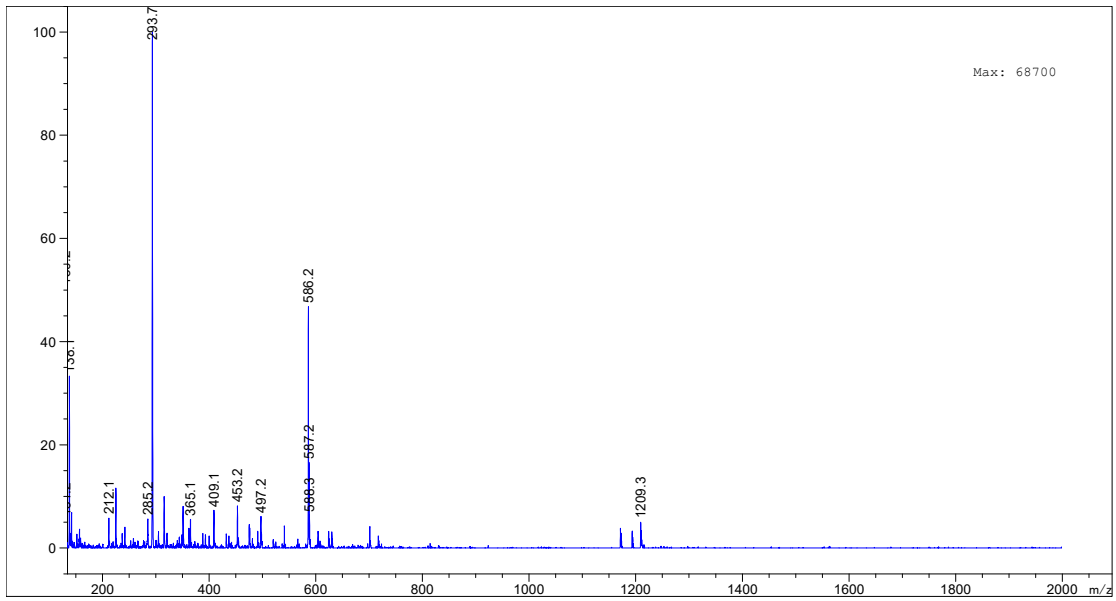

117. Compound **EFFK**: obsvd.  $[M - H^-] = 568.2$

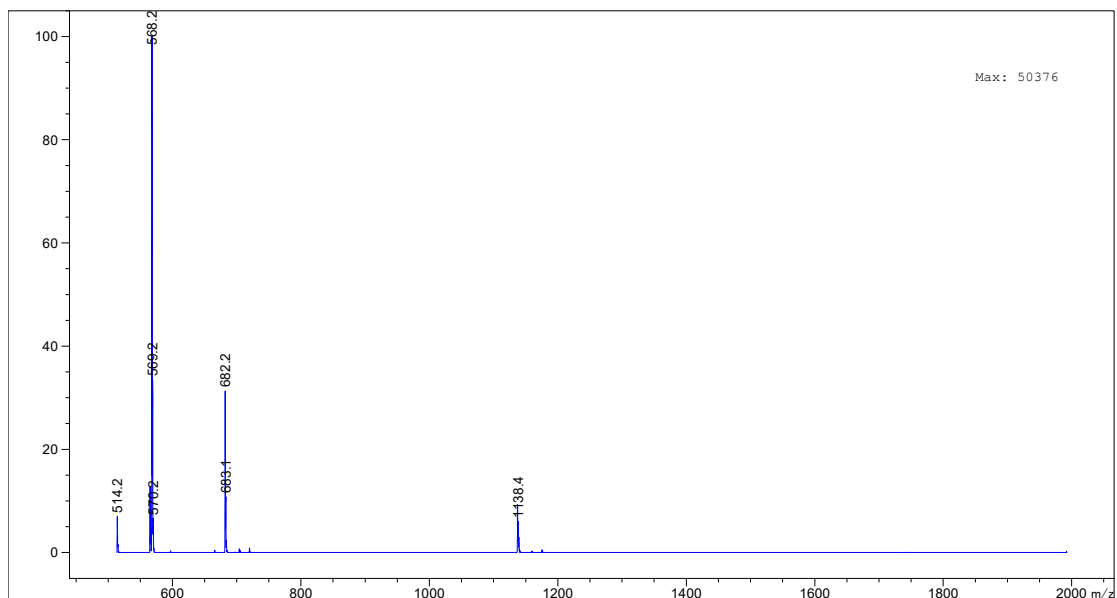

118. Compound **EEKK**: obsvd.  $[M - H^-] = 531.2$

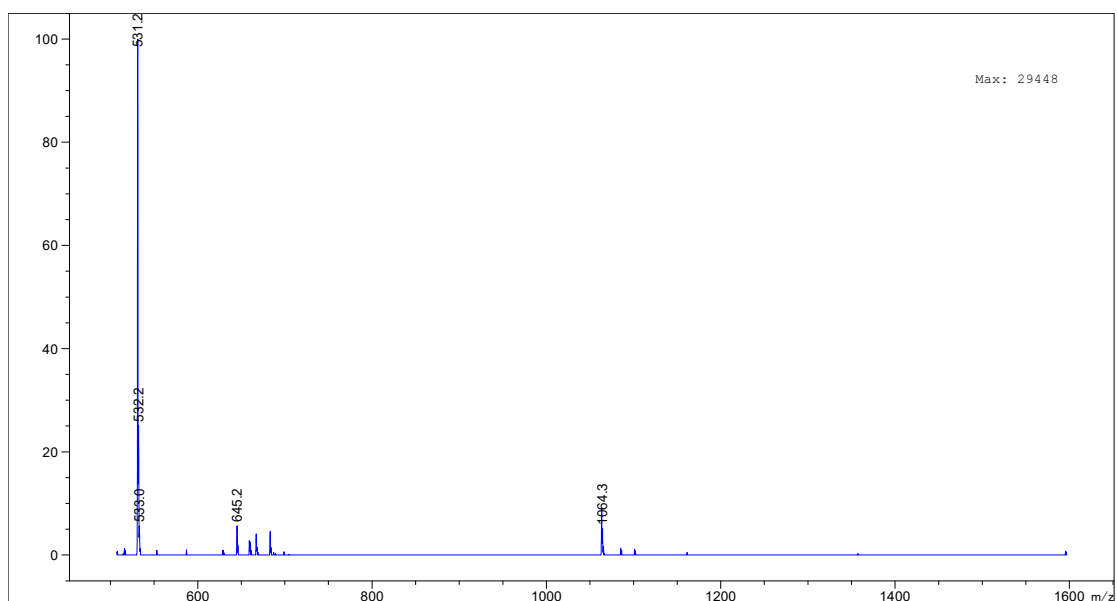

119. Compound **LGVF**: obsvd.  $[M + H^+] = 435.2$

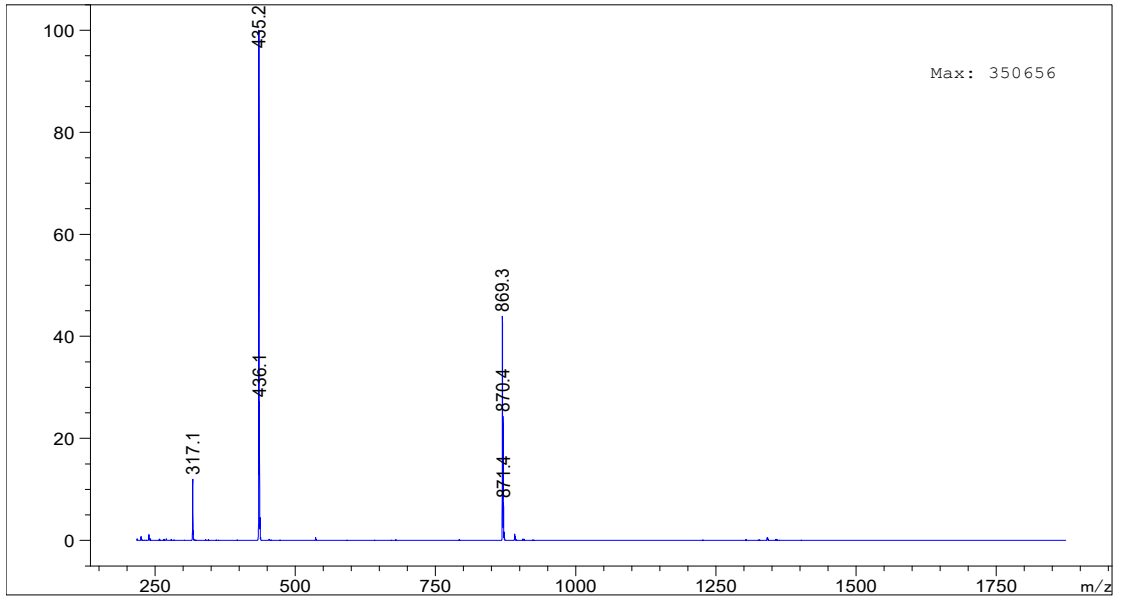

120. Compound RWVF: obsvd.  $[M+H^+] = 607.2$

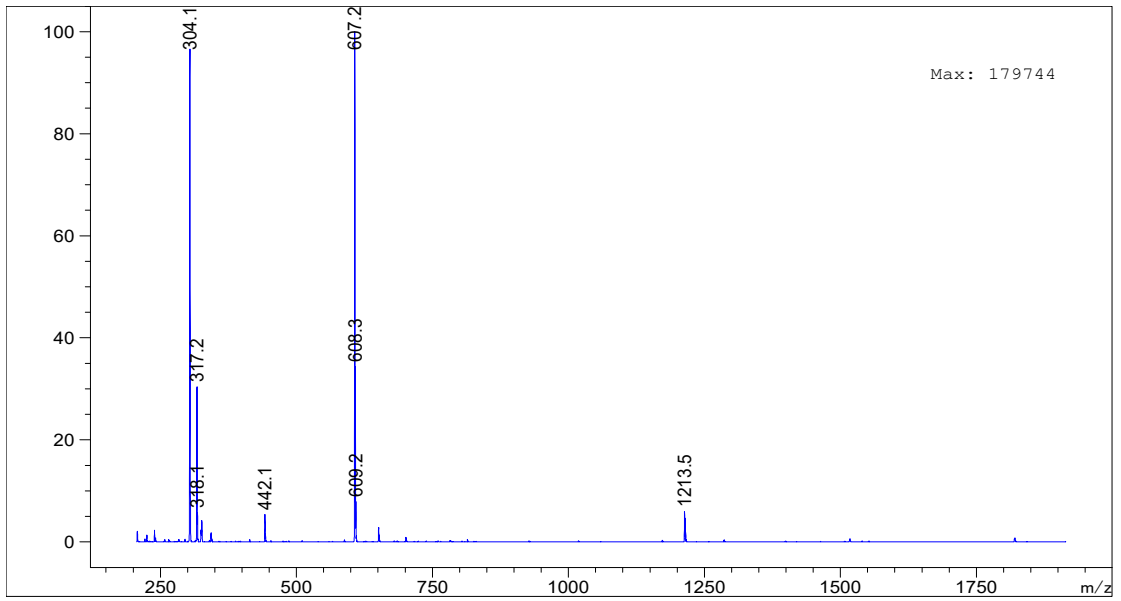

121. Compound VALV: obsvd.  $[M+TFA^-] = 512.6$

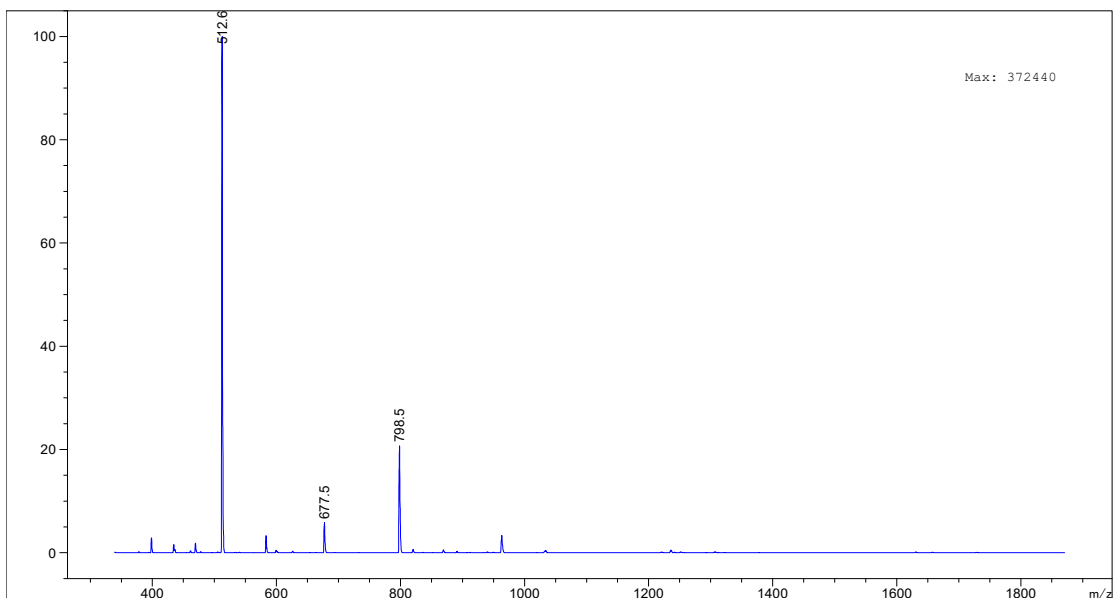

122. Compound **LRFH**: obsvd.  $[M+H^+] = 572.0$

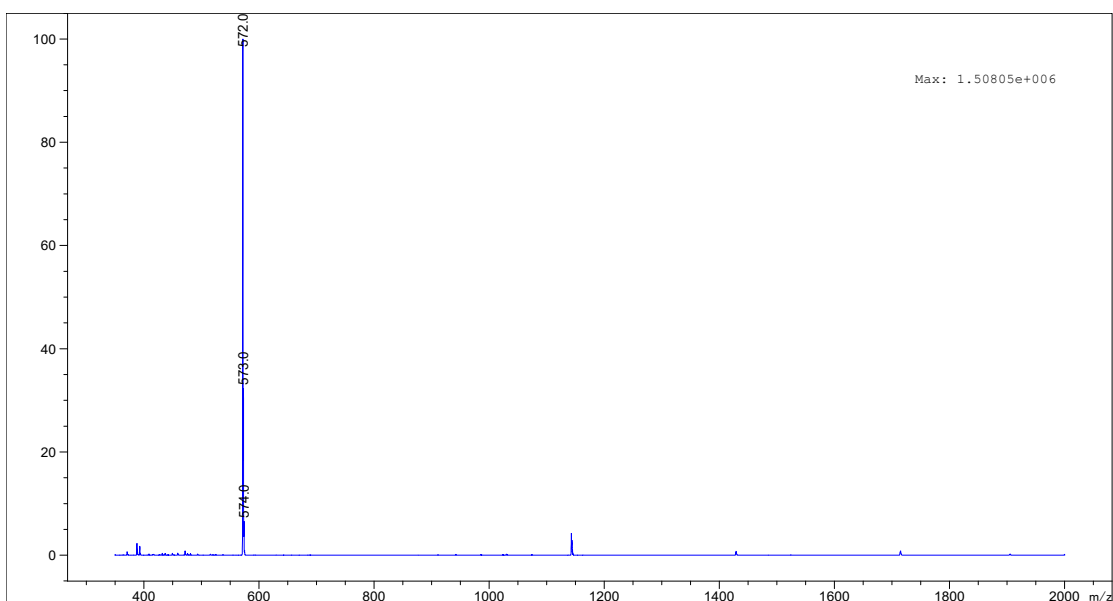

123. Compound **YAYY**: obsvd.  $[M+H^+] = 578.9$

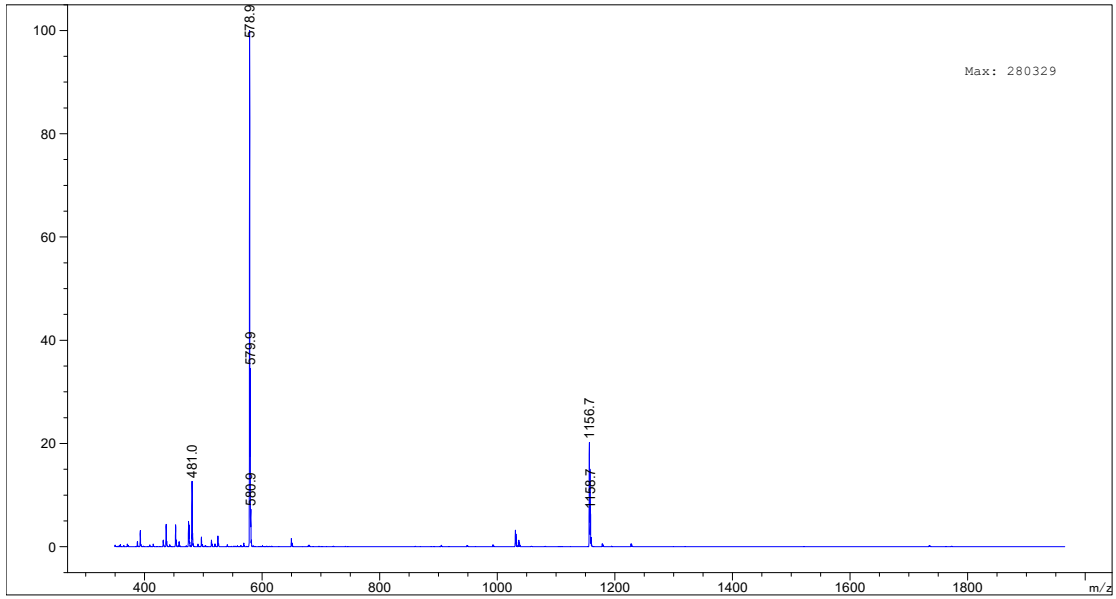

124. Compound PYYI: obsvd.  $[M+H]^+ = 555.0$

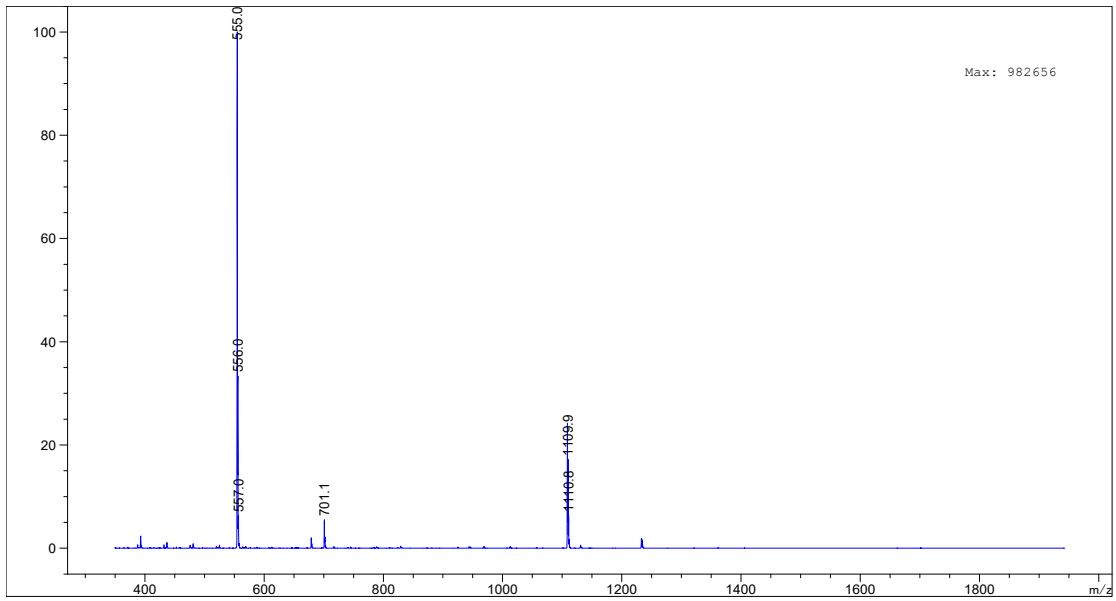

125. Compound PYYI: obsvd.  $[M+H]^+ = 555.0$

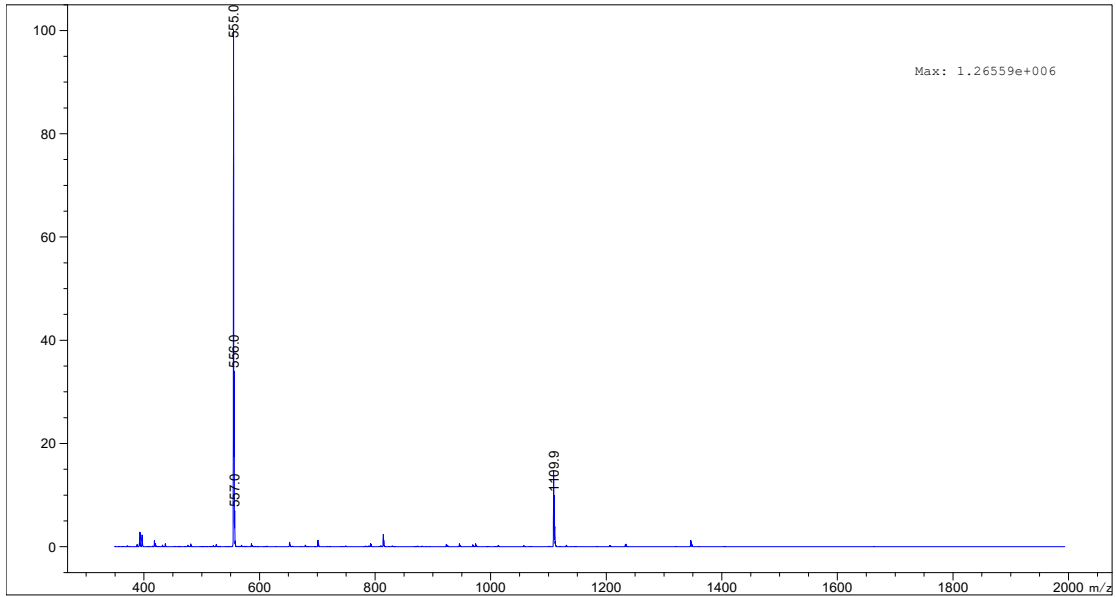

126. Compound **PGWW**: obsvd.  $[M+H]^+ = 545.0$

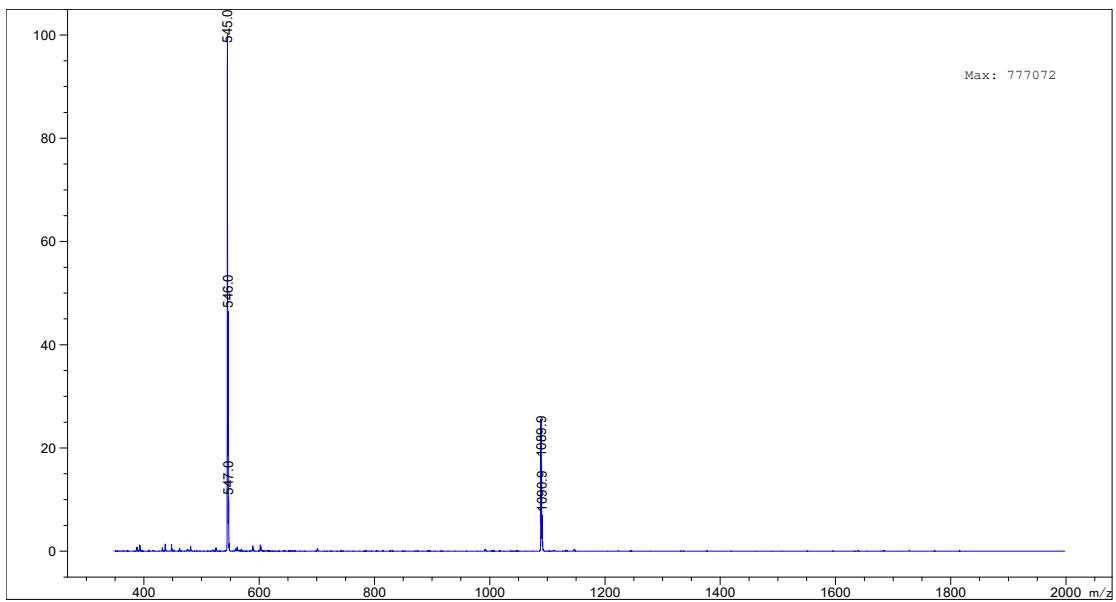

127. Compound **VYTF**: obsvd.  $[M+H]^+ = 529.0$

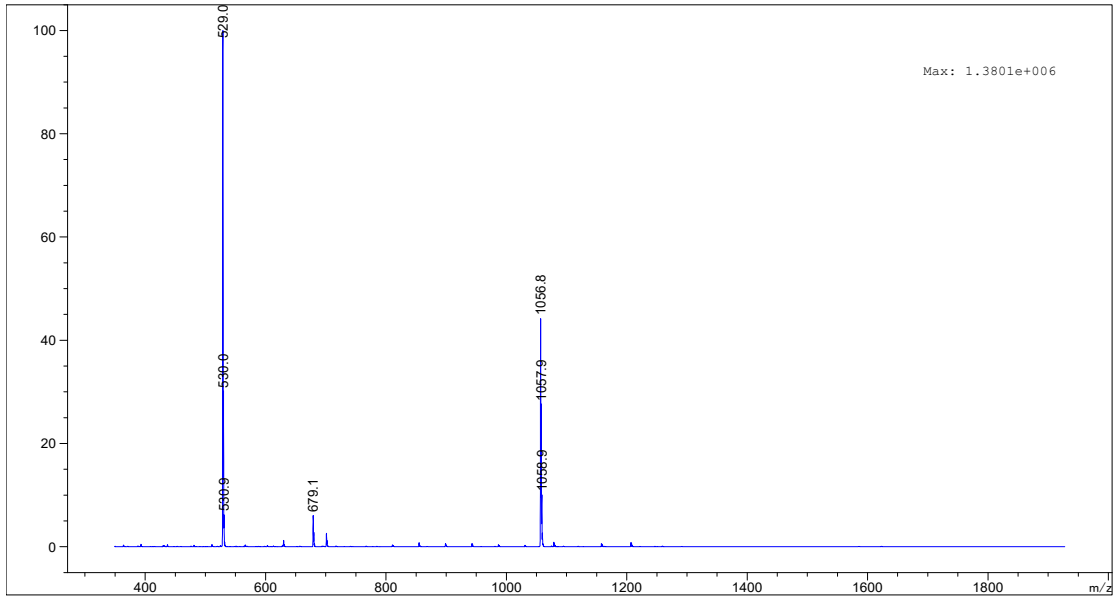

128. Compound **LIII**: obsvd.  $[M+H]^+ = 495.1$

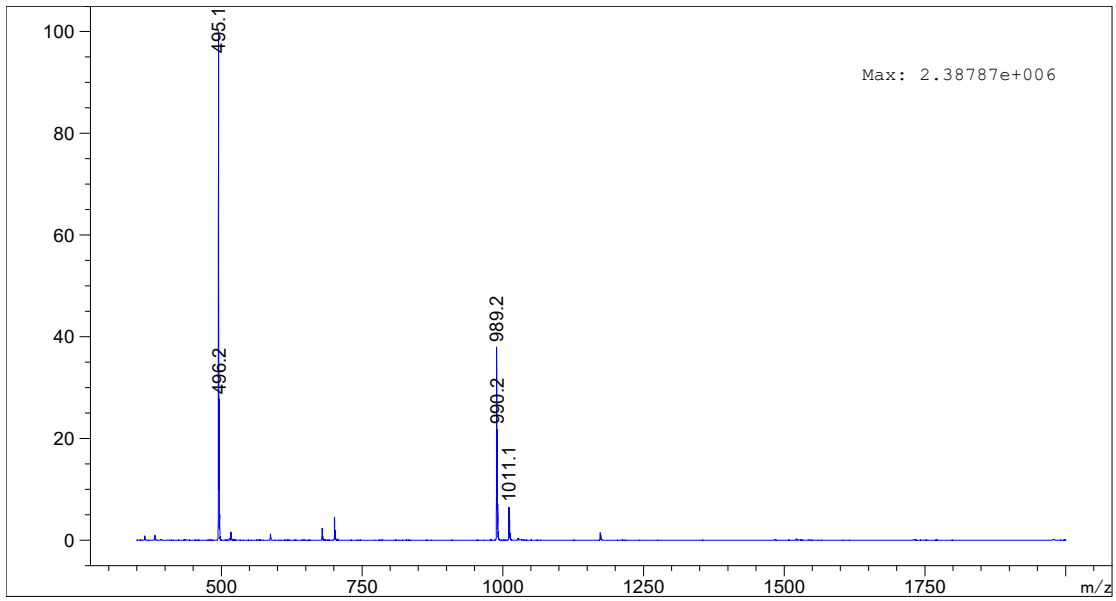

129. Compound **QIII**: obsvd.  $[M+H]^+ = 510.1$



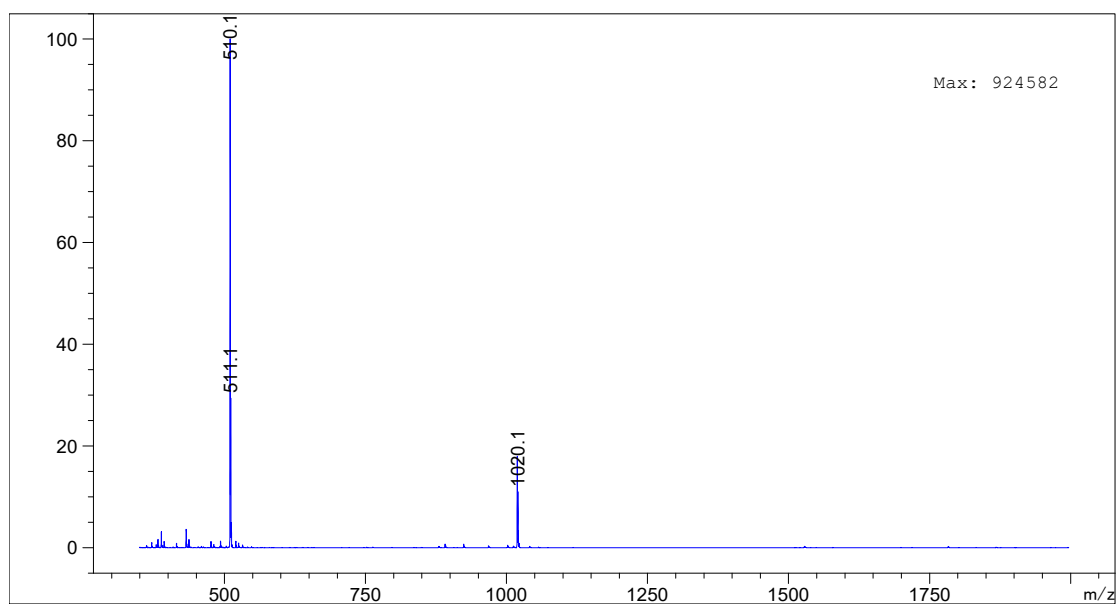

130. Compound **LTWF**: obsvd.  $[M+H^+] = 566.0$

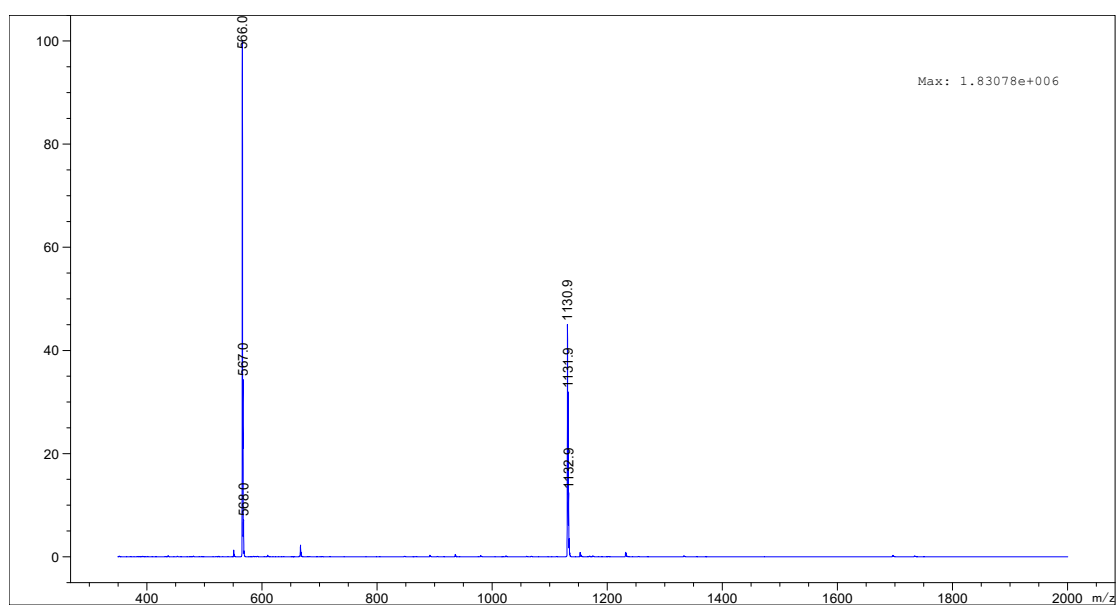

131. Compound **LWFI**: obsvd.  $[M+H^+] = 578.0$

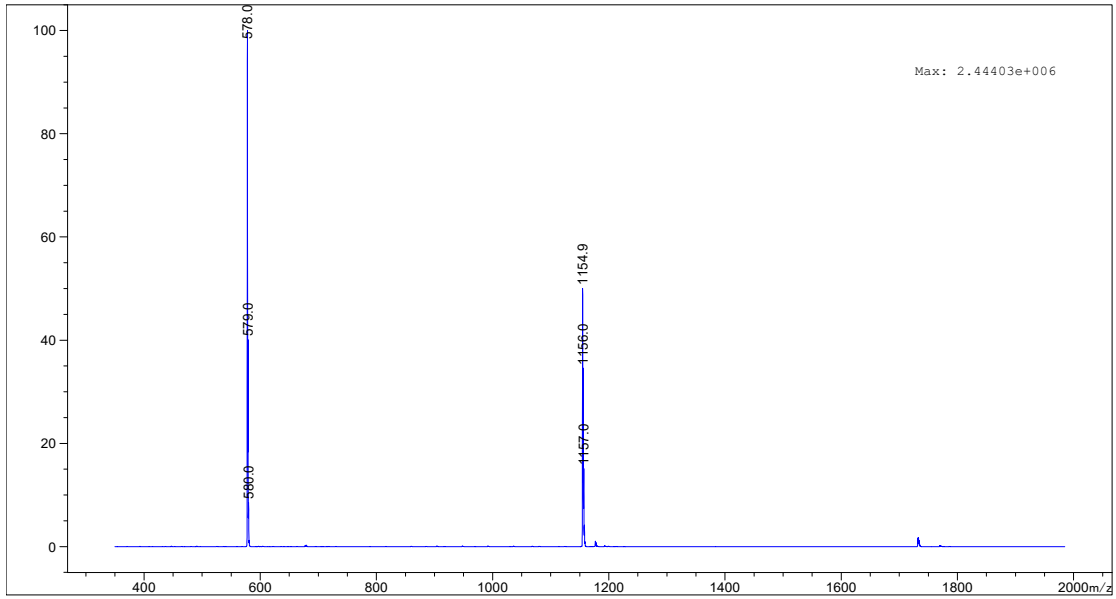

132. Compound **IHFV**: obsvd.  $[M+H]^+ = 515.3$

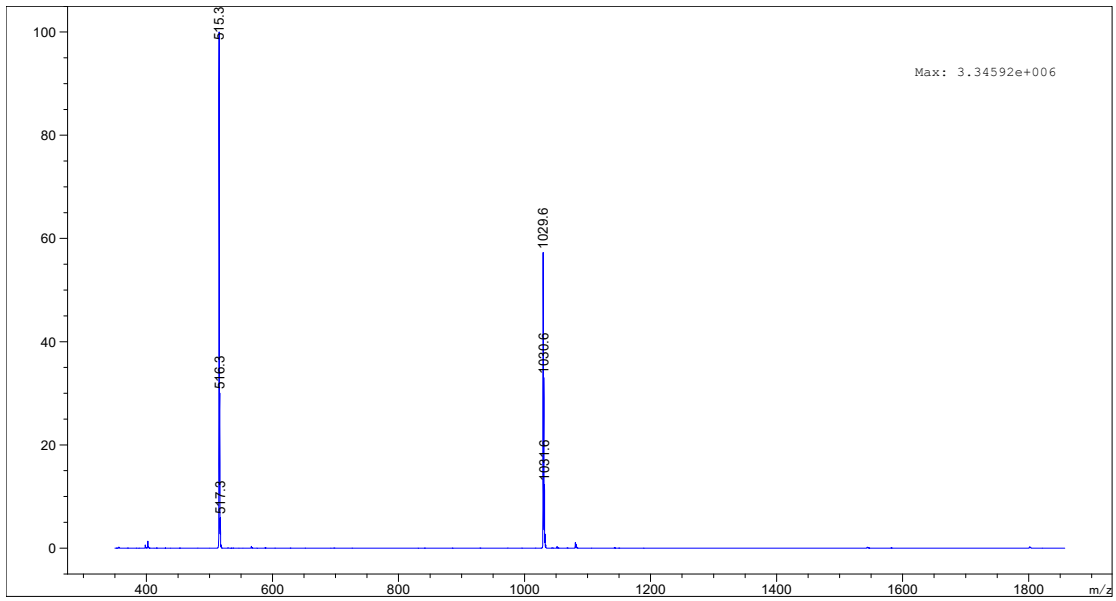

133. Compound **LVPF**: obsvd.  $[M+H]^+ = 475.3$

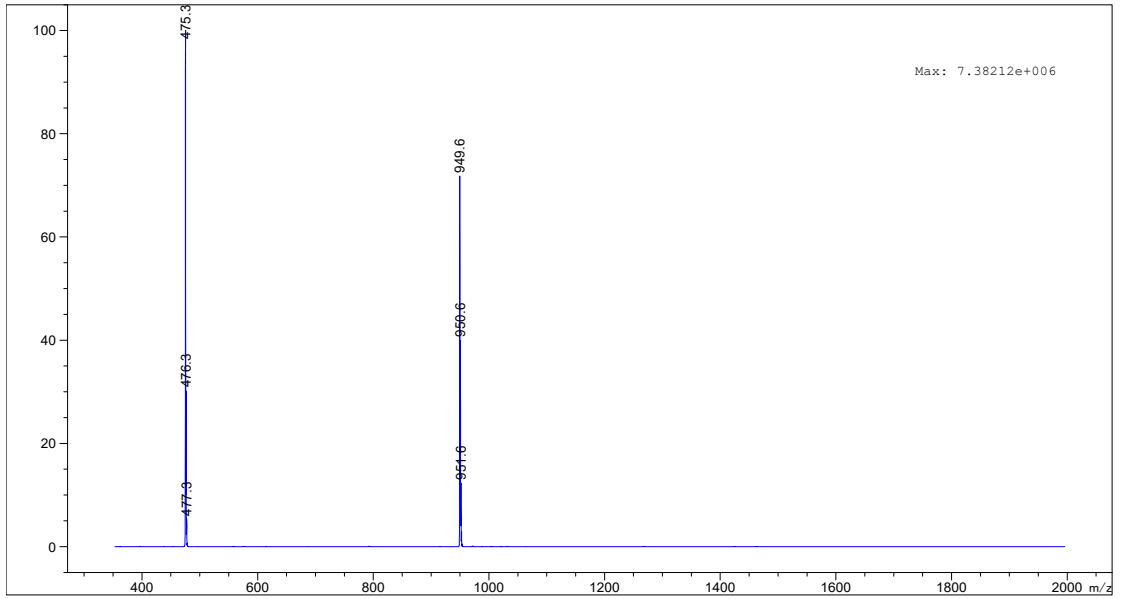

134. Compound **FMYS**: obsvd.  $[M+H]^+ = 547.0$

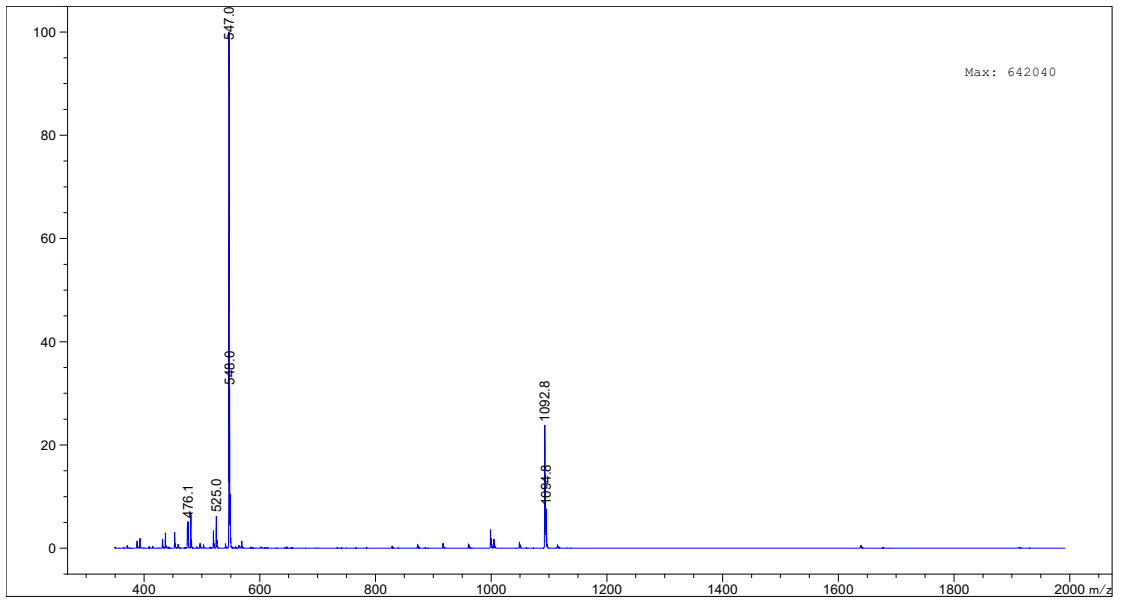

135. Compound **KFL**: obsvd.  $[M+H]^+ = 520.1$

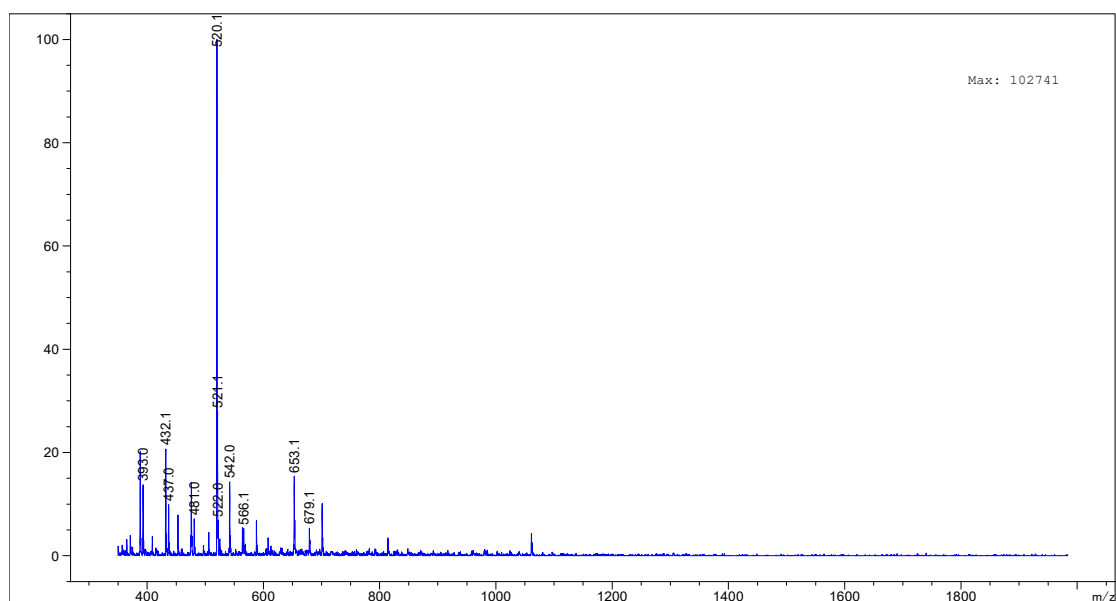

136. Compound VFGV: obsvd.  $[M+H]^+ = 421.1$

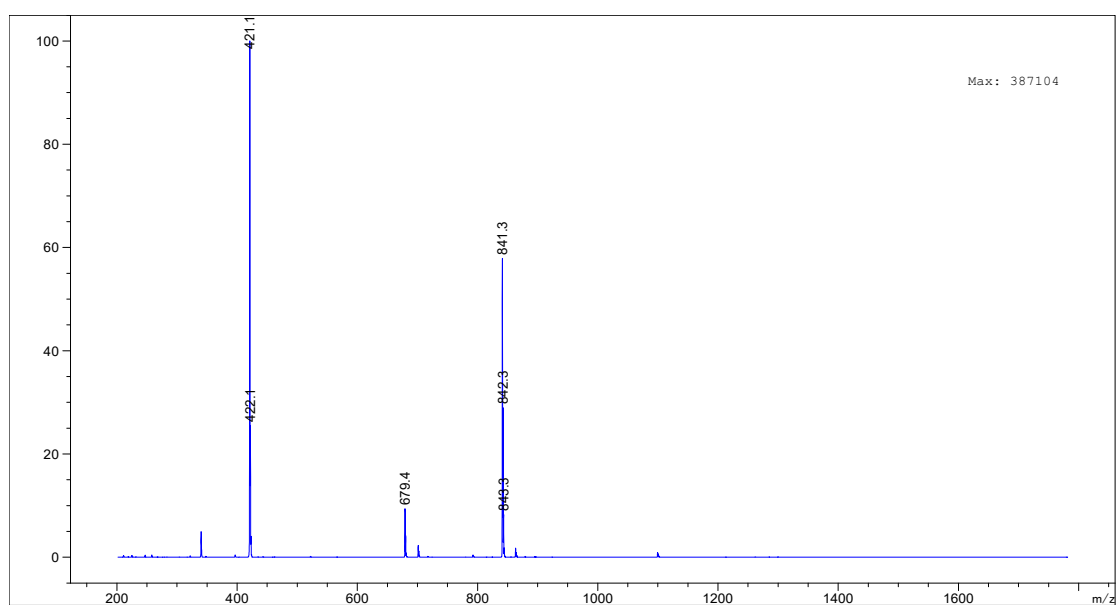

137. Compound CCCC: obsvd.  $[M+H]^+ = 431.1$

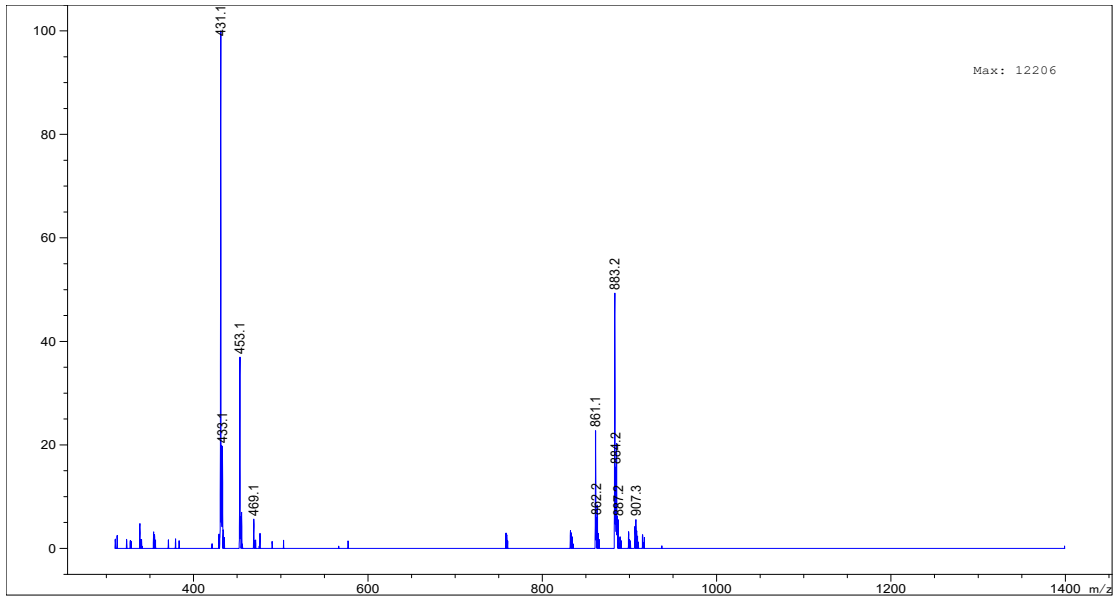

138. Compound **EEE**: obsvd.  $[M+H^+] = 535.3$

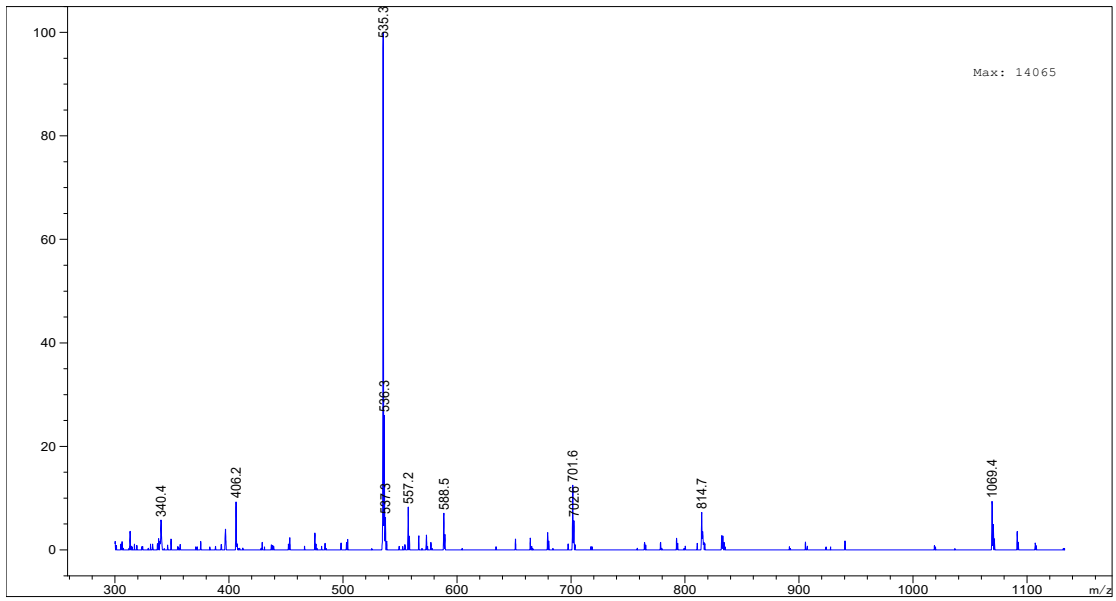

139. Compound **PPP**: obsvd.  $[M+H^+] = 407.2$

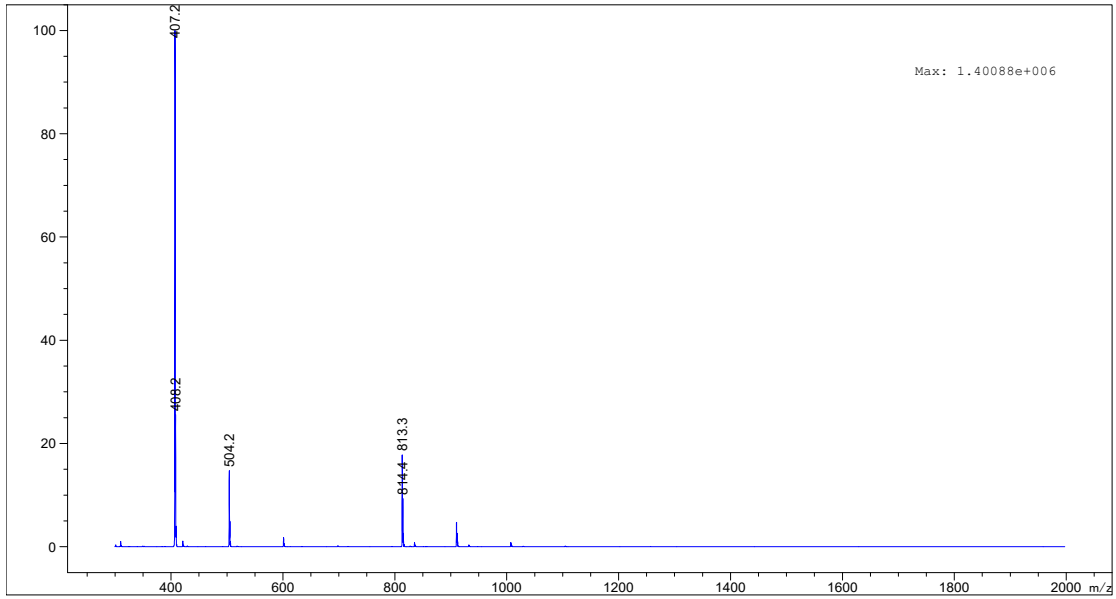

140. Compound QQQQ: obsvd.  $[M+H^+] = 531.2$

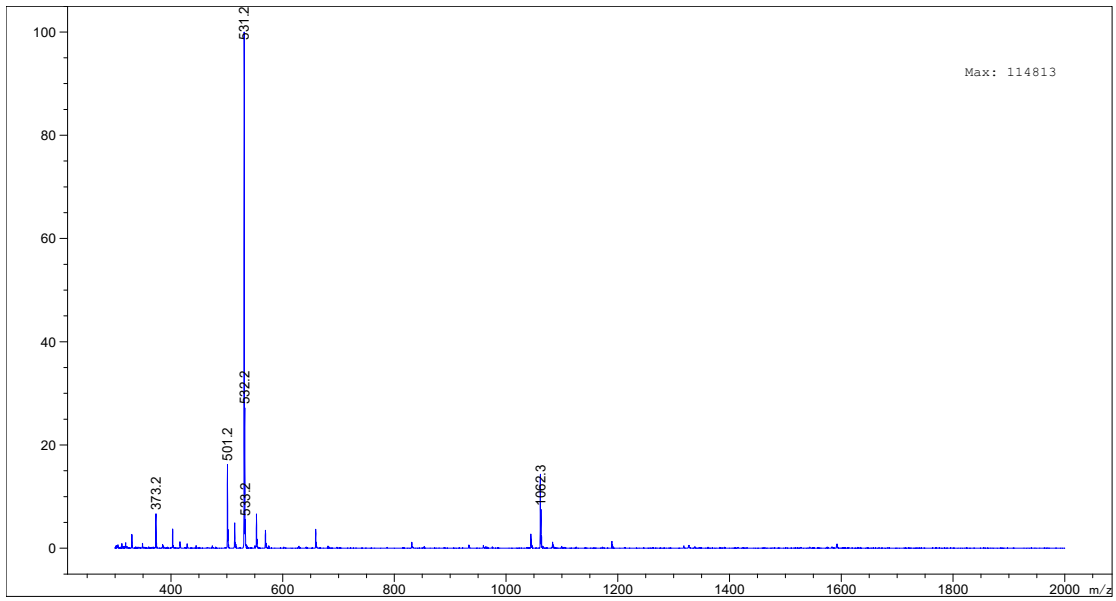

141. Compound SSSS: obsvd.  $[M+H^+] = 367.2$

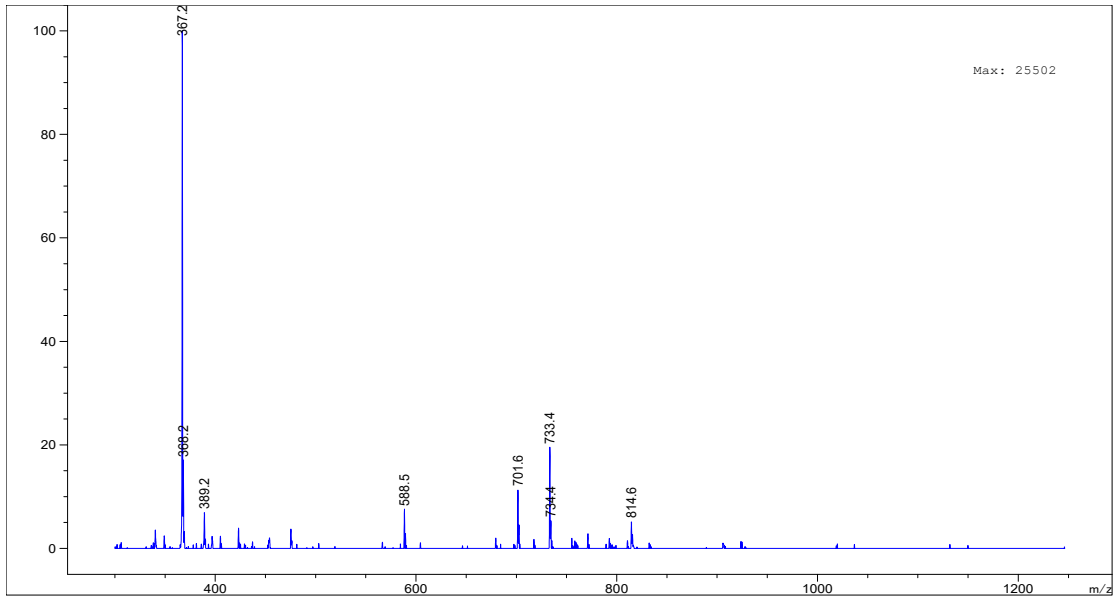

142. Compound TTTT: obsvd.  $[M+H^+] = 423.4$

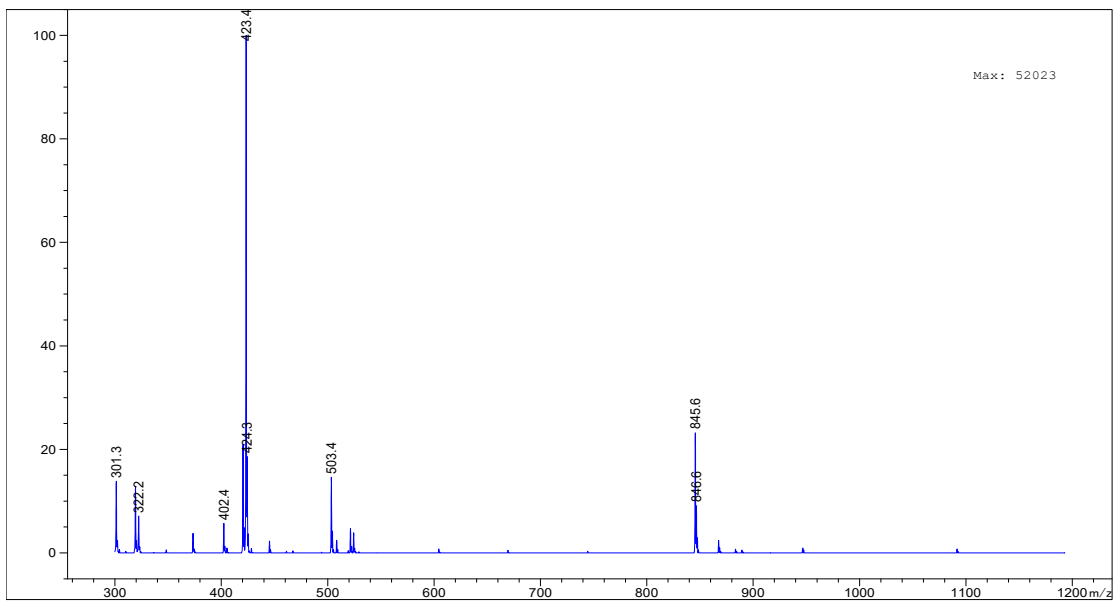

143. Compound WWWW: obsvd.  $[M+H^+] = 763.5$

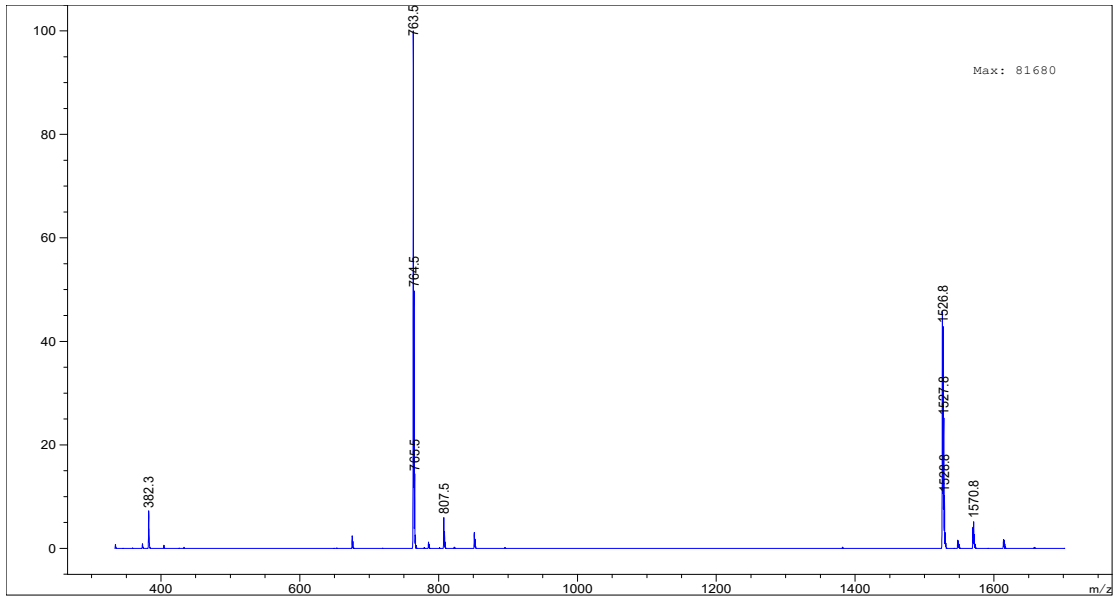

144. Compound CWFT: obsvd.  $[M+H]^+ = 555.9$

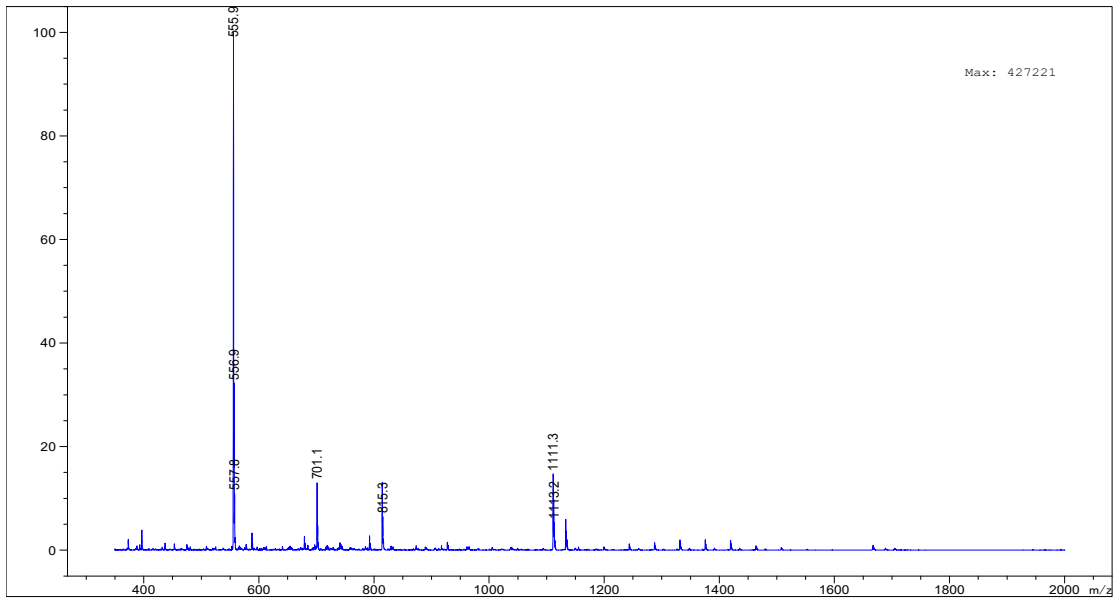

145. Compound IRVW: obsvd.  $[M+H]^+ = 572.9$



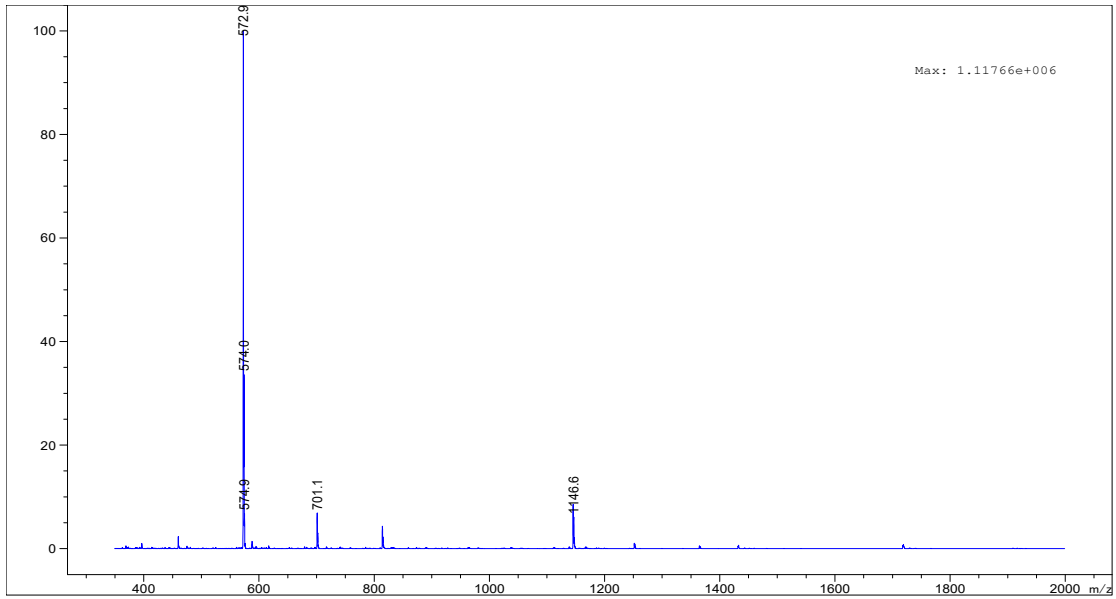

146. Compound NVFH: obsvd.  $[M+H^+] = 516.2$

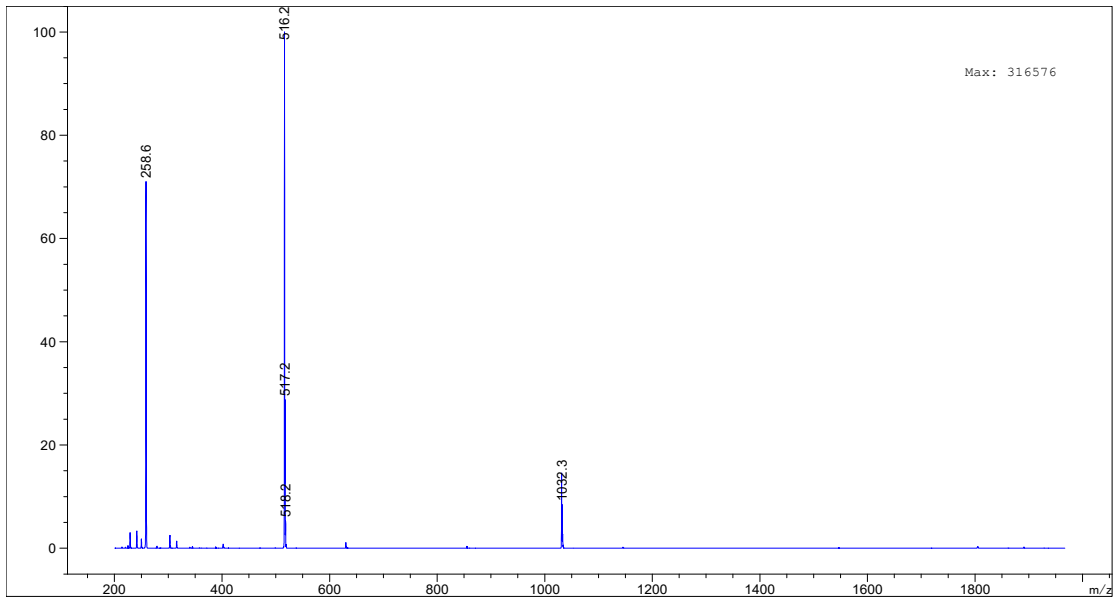

147. Compound VFHN: obsvd.  $[M+H^+] = 516.2$

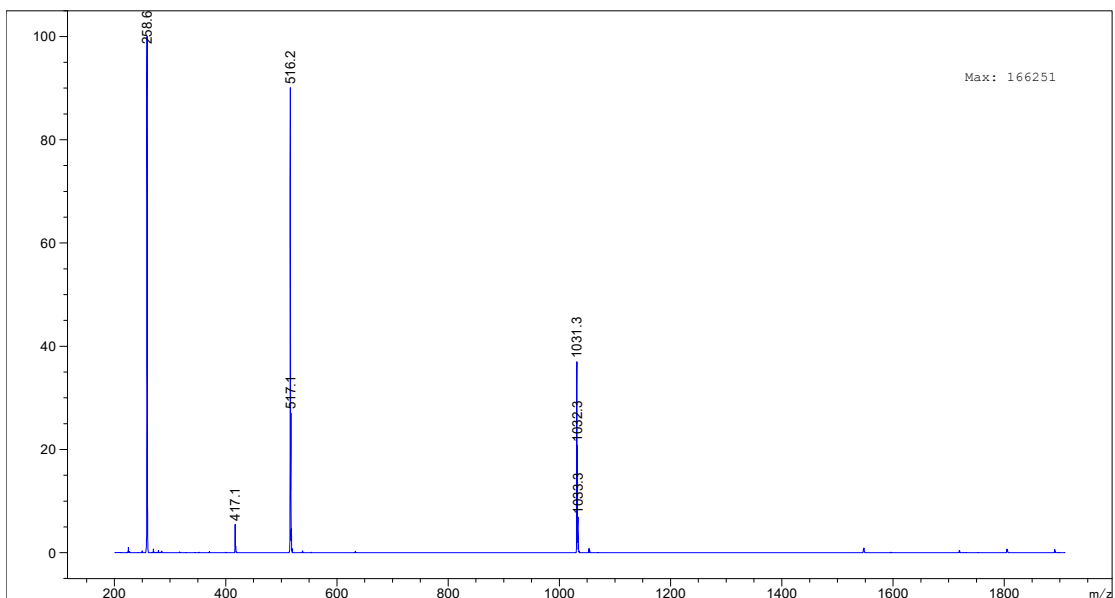

148. Compound CFLW: obsvd.  $[M+H^+] = 567.9$

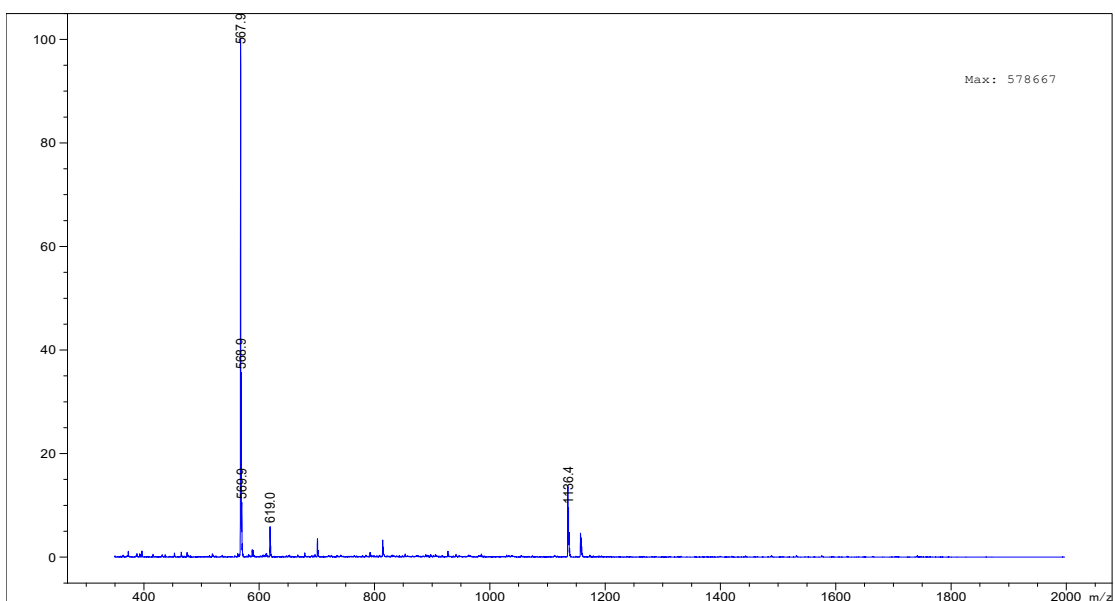

149. Compound MMY: obsvd.  $[M+H^+] = 606.9$

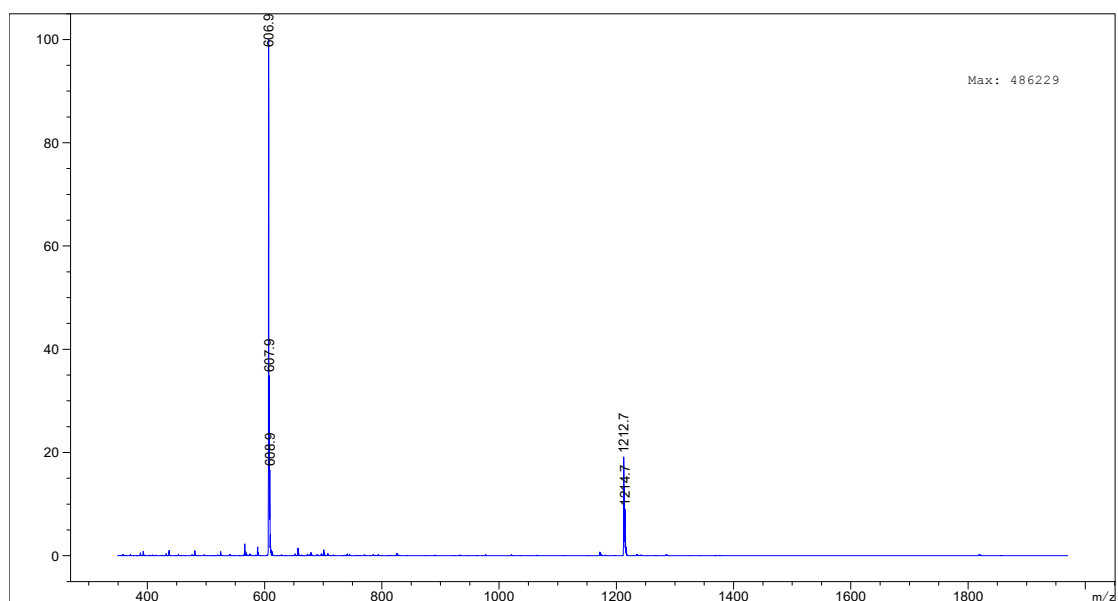

150. Compound **GLLY**: obsvd.  $[M+H]^+ = 464.5$

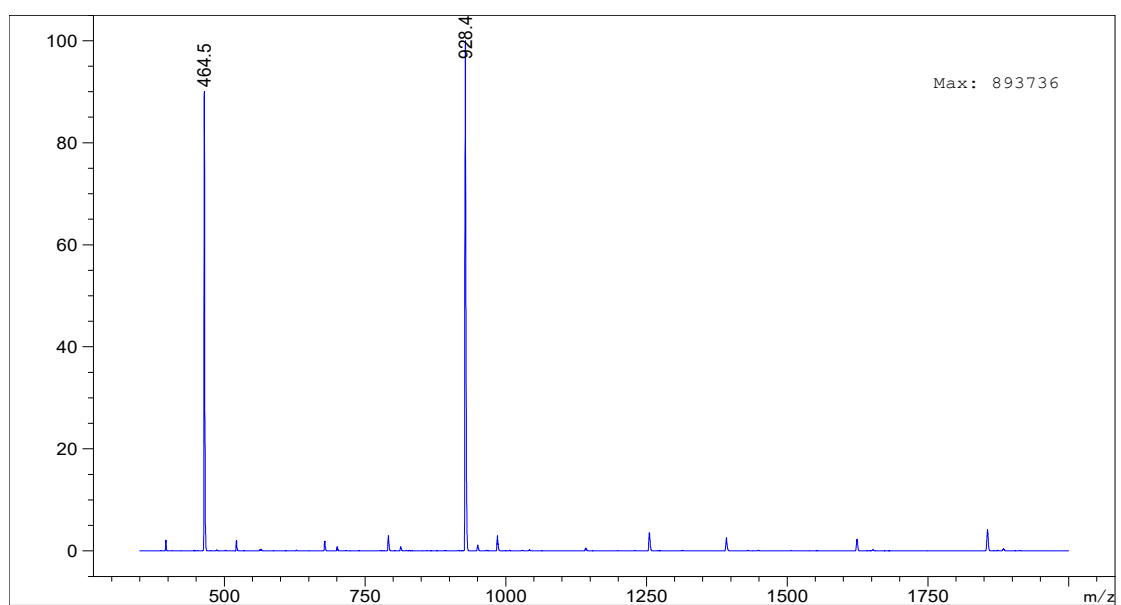

151. Compound **KMLF**: obsvd.  $[M+H]^+ = 538.0$

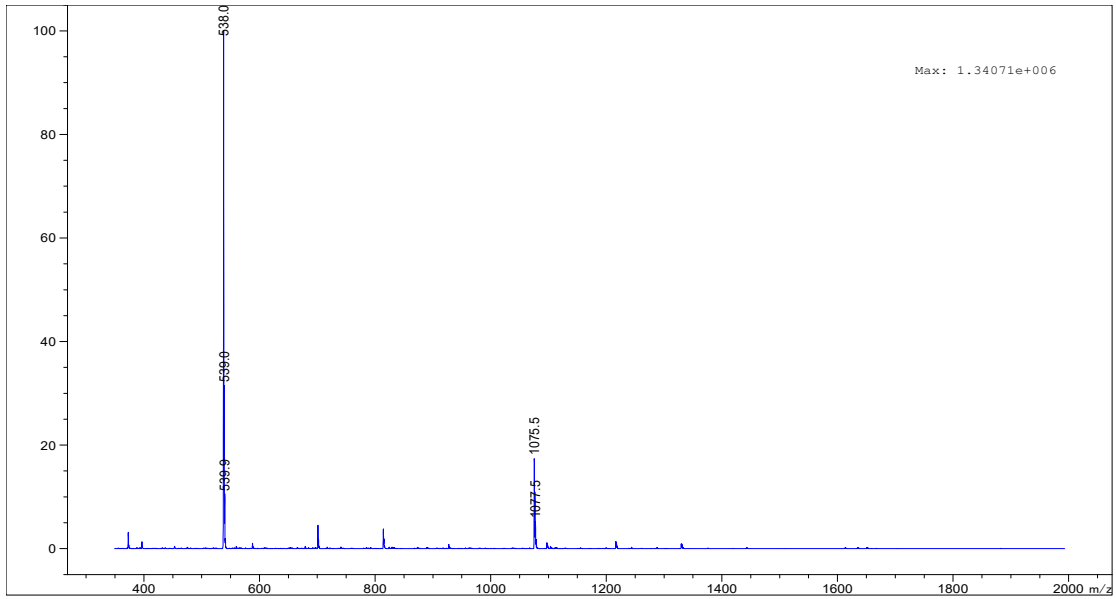

152. Compound **IWII**: obsvd.  $[M+H]^+ = 544.0$

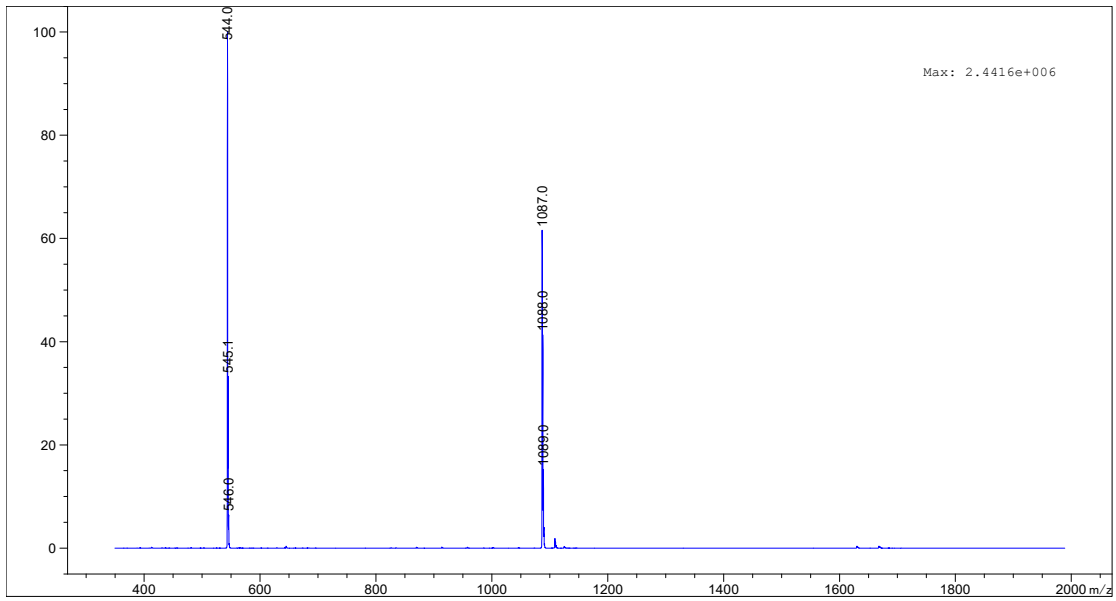

153. Compound **WVFI**: obsvd.  $[M+H]^+ = 564.0$

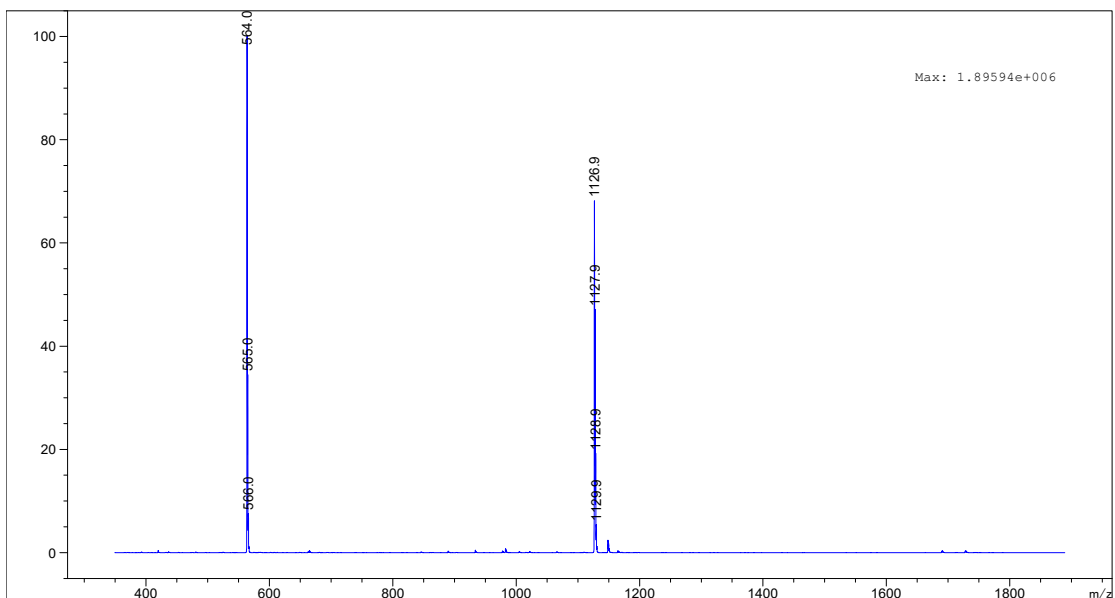

154. Compound **IIR**: obsvd.  $[M+H^+] = 514.4$

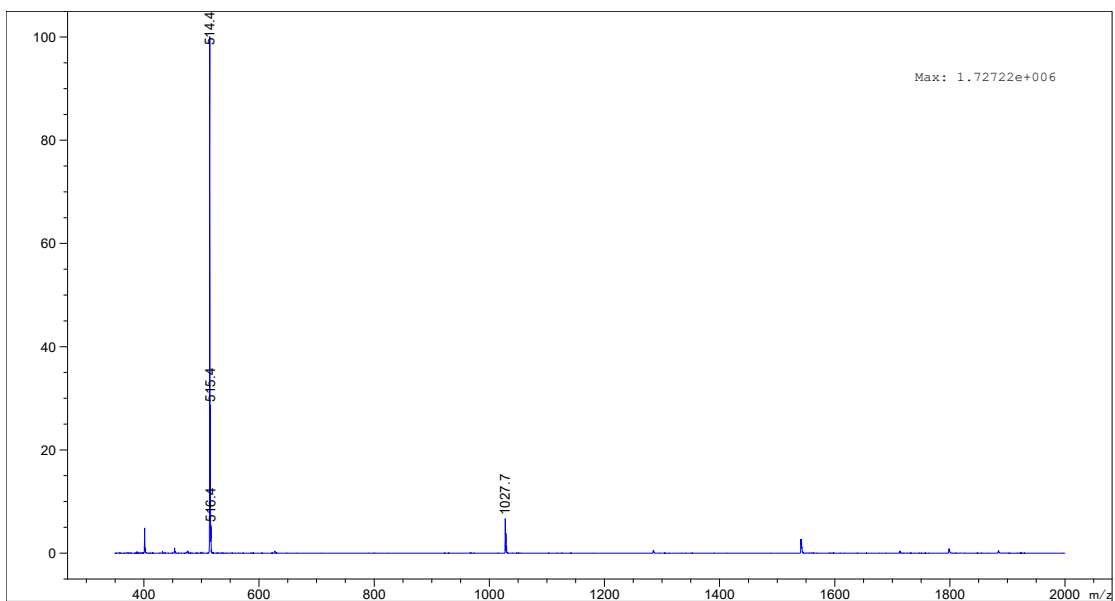

155. Compound **AVIQ**: obsvd.  $[M+H^+] = 429.9$

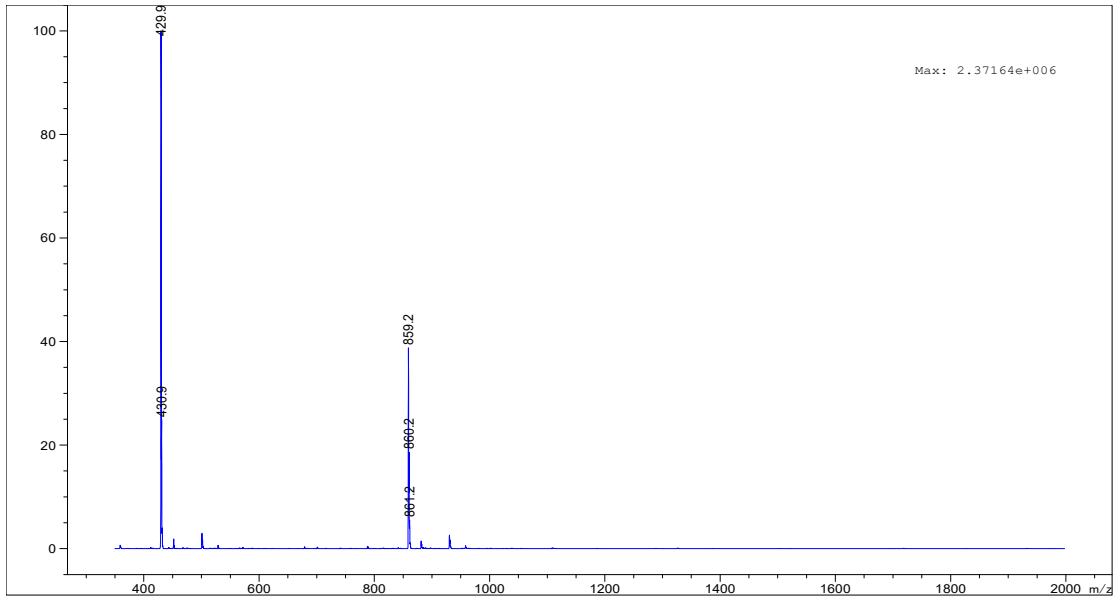

156. Compound **DALV**: obsvd.  $[M+H^+] = 416.9$

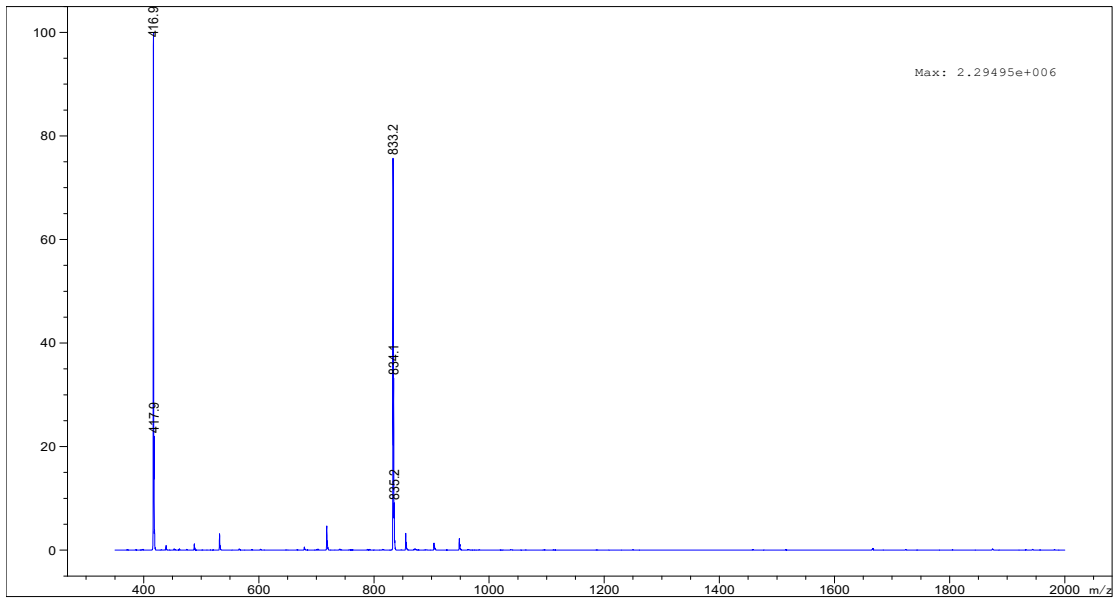

157. Compound **GVNM**: obsvd.  $[M+H^+] = 419.9$

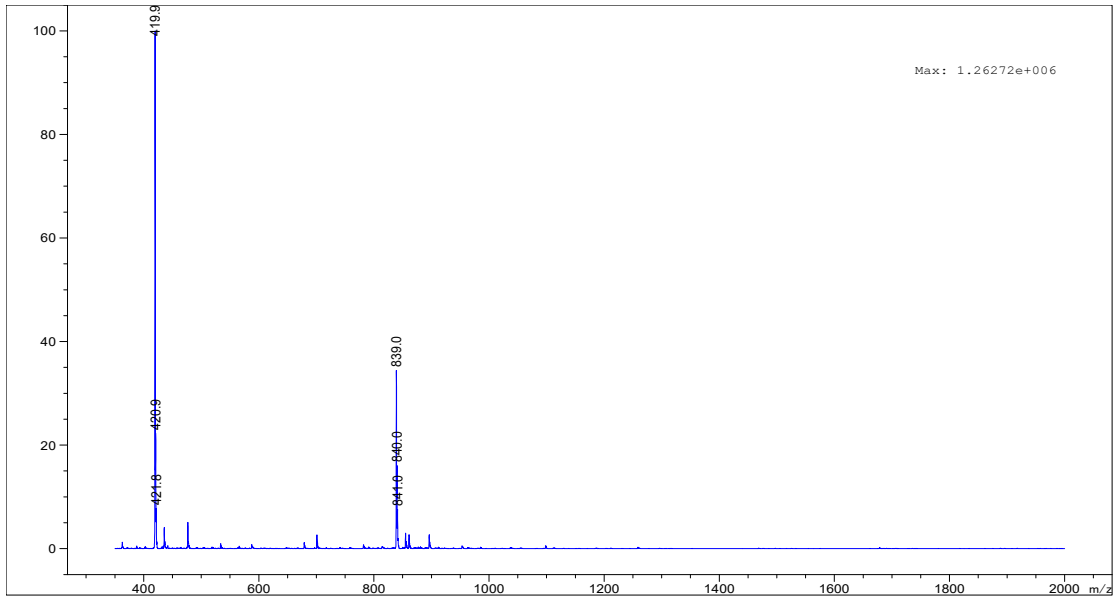

158. Compound LALR: obsvd.  $[M+H^+] = 472.0$

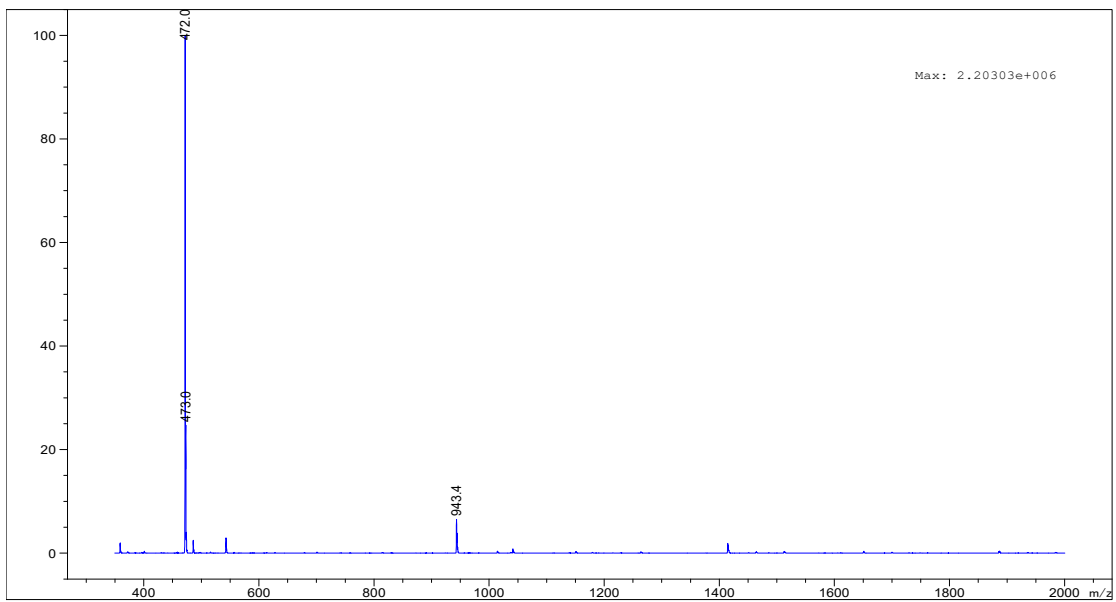

159. Compound LLRQ: obsvd.  $[M+H^+] = 528.9$

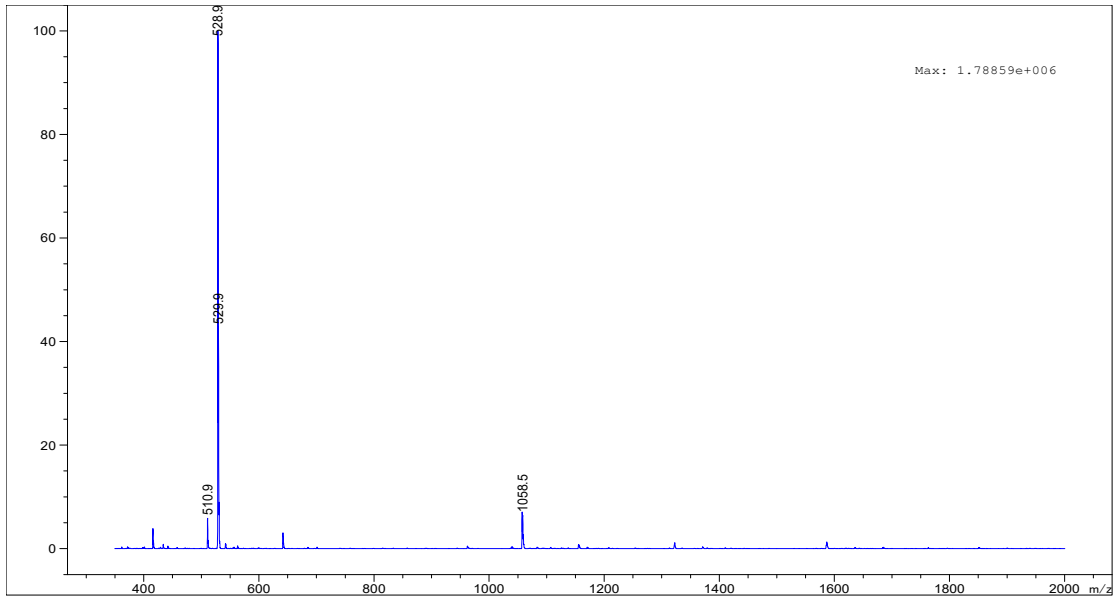

160. Compound **MVQG**: obsvd.  $[M+H]^+ = 433.9$

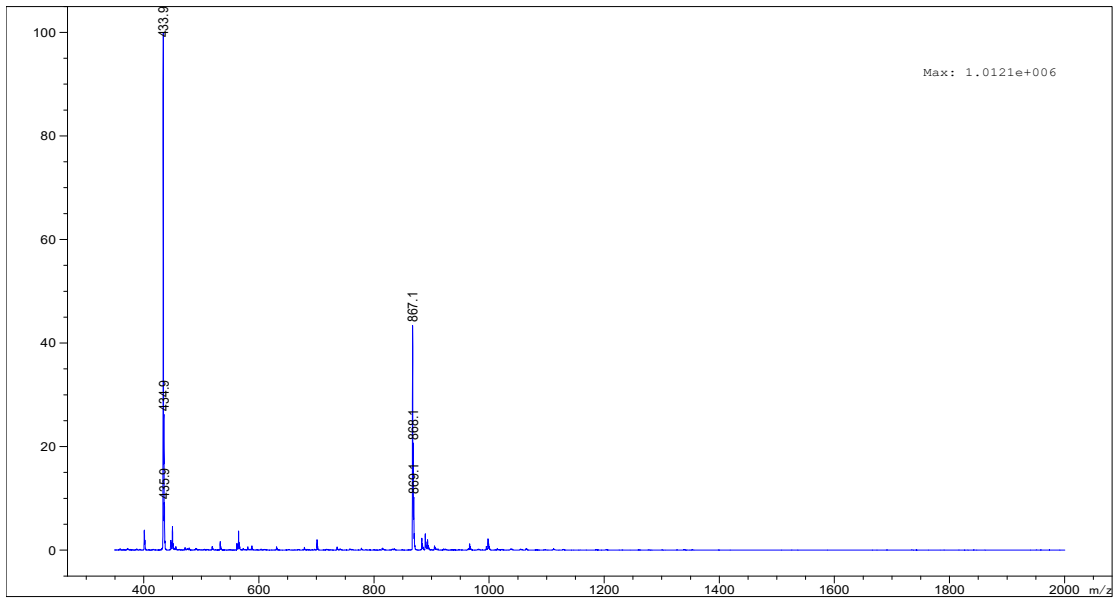

161. Compound **VALE**: obsvd.  $[M+H]^+ = 430.9$



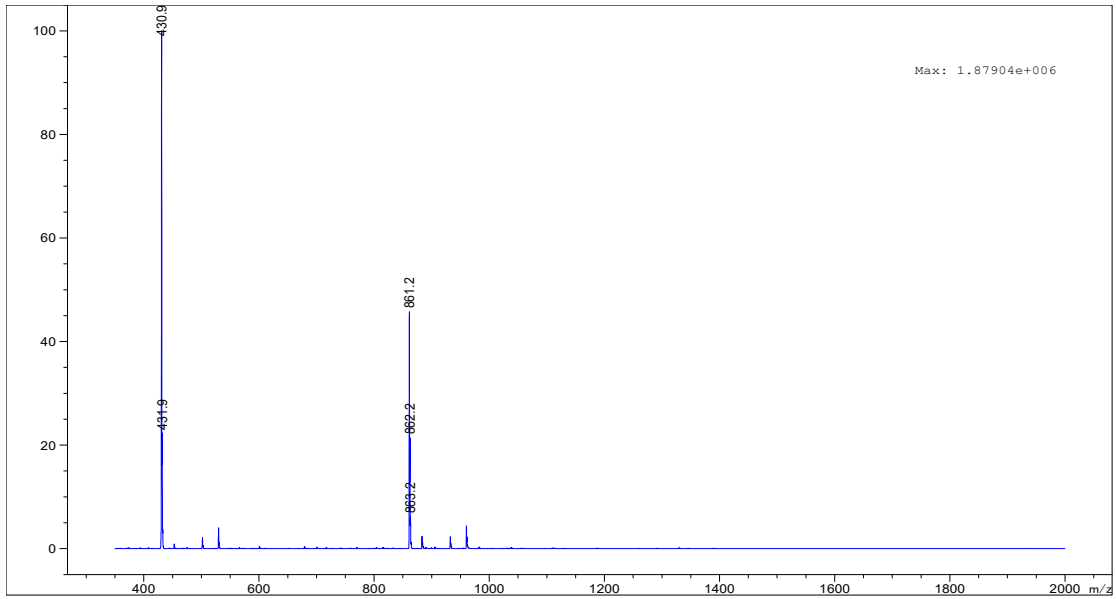

162. Compound **FAFP**: obsvd.  $[M+H]^+ = 481.0$

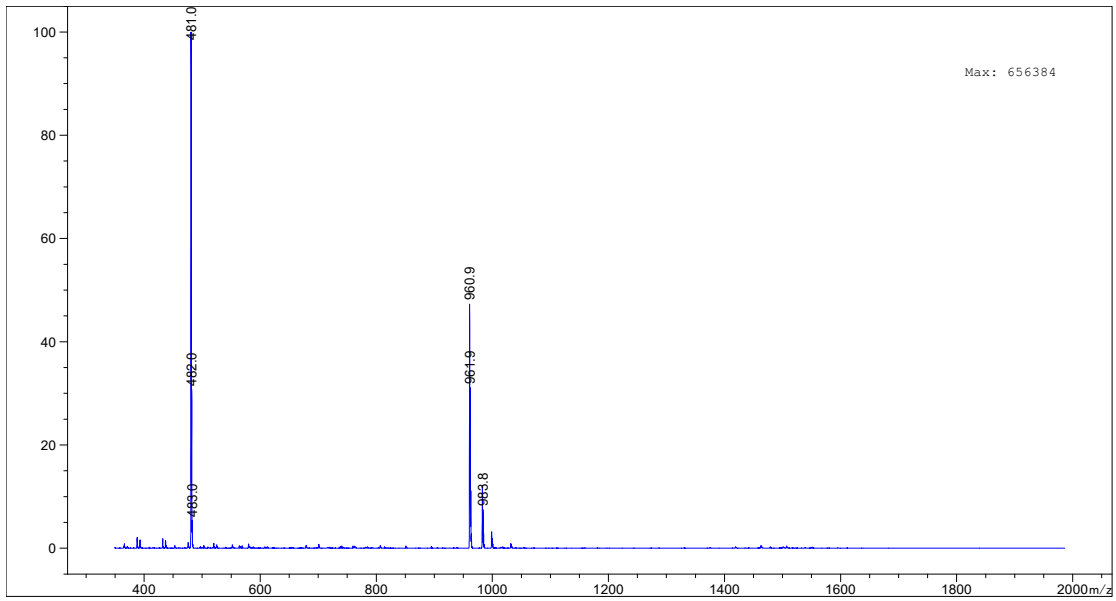

163. Compound **PWWC**: obsvd.  $[M+H]^+ = 590.8$

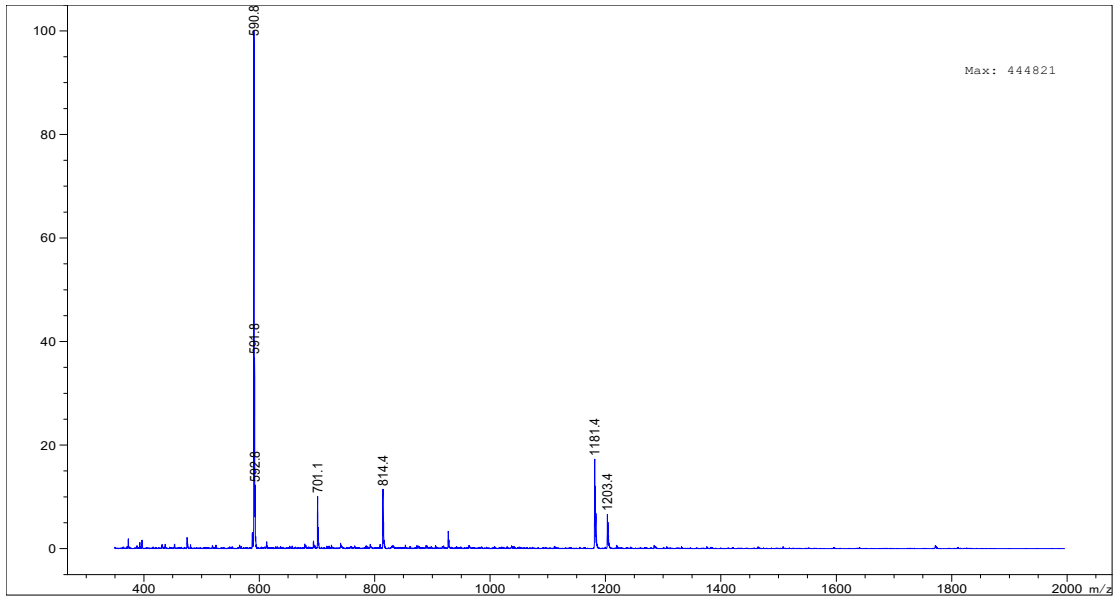

164. Compound TRFS: obsvd.  $[M+H^+] = 509.9$

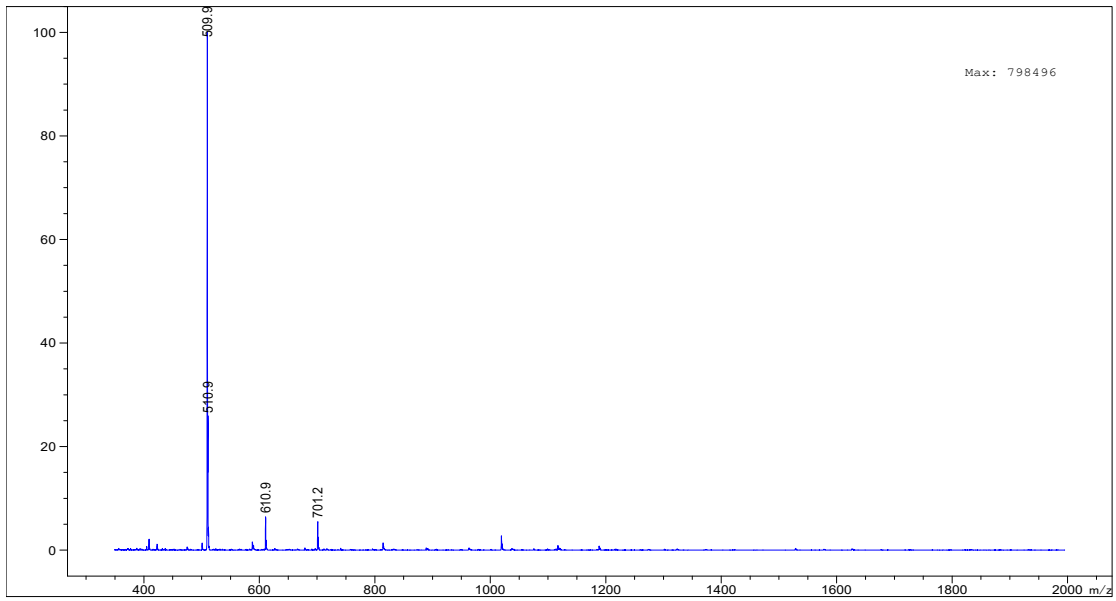

165. Compound NNNN: obsvd.  $[M+H^+] = 475.3$

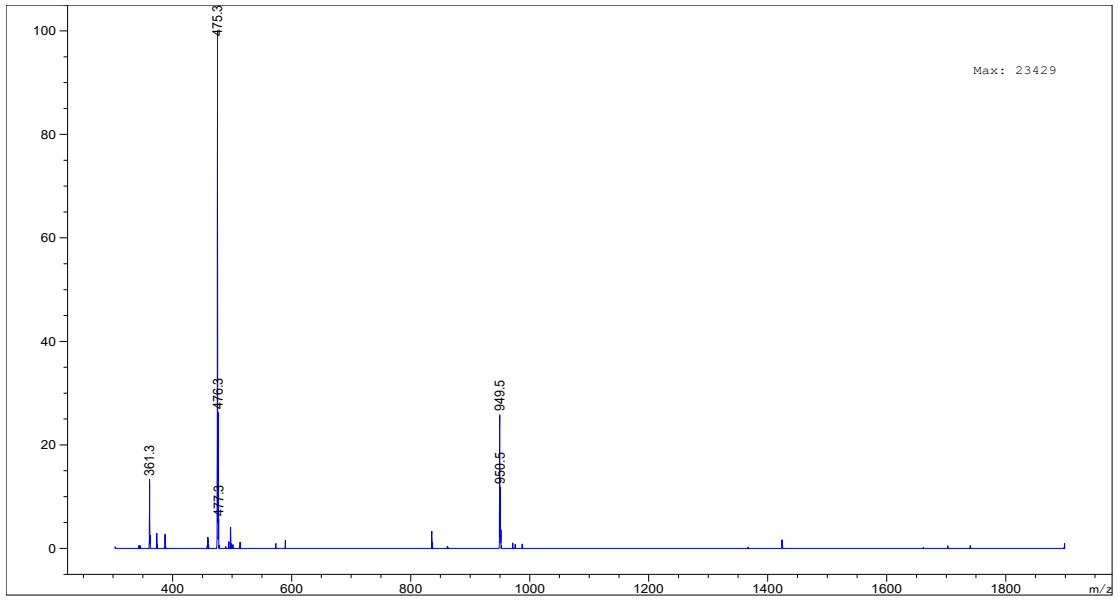

Supplement: 41467_2023_39648_MOESM7_ESM.pdf [file 41467_2023_39648_MOESM7_ESM.pdf]
