# Supplementary material for: Accelerating the prediction and discovery of peptide hydrogels with human-in-the-loop
Source: PubMed Central journal article supplement (PMC10313671; doi:10.1038/s41467-023-39648-2), 2023-06-30
Supplement: 41467_2023_39648_MOESM9_ESM.pdf [file 41467_2023_39648_MOESM9_ESM.pdf]

# Hydrogels:

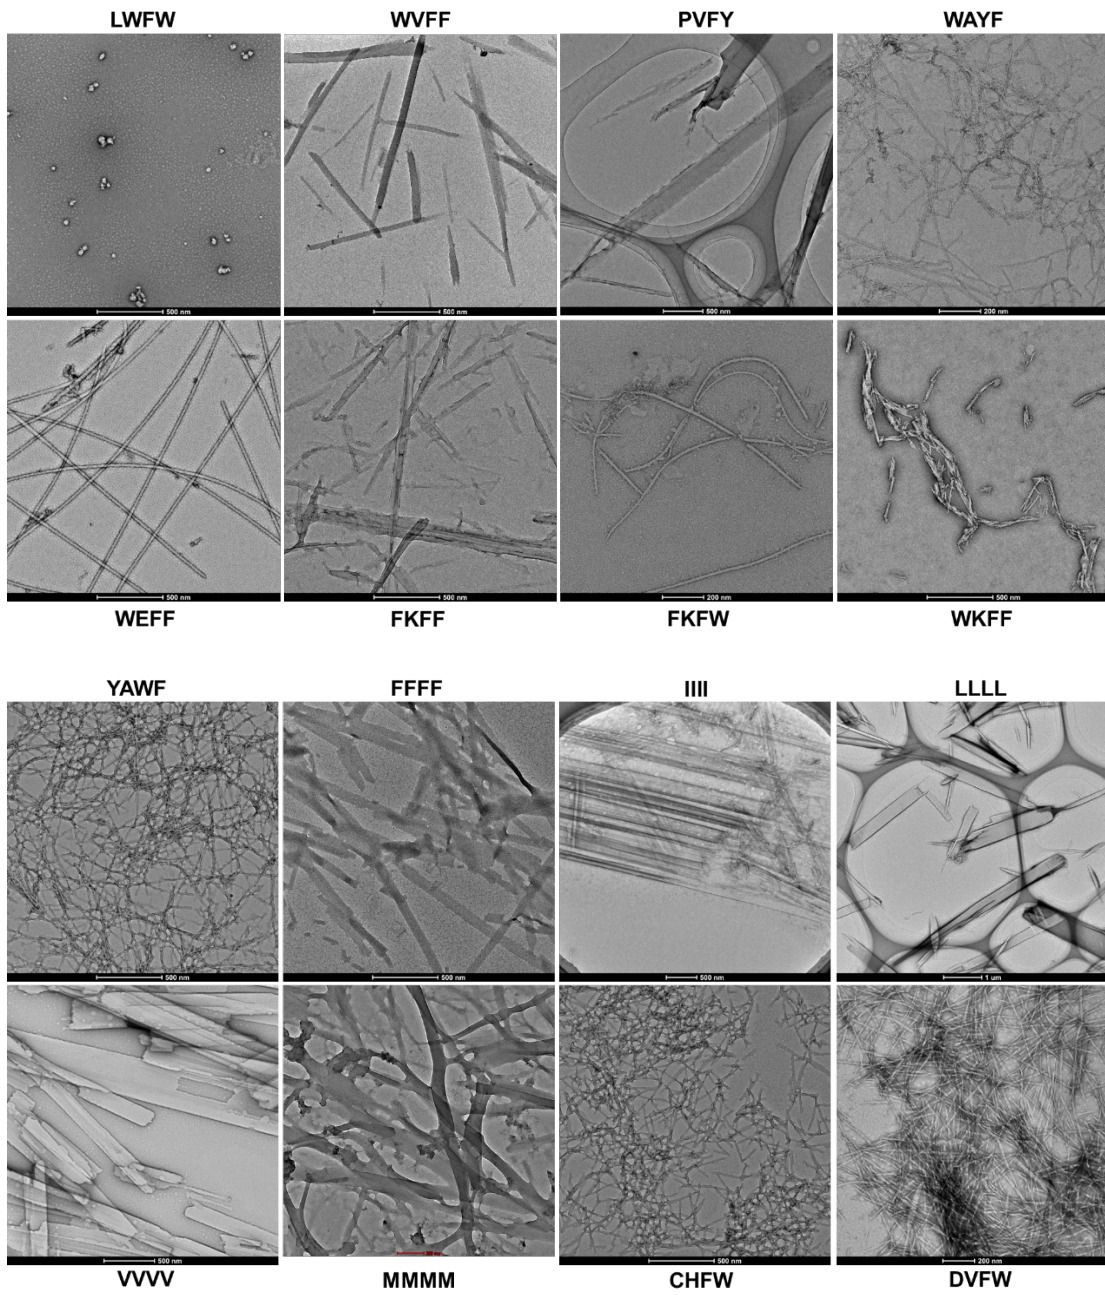

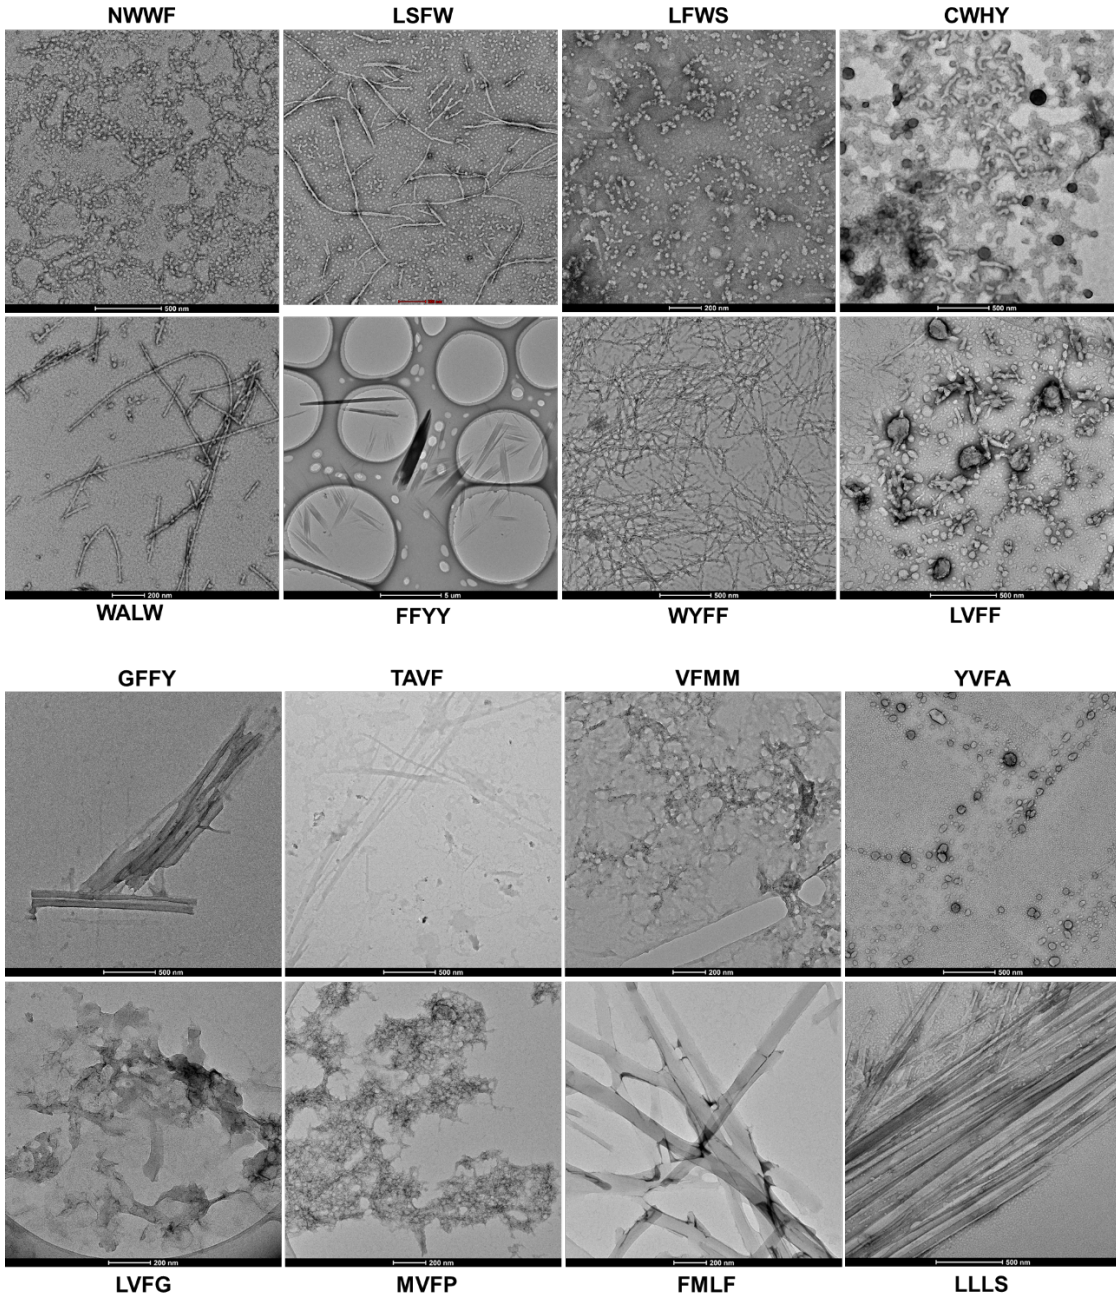

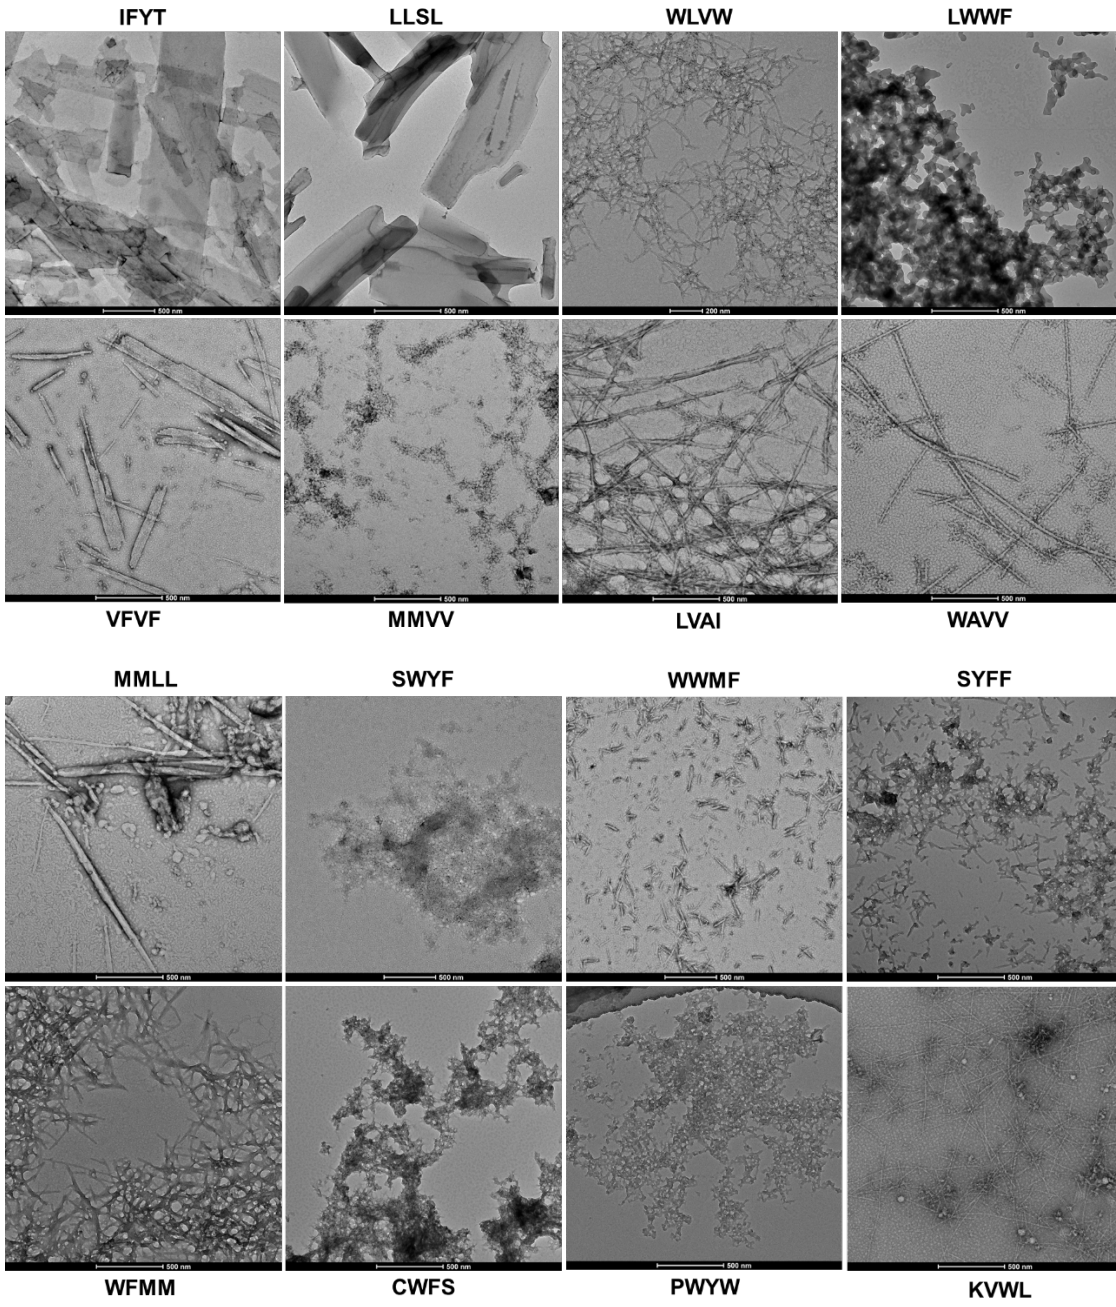

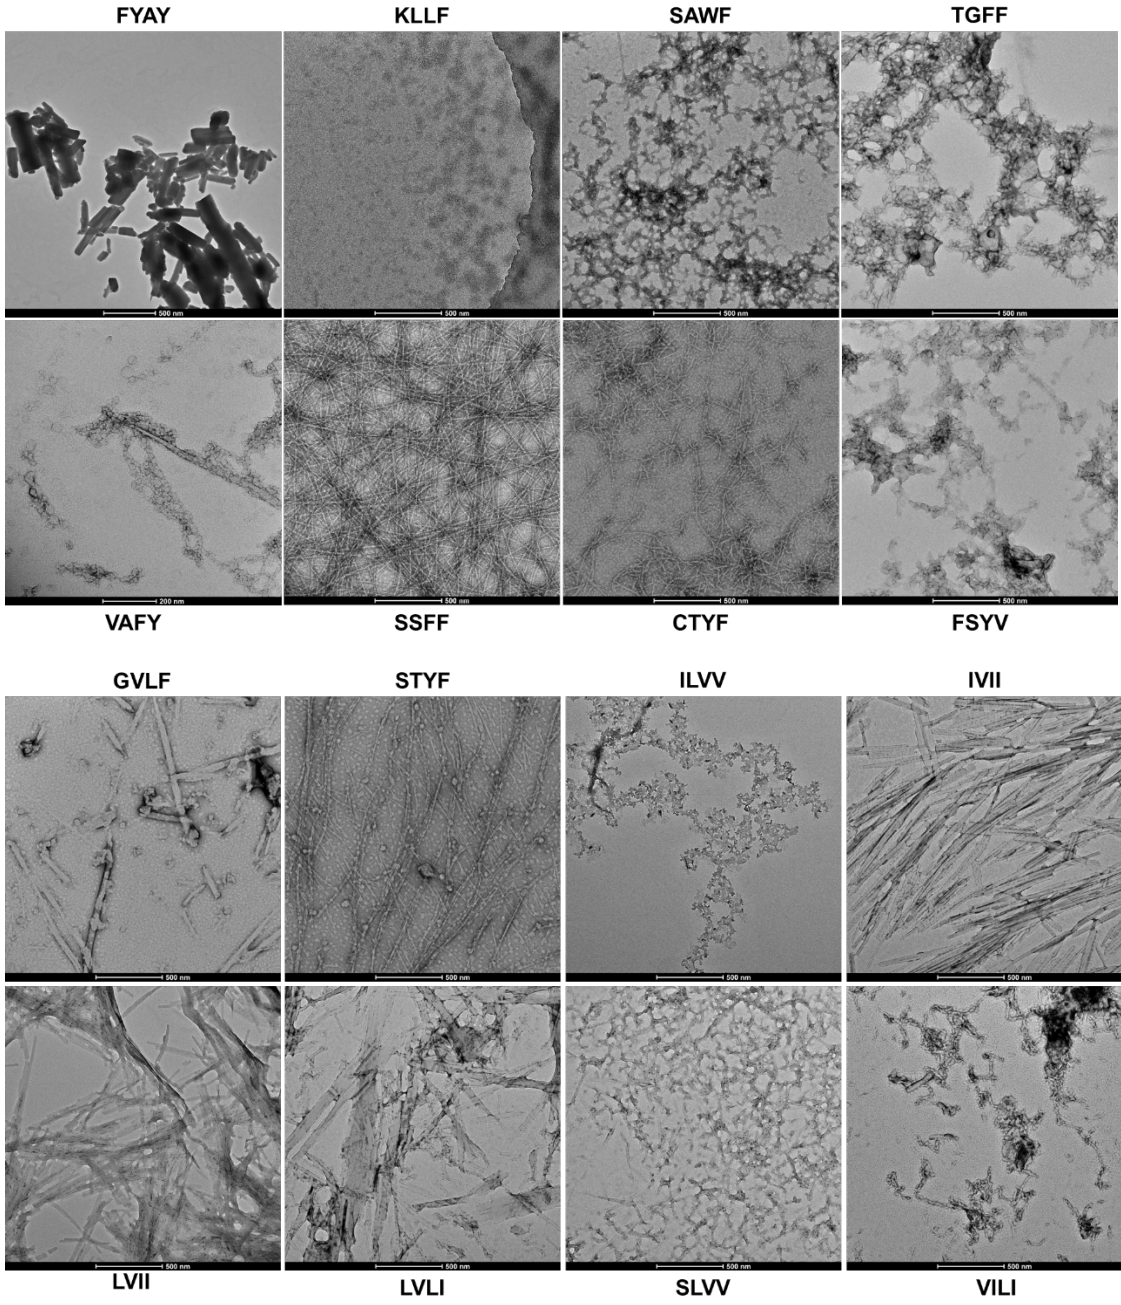

**VLVL**

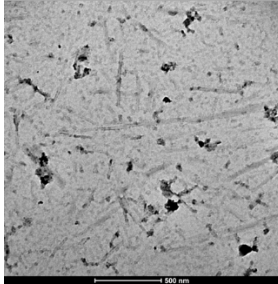

**GVFY**

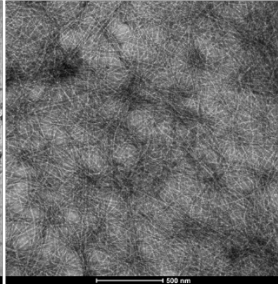

**IMVV**

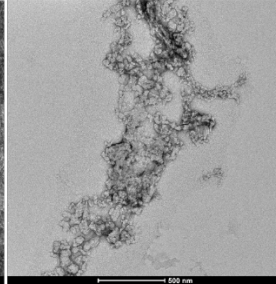

**LTLF**

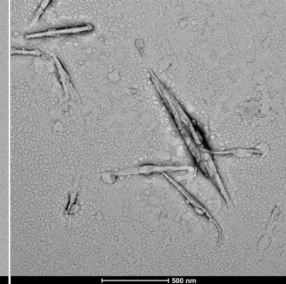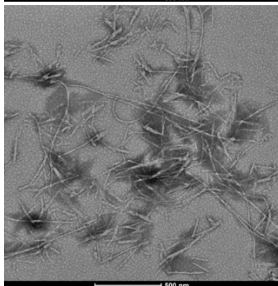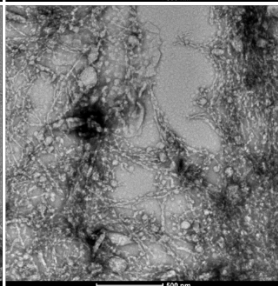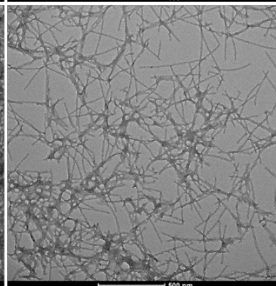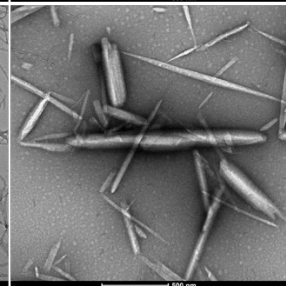

**LWFF**

**IQII**

**LVIF**

**LVWF**

**WWII**

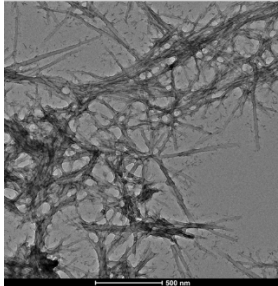

**LVII**

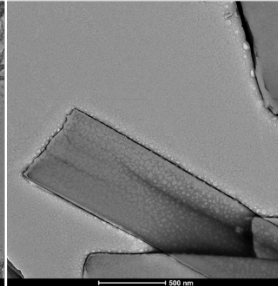

**QMVV**

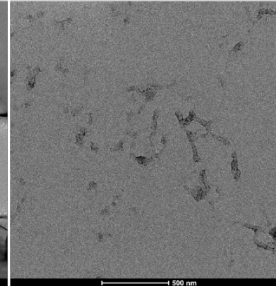

**WTIF**

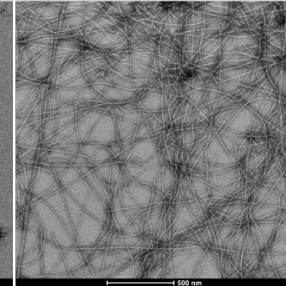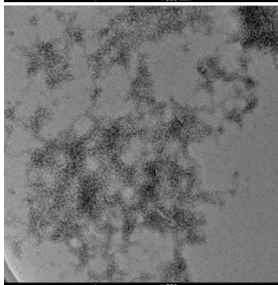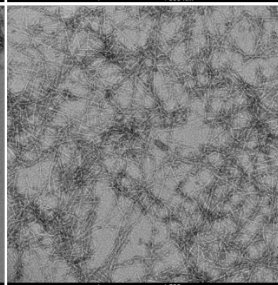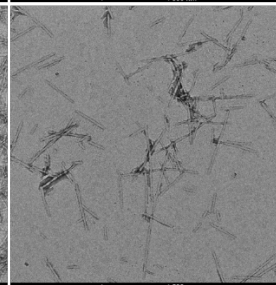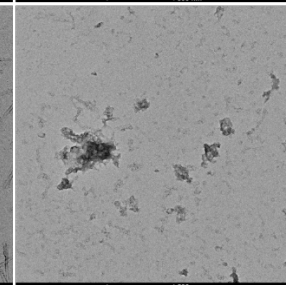

**IVIY**

**NTIF**

**FVIY**

**LLLF**

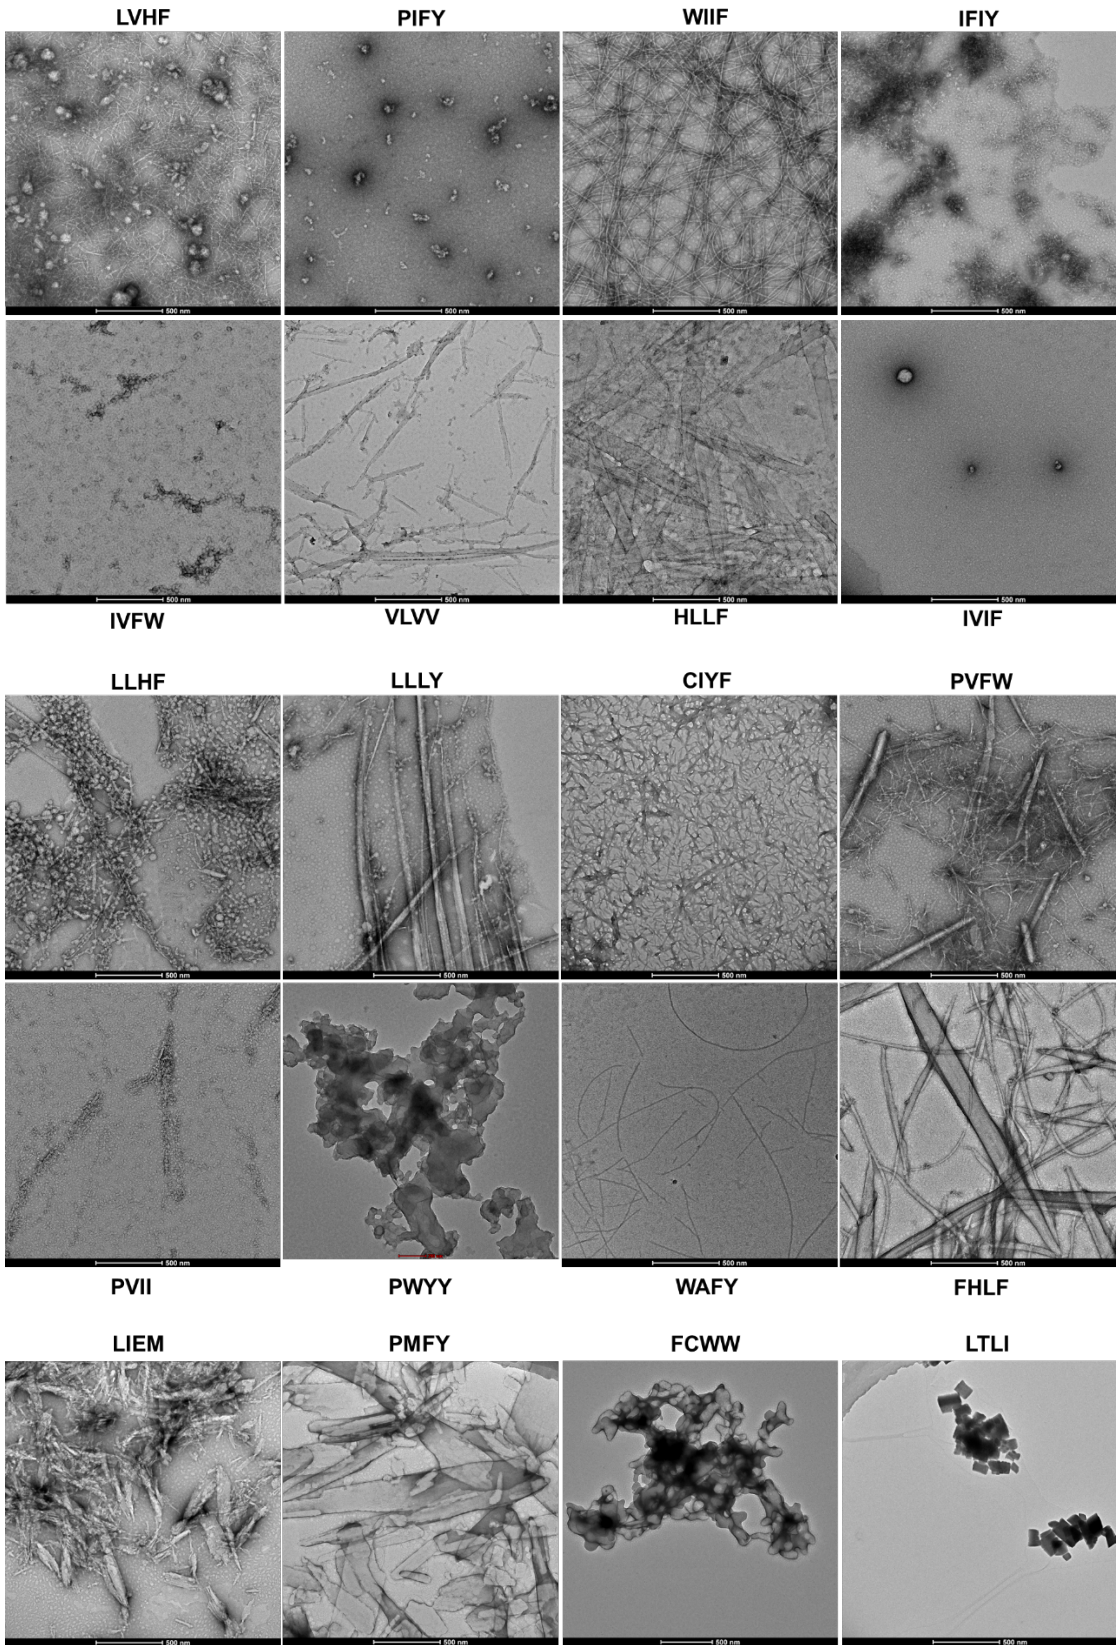

## Non-Hydrogels:

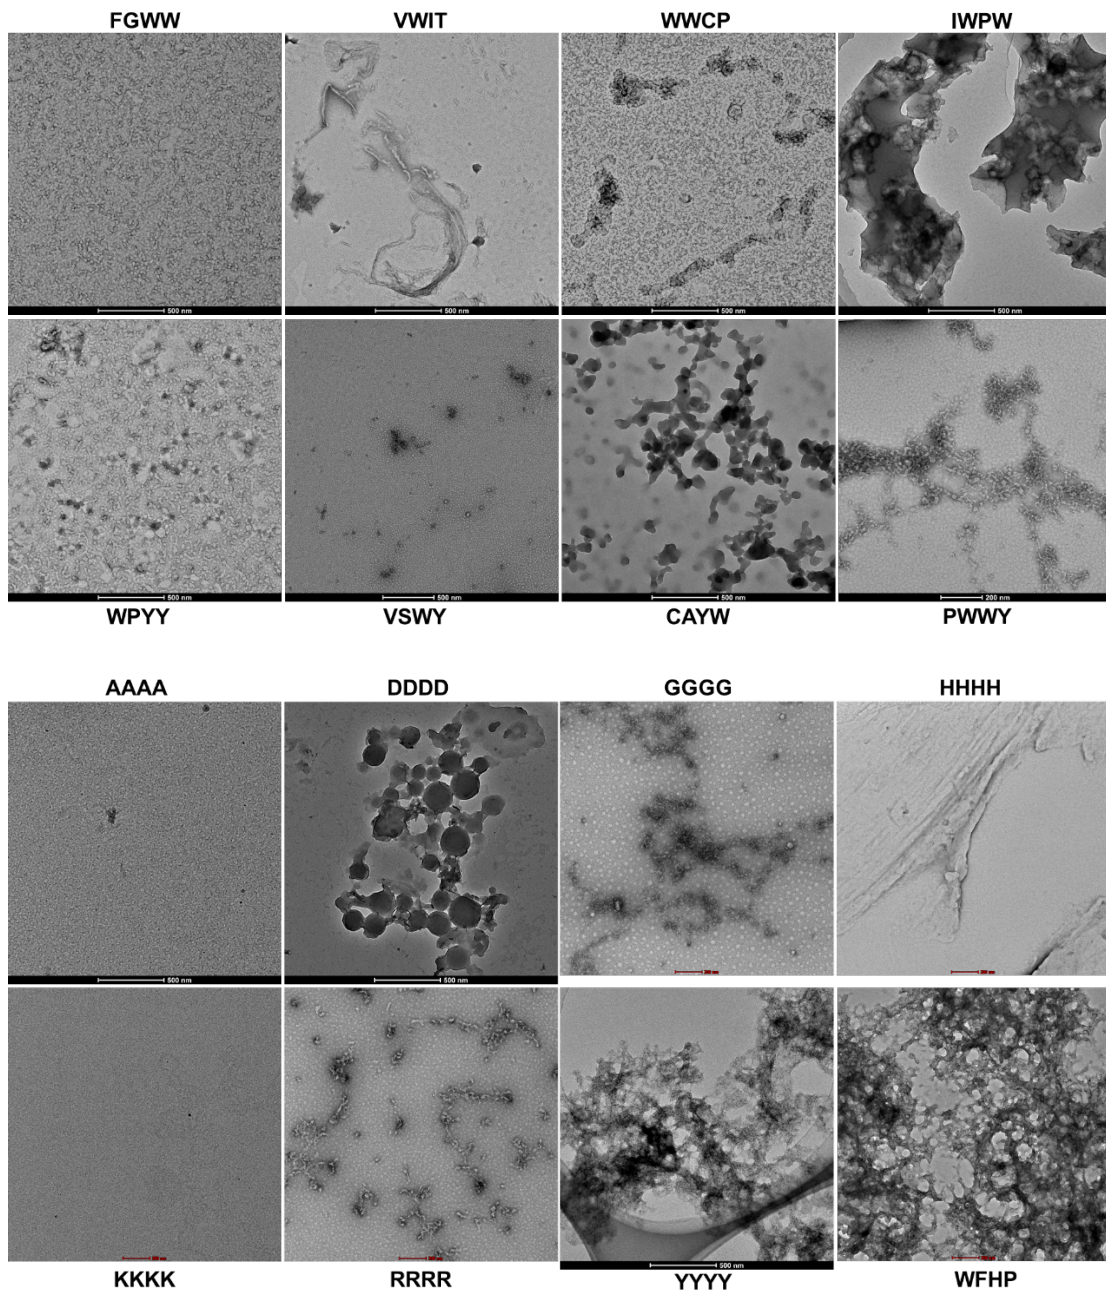

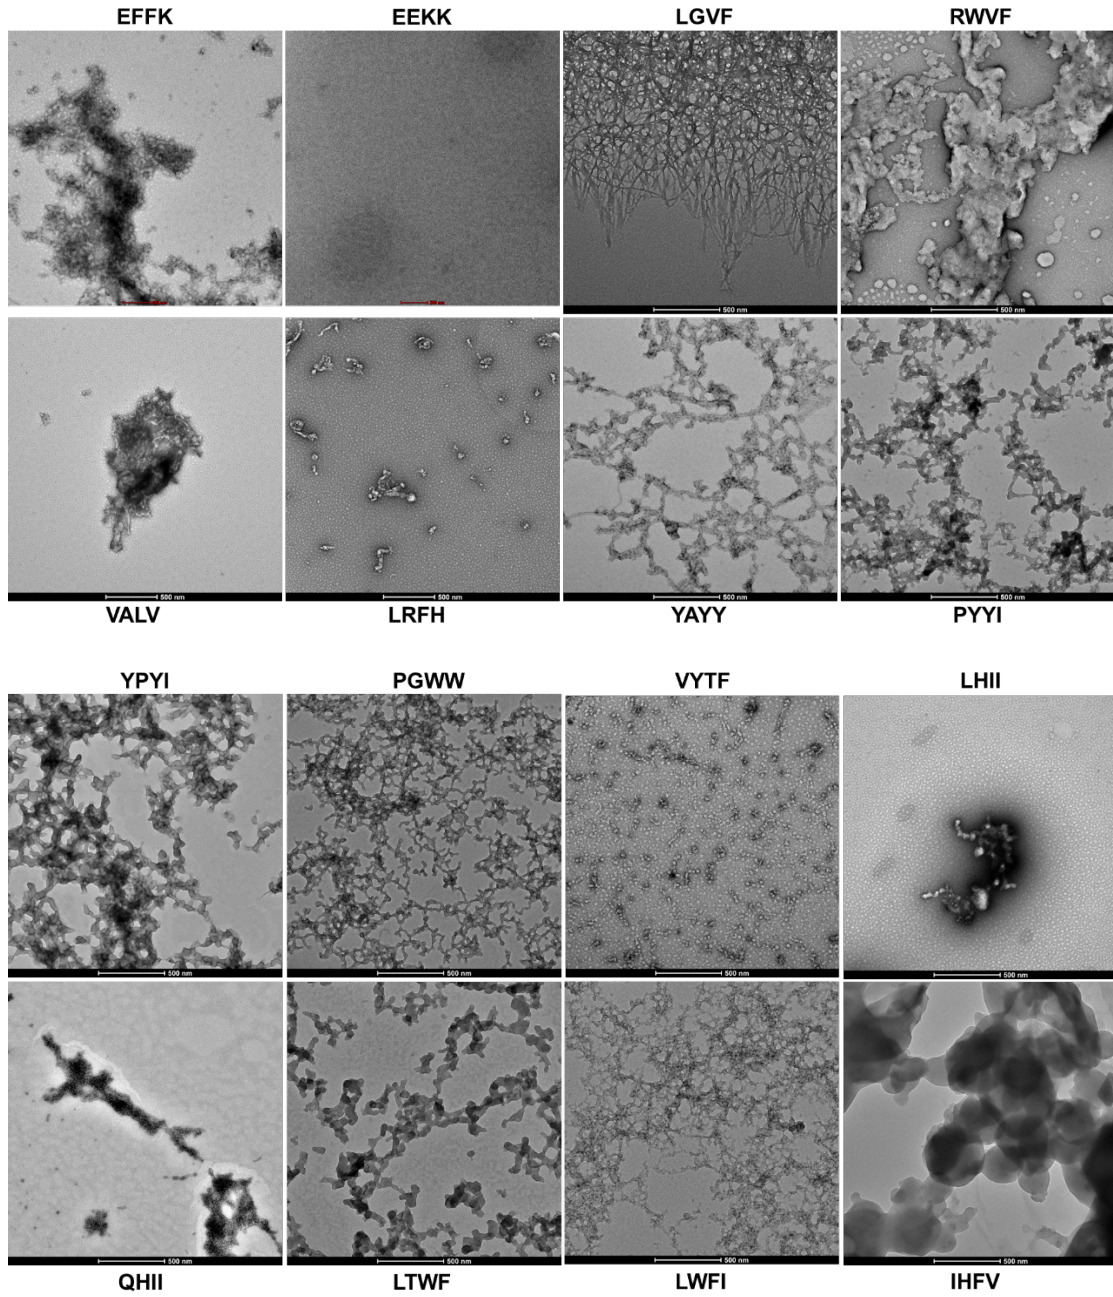



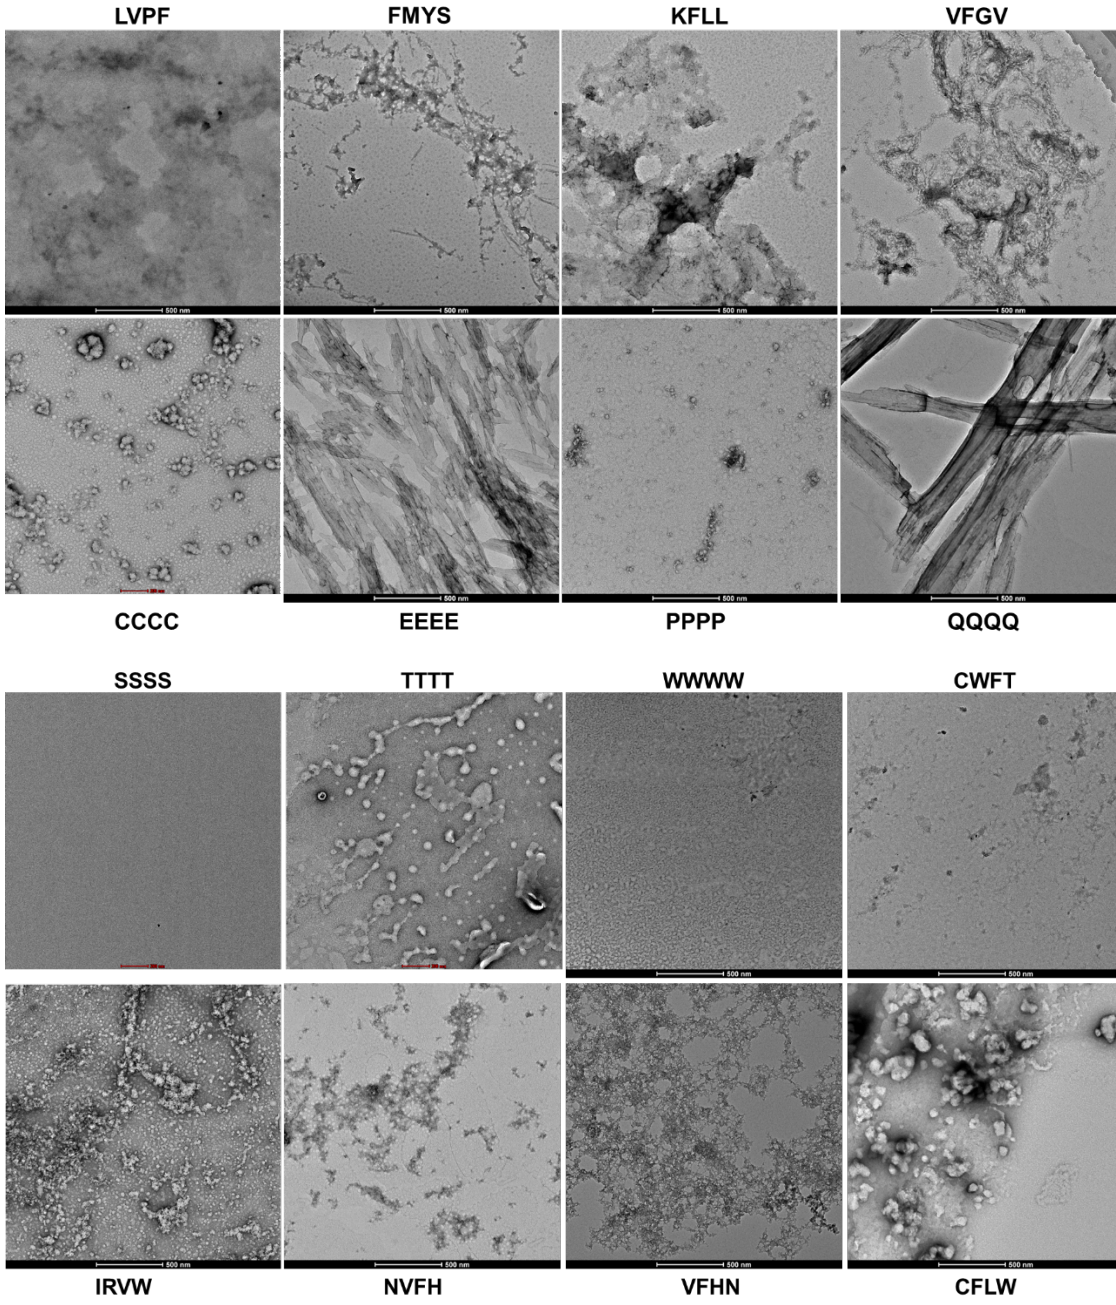

**MMYY**

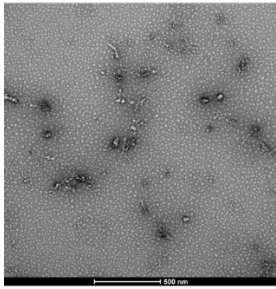

**GLLY**

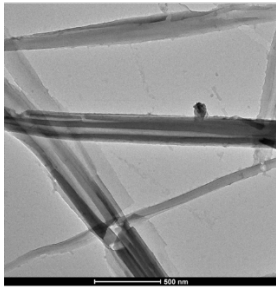

**KMLF**

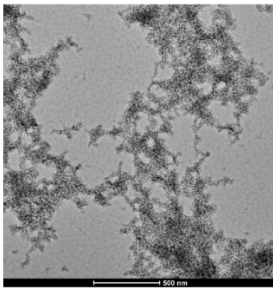

**IWII**

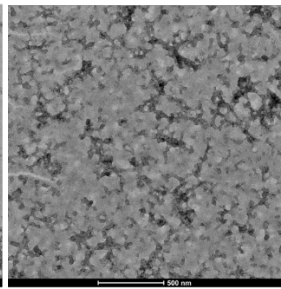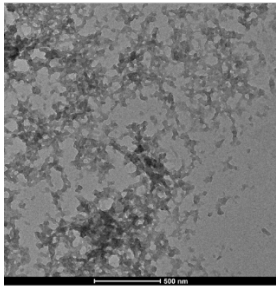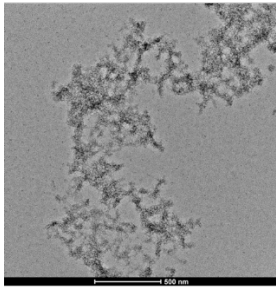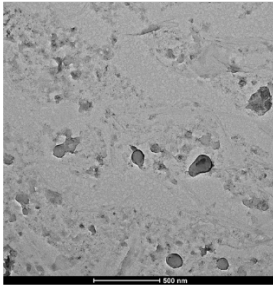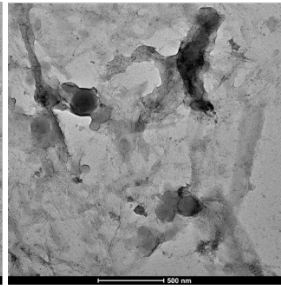

**WVFI**

**IIIR**

**AVIQ**

**DALV**

**GVNM**

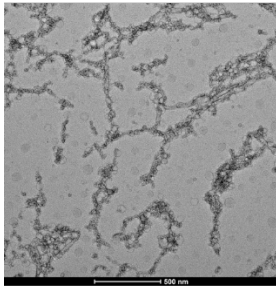

**LALR**

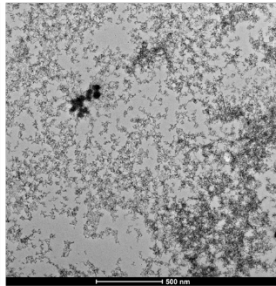

**LLRQ**

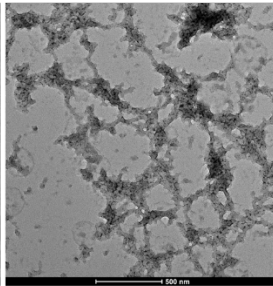

**MVQG**

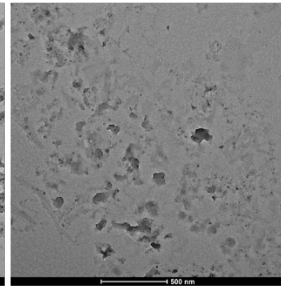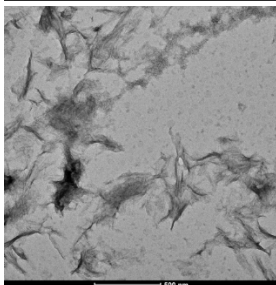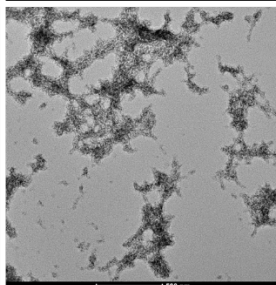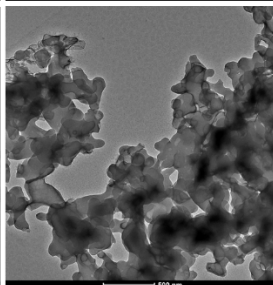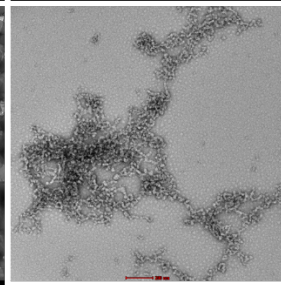

**VALE**

**FAFP**

**PWWC**

**TRFS**

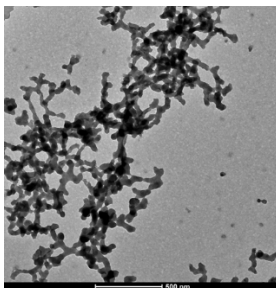

**NNNN**
